# Supplementary material
Source: publisher figshare collection journal article supplement (https://diabetesjournals.figshare.com/articles/dataset/_/23552883)
Supplement: Supplementary file 1 [file 1]

**Supplementary Table S4 Differentially expressed lncRNAs in the exosomal sequencing of the blood from PDR patients and MH patients**

| ncRNA             | control_serum | PDR_serum   | log2(Fold_change) | p-value     |
|-------------------|---------------|-------------|-------------------|-------------|
| NR_028337.1       | 304.0681576   | 3.328201177 | -6.513508291      | 5.90E-07    |
| NR_033840.1       | 296.857055    | 3.328201177 | -6.478881948      | 7.88E-07    |
| NR_028090.1       | 198.3053202   | 0           | #NAME?            | 1.70E-06    |
| NR_047549.1       | 161.047957    | 0.832050294 | -7.596603907      | 6.93E-05    |
| ENST00000565044.1 | 155.0387048   | 0.832050294 | -7.541741972      | 0.000101057 |
| ENST00000533437.1 | 134.6072476   | 0           | #NAME?            | 0.000115751 |
| ENST00000559756.1 | 152.635004    | 0.832050294 | -7.519199403      | 0.00011769  |
| NR_132647.1       | 150.2313031   | 0.832050294 | -7.496299001      | 0.000137186 |
| ENST00000591761.1 | 132.2035468   | 0           | #NAME?            | 0.000137663 |
| NR_037858.1       | 132.2035468   | 0           | #NAME?            | 0.000137663 |
| ENST00000585366.1 | 131.0016963   | 0           | #NAME?            | 0.000150181 |
| NR_036262.1       | 0             | 143.9447009 | Inf               | 0.000150385 |
| NR_027004.1       | 147.8276023   | 0.832050294 | -7.473029222      | 0.000160054 |
| ENST00000441208.1 | 129.7998459   | 0           | #NAME?            | 0.000163872 |
| NR_024505.1       | 146.6257519   | 0.832050294 | -7.461252054      | 0.000172939 |
| ENST00000556713.1 | 124.9924442   | 0           | #NAME?            | 0.000232781 |
| NR_040109.2       | 123.7905938   | 0           | #NAME?            | 0.000254247 |
| NR_135317.1       | 10.81665383   | 247.1189374 | 4.513879403       | 0.000257825 |
| NR_049725.1       | 121.3868929   | 0           | #NAME?            | 0.000303444 |
| NR_133569.1       | 121.3868929   | 0           | #NAME?            | 0.000303444 |
| ENST00000602396.1 | 120.1850425   | 0           | #NAME?            | 0.000331576 |
| NR_120632.1       | 120.1850425   | 0           | #NAME?            | 0.000331576 |
| ENST00000580897.1 | 118.9831921   | 0           | #NAME?            | 0.000362362 |
| NR_033267.1       | 117.7813417   | 0           | #NAME?            | 0.000396052 |
| NR_135610.1       | 133.4053972   | 0.832050294 | -7.324930583      | 0.000411256 |
| NR_110070.1       | 115.3776408   | 0           | #NAME?            | 0.000473259 |
| NR_109816.1       | 143.0202006   | 1.664100589 | -6.42533248       | 0.000480624 |
| NR_144760.1       | 162.2498074   | 3.328201177 | -5.607330314      | 0.000482785 |
| NR_026656.1       | 114.1757904   | 0           | #NAME?            | 0.000517399 |
| NR_110025.1       | 114.1757904   | 0           | #NAME?            | 0.000517399 |
| NR_026792.1       | 112.97394     | 0           | #NAME?            | 0.000565691 |
| ENST00000444348.1 | 128.5979955   | 0.832050294 | -7.271981703      | 0.00056691  |
| ENST00000588341.1 | 111.7720895   | 0           | #NAME?            | 0.00061852  |
| NR_144756.1       | 157.4424057   | 3.328201177 | -5.563937718      | 0.000623971 |
| NR_144758.1       | 157.4424057   | 3.328201177 | -5.563937718      | 0.000623971 |
| NR_144759.1       | 157.4424057   | 3.328201177 | -5.563937718      | 0.000623971 |

|                   |             |             |              |             |
|-------------------|-------------|-------------|--------------|-------------|
| NR_040052.1       | 204.3145723 | 9.152553238 | -4.480474034 | 0.000662677 |
| ENST00000582325.1 | 27.64255978 | 321.1714136 | 3.538380365  | 0.000709858 |
| NR_104583.1       | 235.5626833 | 14.144855   | -4.05776172  | 0.000712713 |
| NR_034133.1       | 124.9924442 | 0.832050294 | -7.230954435 | 0.000722292 |
| NR_135092.1       | 278.8292986 | 21.63330765 | -3.688055994 | 0.000754935 |
| ENST00000502188.1 | 108.1665383 | 0           | #NAME?       | 0.000808608 |
| ENST00000565046.1 | 108.1665383 | 0           | #NAME?       | 0.000808608 |
| NR_047683.1       | 122.5887434 | 0.832050294 | -7.202940059 | 0.000849358 |
| ENST00000560197.1 | 106.9646878 | 0           | #NAME?       | 0.000884159 |
| NR_126499.1       | 106.9646878 | 0           | #NAME?       | 0.000884159 |
| NR_026876.1       | 121.3868929 | 0.832050294 | -7.188726199 | 0.00092117  |
| NR_047588.1       | 132.2035468 | 1.664100589 | -6.31187443  | 0.000936511 |
| NR_047590.1       | 132.2035468 | 1.664100589 | -6.31187443  | 0.000936511 |
| NR_003000.1       | 2.40370085  | 146.4408518 | 5.928916902  | 0.000965209 |
| ENST00000517408.1 | 105.7628374 | 0           | #NAME?       | 0.000966741 |
| NR_073036.1       | 105.7628374 | 0           | #NAME?       | 0.000966741 |
| NR_103446.1       | 105.7628374 | 0           | #NAME?       | 0.000966741 |
| ENST00000591558.1 | 7.211102551 | 186.3792659 | 4.691877705  | 0.000976974 |
| NR_134851.1       | 120.1850425 | 0.832050294 | -7.174370906 | 0.000999131 |
| NR_073034.1       | 104.560987  | 0           | #NAME?       | 0.001056986 |
| NR_134849.1       | 118.9831921 | 0.832050294 | -7.159871337 | 0.001083761 |
| NR_134850.1       | 118.9831921 | 0.832050294 | -7.159871337 | 0.001083761 |
| NR_040051.1       | 191.0942176 | 9.152553238 | -4.383966053 | 0.001141871 |
| NR_073154.1       | 191.0942176 | 9.152553238 | -4.383966053 | 0.001141871 |
| ENST00000526646.1 | 102.1572861 | 0           | #NAME?       | 0.001263268 |
| NR_104199.1       | 102.1572861 | 0           | #NAME?       | 0.001263268 |
| ENST00000425109.2 | 127.3961451 | 1.664100589 | -6.258435171 | 0.001264546 |
| NR_024261.2       | 164.6535082 | 5.82435206  | -4.821191878 | 0.001299309 |
| NR_104579.1       | 20.43145723 | 257.103541  | 3.65348547   | 0.001314363 |
| NR_073403.1       | 58.89067083 | 464.2840642 | 2.978896751  | 0.001376368 |
| NR_024087.1       | 100.9554357 | 0           | #NAME?       | 0.001380849 |
| NR_024088.1       | 100.9554357 | 0           | #NAME?       | 0.001380849 |
| NR_036595.1       | 100.9554357 | 0           | #NAME?       | 0.001380849 |
| ENST00000563495.1 | 243.9756363 | 19.13715677 | -3.672288678 | 0.001395156 |
| NR_144755.1       | 141.8183502 | 3.328201177 | -5.413157766 | 0.00145804  |
| ENST00000429588.1 | 99.75358529 | 0           | #NAME?       | 0.001509192 |
| ENST00000560128.1 | 99.75358529 | 0           | #NAME?       | 0.001509192 |
| NR_026860.1       | 99.75358529 | 0           | #NAME?       | 0.001509192 |
| NR_038326.1       | 99.75358529 | 0           | #NAME?       | 0.001509192 |
| NR_136334.1       | 99.75358529 | 0           | #NAME?       | 0.001509192 |
| NR_027302.1       | 43.26661531 | 367.7662301 | 3.087462841  | 0.001588533 |

|                   |             |             |              |             |
|-------------------|-------------|-------------|--------------|-------------|
| ENST00000569962.1 | 98.55173486 | 0           | #NAME?       | 0.00164905  |
| NR_015434.1       | 98.55173486 | 0           | #NAME?       | 0.00164905  |
| NR_135766.1       | 0           | 107.334488  | Inf          | 0.001693948 |
| ENST00000560903.1 | 24.0370085  | 264.5919936 | 3.460440144  | 0.001796567 |
| ENST00000435578.1 | 15.62405553 | 221.3253783 | 3.824328001  | 0.001797863 |
| ENST00000452909.1 | 97.34988444 | 0           | #NAME?       | 0.001800613 |
| ENST00000503113.1 | 97.34988444 | 0           | #NAME?       | 0.001800613 |
| ENST00000431385.1 | 9.614803401 | 186.3792659 | 4.276840205  | 0.001868785 |
| NR_144468.1       | 96.14803401 | 0           | #NAME?       | 0.001965061 |
| NR_004387.1       | 34.85366233 | 313.682961  | 3.169925001  | 0.001984363 |
| ENST00000533859.1 | 210.3238244 | 14.9769053  | -3.811800827 | 0.002031949 |
| ENST00000422117.1 | 109.3683887 | 0.832050294 | -7.038309357 | 0.002078831 |
| ENST00000608373.1 | 94.94618359 | 0           | #NAME?       | 0.002143926 |
| NR_125845.1       | 94.94618359 | 0           | #NAME?       | 0.002143926 |
| NR_027622.1       | 175.4701621 | 9.152553238 | -4.260907657 | 0.002188459 |
| NR_037870.1       | 117.7813417 | 1.664100589 | -6.145224561 | 0.002314243 |
| NR_126005.1       | 201.9108714 | 14.144855   | -3.835369298 | 0.002341361 |
| ENST00000607857.1 | 0           | 102.3421862 | Inf          | 0.002370542 |
| NR_104314.1       | 106.9646878 | 0.832050294 | -7.006248148 | 0.002445889 |
| ENST00000608818.1 | 0           | 101.5101359 | Inf          | 0.002506811 |
| NR_111984.1       | 167.0572091 | 8.320502943 | -4.327527695 | 0.002519376 |
| ENST00000529518.1 | 92.54248274 | 0           | #NAME?       | 0.002552507 |
| ENST00000561834.1 | 92.54248274 | 0           | #NAME?       | 0.002552507 |
| ENST00000567021.1 | 92.54248274 | 0           | #NAME?       | 0.002552507 |
| NR_134874.1       | 92.54248274 | 0           | #NAME?       | 0.002552507 |
| NR_027374.1       | 105.7628374 | 0.832050294 | -6.989946335 | 0.002652743 |
| NR_047592.1       | 115.3776408 | 1.664100589 | -6.115477217 | 0.00269253  |
| ENST00000508985.1 | 91.34063231 | 0           | #NAME?       | 0.002786942 |
| ENST00000566529.1 | 91.34063231 | 0           | #NAME?       | 0.002786942 |
| ENST00000608016.1 | 91.34063231 | 0           | #NAME?       | 0.002786942 |
| ENST00000610043.1 | 91.34063231 | 0           | #NAME?       | 0.002786942 |
| NR_044993.1       | 91.34063231 | 0           | #NAME?       | 0.002786942 |
| NR_103447.1       | 91.34063231 | 0           | #NAME?       | 0.002786942 |
| NR_110741.1       | 91.34063231 | 0           | #NAME?       | 0.002786942 |
| ENST00000442841.1 | 0           | 99.84603532 | Inf          | 0.002802883 |
| NR_004862.1       | 114.1757904 | 1.664100589 | -6.100370325 | 0.00290422  |
| NR_109907.1       | 114.1757904 | 1.664100589 | -6.100370325 | 0.00290422  |
| NR_144757.1       | 128.5979955 | 3.328201177 | -5.271981703 | 0.003038078 |
| ENST00000538641.1 | 90.13878189 | 0           | #NAME?       | 0.003045385 |
| ENST00000560238.1 | 90.13878189 | 0           | #NAME?       | 0.003045385 |
| NR_030774.1       | 90.13878189 | 0           | #NAME?       | 0.003045385 |

|                   |             |             |              |             |
|-------------------|-------------|-------------|--------------|-------------|
| NR_125362.1       | 157.4424057 | 7.488452649 | -4.394012717 | 0.003063811 |
| ENST00000591772.1 | 103.3591366 | 0.832050294 | -6.956779471 | 0.003119442 |
| NR_109906.1       | 112.97394   | 1.664100589 | -6.085103568 | 0.003132467 |
| NR_144390.1       | 66.10177338 | 439.3225554 | 2.732519689  | 0.003141143 |
| NR_144391.1       | 66.10177338 | 438.4905051 | 2.729784721  | 0.003175084 |
| NR_027158.1       | 133.4053972 | 832.0502943 | 2.640853702  | 0.003218287 |
| NR_027165.1       | 133.4053972 | 832.0502943 | 2.640853702  | 0.003218287 |
| ENST00000421257.1 | 88.93693146 | 0           | #NAME?       | 0.003331482 |
| ENST00000445035.2 | 88.93693146 | 0           | #NAME?       | 0.003331482 |
| ENST00000567769.1 | 88.93693146 | 0           | #NAME?       | 0.003331482 |
| NR_027954.1       | 88.93693146 | 551.6493451 | 2.632896978  | 0.00337579  |
| NR_144444.1       | 16.82590595 | 208.0125736 | 3.627914646  | 0.003413142 |
| NR_104359.1       | 164.6535082 | 9.152553238 | -4.169115181 | 0.003444958 |
| ENST00000501016.2 | 137.0109485 | 842.8669482 | 2.621013728  | 0.003456674 |
| NR_001297.1       | 126.1942946 | 3.328201177 | -5.244760234 | 0.003475741 |
| ENST00000522768.1 | 87.73508104 | 0           | #NAME?       | 0.003649598 |
| ENST00000569742.1 | 87.73508104 | 0           | #NAME?       | 0.003649598 |
| ENST00000577270.1 | 87.73508104 | 0           | #NAME?       | 0.003649598 |
| NR_030727.1       | 87.73508104 | 0           | #NAME?       | 0.003649598 |
| NR_072993.1       | 87.73508104 | 0           | #NAME?       | 0.003649598 |
| ENST00000524011.1 | 37.25736318 | 296.2099048 | 2.991022404  | 0.003672838 |
| ENST00000538062.1 | 99.75358529 | 0.832050294 | -6.905554148 | 0.00397378  |
| NR_027170.1       | 176.6720125 | 1125.764048 | 2.671759062  | 0.003982215 |
| ENST00000434541.1 | 86.53323061 | 0           | #NAME?       | 0.004004216 |
| ENST00000441167.1 | 86.53323061 | 0           | #NAME?       | 0.004004216 |
| ENST00000523496.1 | 86.53323061 | 0           | #NAME?       | 0.004004216 |
| ENST00000577437.1 | 86.53323061 | 0           | #NAME?       | 0.004004216 |
| NR_038444.1       | 86.53323061 | 0           | #NAME?       | 0.004004216 |
| NR_046836.1       | 86.53323061 | 0           | #NAME?       | 0.004004216 |
| NR_104065.1       | 86.53323061 | 0           | #NAME?       | 0.004004216 |
| NR_110683.1       | 86.53323061 | 0           | #NAME?       | 0.004004216 |
| NR_027166.1       | 175.4701621 | 1104.962791 | 2.654700156  | 0.004088688 |
| ENST00000413820.1 | 159.8461065 | 9.152553238 | -4.126365534 | 0.004217001 |
| NR_138571.1       | 108.1665383 | 1.664100589 | -6.022367813 | 0.004237275 |
| NR_045022.1       | 179.0757133 | 1125.764048 | 2.652262887  | 0.004238395 |
| NR_122043.1       | 98.55173486 | 0.832050294 | -6.888066721 | 0.004306227 |
| NR_045029.1       | 177.8738629 | 1104.962791 | 2.635071349  | 0.004353696 |
| ENST00000430442.1 | 85.33138019 | 0           | #NAME?       | 0.004398037 |
| NR_002718.2       | 85.33138019 | 0           | #NAME?       | 0.004398037 |
| NR_131233.1       | 85.33138019 | 0           | #NAME?       | 0.004398037 |
| NR_046087.1       | 106.9646878 | 1.664100589 | -6.006248148 | 0.004568783 |

|                   |             |             |              |             |
|-------------------|-------------|-------------|--------------|-------------|
| ENST00000603199.1 | 0           | 92.35758267 | Inf          | 0.004598715 |
| NR_026806.1       | 88.93693146 | 519.1993837 | 2.545434137  | 0.00460993  |
| NR_036483.2       | 97.34988444 | 0.832050294 | -6.87036472  | 0.0046645   |
| NR_135190.1       | 97.34988444 | 0.832050294 | -6.87036472  | 0.0046645   |
| NR_003034.2       | 37.25736318 | 284.5612007 | 2.933141488  | 0.004734789 |
| NR_027168.2       | 173.0664612 | 1030.078264 | 2.573355881  | 0.004824633 |
| ENST00000419190.1 | 84.12952976 | 0           | #NAME?       | 0.004834245 |
| ENST00000526131.1 | 84.12952976 | 0           | #NAME?       | 0.004834245 |
| ENST00000543308.1 | 84.12952976 | 0           | #NAME?       | 0.004834245 |
| ENST00000568471.1 | 84.12952976 | 0           | #NAME?       | 0.004834245 |
| ENST00000582249.1 | 84.12952976 | 0           | #NAME?       | 0.004834245 |
| NR_036489.1       | 84.12952976 | 0           | #NAME?       | 0.004834245 |
| ENST00000566960.1 | 0           | 91.52553238 | Inf          | 0.004859566 |
| NR_075091.1       | 126.1942946 | 4.160251472 | -4.922832139 | 0.004877176 |
| NR_110065.1       | 151.4331536 | 8.320502943 | -4.185866545 | 0.004956372 |
| ENST00000380722.1 | 96.14803401 | 0.832050294 | -6.852442812 | 0.00504915  |
| NR_027256.1       | 96.14803401 | 0.832050294 | -6.852442812 | 0.00504915  |
| NR_046654.1       | 0           | 90.69348208 | Inf          | 0.005136879 |
| NR_002714.1       | 82.92767934 | 0           | #NAME?       | 0.005316053 |
| NR_026867.1       | 82.92767934 | 0           | #NAME?       | 0.005316053 |
| NR_046100.1       | 82.92767934 | 0           | #NAME?       | 0.005316053 |
| NR_134505.1       | 82.92767934 | 0           | #NAME?       | 0.005316053 |
| NR_027167.1       | 149.0294527 | 833.7143949 | 2.483955766  | 0.005344854 |
| NR_033966.1       | 94.94618359 | 0.832050294 | -6.834295465 | 0.005462947 |
| NR_125371.1       | 189.8923672 | 16.64100589 | -3.51236737  | 0.00546923  |
| NR_045021.1       | 126.1942946 | 688.9376437 | 2.448726723  | 0.00567029  |
| NR_125975.1       | 103.3591366 | 1.664100589 | -5.956779471 | 0.00572318  |
| NR_027164.1       | 192.296068  | 1127.428149 | 2.551634325  | 0.005839277 |
| ENST00000355500.1 | 81.72582891 | 0           | #NAME?       | 0.005846559 |
| ENST00000432171.2 | 81.72582891 | 0           | #NAME?       | 0.005846559 |
| ENST00000436249.3 | 81.72582891 | 0           | #NAME?       | 0.005846559 |
| ENST00000577140.1 | 81.72582891 | 0           | #NAME?       | 0.005846559 |
| NR_111907.1       | 81.72582891 | 0           | #NAME?       | 0.005846559 |
| NR_125820.1       | 81.72582891 | 0           | #NAME?       | 0.005846559 |
| NR_036482.1       | 42.06476488 | 292.8817036 | 2.799633885  | 0.005997033 |
| NR_024423.2       | 159.8461065 | 10.81665383 | -3.885357434 | 0.006039453 |
| ENST00000602635.1 | 171.8646108 | 13.31280471 | -3.690386053 | 0.006047399 |
| ENST00000510853.2 | 0           | 88.1973312  | Inf          | 0.006084507 |
| NR_138574.1       | 102.1572861 | 1.664100589 | -5.939905653 | 0.006167748 |
| NR_027118.1       | 115.3776408 | 3.328201177 | -5.115477217 | 0.006374617 |
| NR_026775.2       | 92.54248274 | 0.832050294 | -6.797301257 | 0.006391723 |

|                   |             |             |              |             |
|-------------------|-------------|-------------|--------------|-------------|
| NR_135123.1       | 92.54248274 | 0.832050294 | -6.797301257 | 0.006391723 |
| ENST00000554926.1 | 80.52397849 | 0           | #NAME?       | 0.006428634 |
| ENST00000582300.2 | 80.52397849 | 0           | #NAME?       | 0.006428634 |
| ENST00000608495.1 | 80.52397849 | 0           | #NAME?       | 0.006428634 |
| NR_002717.2       | 80.52397849 | 0           | #NAME?       | 0.006428634 |
| NR_120352.1       | 80.52397849 | 0           | #NAME?       | 0.006428634 |
| NR_121587.1       | 80.52397849 | 0           | #NAME?       | 0.006428634 |
| NR_027169.1       | 157.4424057 | 847.0271996 | 2.427584128  | 0.006443588 |
| NR_026911.1       | 0           | 87.36528091 | Inf          | 0.006445678 |
| NR_003142.2       | 1.201850425 | 101.5101359 | 6.400222621  | 0.006559605 |
| NR_003580.2       | 13.22035468 | 172.2344109 | 3.703540622  | 0.006567074 |
| ENST00000565521.1 | 135.809098  | 6.656402355 | -4.350693679 | 0.006584135 |
| NR_138572.1       | 100.9554357 | 1.664100589 | -5.922832139 | 0.006645738 |
| NR_045027.1       | 157.4424057 | 838.7066967 | 2.413342205  | 0.006702329 |
| NR_045028.1       | 157.4424057 | 838.7066967 | 2.413342205  | 0.006702329 |
| ENST00000366152.3 | 7.211102551 | 141.44855   | 4.293913719  | 0.006822734 |
| NR_027163.1       | 200.709021  | 1140.740954 | 2.506793847  | 0.006831748 |
| ENST00000587325.1 | 91.34063231 | 0.832050294 | -6.77844223  | 0.006915139 |
| NR_103853.1       | 91.34063231 | 0.832050294 | -6.77844223  | 0.006915139 |
| NR_027667.1       | 200.709021  | 1132.420451 | 2.496232342  | 0.006983318 |
| ENST00000568571.1 | 79.32212806 | 0           | #NAME?       | 0.007064792 |
| ENST00000593140.1 | 79.32212806 | 0           | #NAME?       | 0.007064792 |
| NR_029379.1       | 79.32212806 | 0           | #NAME?       | 0.007064792 |
| NR_034136.1       | 79.32212806 | 0           | #NAME?       | 0.007064792 |
| NR_103548.1       | 79.32212806 | 0           | #NAME?       | 0.007064792 |
| NR_109926.1       | 79.32212806 | 0           | #NAME?       | 0.007064792 |
| NR_135038.1       | 79.32212806 | 0           | #NAME?       | 0.007064792 |
| NR_110067.1       | 151.4331536 | 9.984603532 | -3.922832139 | 0.007178416 |
| NR_027159.1       | 199.5071706 | 1111.619193 | 2.478150144  | 0.007192816 |
| NR_036200.1       | 0           | 85.70118032 | Inf          | 0.007245622 |
| NR_109905.1       | 112.97394   | 3.328201177 | -5.085103568 | 0.00729251  |
| ENST00000581333.1 | 6.009252126 | 133.1280471 | 4.469485283  | 0.007360448 |
| NR_037857.1       | 90.13878189 | 0.832050294 | -6.759333407 | 0.007484809 |
| NR_045513.1       | 76.91842721 | 420.1853986 | 2.449624861  | 0.007514951 |
| NR_136672.1       | 112.97394   | 579.9390552 | 2.359911277  | 0.007640023 |
| NR_136674.1       | 112.97394   | 579.9390552 | 2.359911277  | 0.007640023 |
| NR_026966.1       | 210.3238244 | 24.12945854 | -3.123744833 | 0.007681536 |
| ENST00000587050.1 | 0           | 84.86913002 | Inf          | 0.007686587 |
| ENST00000574716.1 | 98.55173486 | 1.664100589 | -5.888066721 | 0.007711353 |
| NR_047672.1       | 21.63330765 | 203.0202718 | 3.230297619  | 0.007711363 |
| ENST00000451108.1 | 78.12027764 | 0           | #NAME?       | 0.007757024 |

|                   |             |             |              |             |
|-------------------|-------------|-------------|--------------|-------------|
| ENST00000496217.1 | 78.12027764 | 0           | #NAME?       | 0.007757024 |
| ENST00000584843.1 | 78.12027764 | 0           | #NAME?       | 0.007757024 |
| ENST00000608005.1 | 78.12027764 | 0           | #NAME?       | 0.007757024 |
| NR_027754.2       | 224.7460295 | 28.28971001 | -2.989946335 | 0.008034986 |
| NR_134267.1       | 192.296068  | 19.96920706 | -3.267480311 | 0.00805194  |
| NR_145325.1       | 283.6367003 | 44.0986656  | -2.685237311 | 0.008071204 |
| ENST00000534423.1 | 88.93693146 | 0.832050294 | -6.739968082 | 0.008107085 |
| NR_002829.1       | 88.93693146 | 0.832050294 | -6.739968082 | 0.008107085 |
| NR_026904.1       | 163.4516578 | 13.31280471 | -3.617977558 | 0.008273066 |
| NR_015449.1       | 80.52397849 | 426.841801  | 2.406211108  | 0.008331199 |
| NR_023385.1       | 80.52397849 | 426.841801  | 2.406211108  | 0.008331199 |
| ENST00000411790.1 | 76.91842721 | 0           | #NAME?       | 0.008517115 |
| ENST00000526796.2 | 76.91842721 | 0           | #NAME?       | 0.008517115 |
| ENST00000536529.1 | 76.91842721 | 0           | #NAME?       | 0.008517115 |
| ENST00000561674.1 | 76.91842721 | 0           | #NAME?       | 0.008517115 |
| NR_033201.2       | 76.91842721 | 0           | #NAME?       | 0.008517115 |
| NR_134308.1       | 76.91842721 | 0           | #NAME?       | 0.008517115 |
| NR_015415.1       | 48.07401701 | 297.8740054 | 2.631372966  | 0.008580532 |
| ENST00000504207.1 | 0           | 83.20502943 | Inf          | 0.008656823 |
| NR_125976.1       | 87.73508104 | 0.832050294 | -6.720339276 | 0.008789463 |
| NR_023384.1       | 81.72582891 | 426.841801  | 2.384837458  | 0.008843952 |
| ENST00000504773.1 | 96.14803401 | 1.664100589 | -5.852442812 | 0.008936944 |
| NR_024532.1       | 96.14803401 | 1.664100589 | -5.852442812 | 0.008936944 |
| NR_045116.1       | 52.88141871 | 312.8509107 | 2.564642516  | 0.009045472 |
| NR_027179.1       | 51.67956828 | 307.0265586 | 2.570697535  | 0.009275606 |
| ENST00000422519.1 | 75.71657678 | 0           | #NAME?       | 0.009362986 |
| ENST00000517714.1 | 75.71657678 | 0           | #NAME?       | 0.009362986 |
| ENST00000526305.1 | 75.71657678 | 0           | #NAME?       | 0.009362986 |
| ENST00000528009.1 | 75.71657678 | 0           | #NAME?       | 0.009362986 |
| ENST00000607218.1 | 75.71657678 | 0           | #NAME?       | 0.009362986 |
| NR_039986.1       | 75.71657678 | 0           | #NAME?       | 0.009362986 |
| NR_135094.1       | 75.71657678 | 0           | #NAME?       | 0.009362986 |
| NR_024405.1       | 152.635004  | 11.64870412 | -3.711844481 | 0.009389674 |
| ENST00000554640.1 | 108.1665383 | 3.328201177 | -5.022367813 | 0.009535108 |
| ENST00000450742.1 | 12.01850425 | 156.4254553 | 3.70214604   | 0.009631262 |
| NR_037715.1       | 85.33138019 | 434.3302536 | 2.34764416   | 0.009631418 |
| NR_027160.1       | 216.3330765 | 1134.084551 | 2.390202034  | 0.009678606 |
| ENST00000608142.1 | 0           | 81.54092885 | Inf          | 0.009752652 |
| ENST00000608345.1 | 0           | 81.54092885 | Inf          | 0.009752652 |
| NR_030231.1       | 0           | 81.54092885 | Inf          | 0.009752652 |
| NR_037656.1       | 56.48696998 | 319.507313  | 2.499858932  | 0.010156357 |

|                   |             |             |              |             |
|-------------------|-------------|-------------|--------------|-------------|
| NR_003111.2       | 106.9646878 | 3.328201177 | -5.006248148 | 0.01019356  |
| ENST00000522956.1 | 74.51472636 | 0           | #NAME?       | 0.010296618 |
| ENST00000588092.1 | 74.51472636 | 0           | #NAME?       | 0.010296618 |
| NR_002140.1       | 74.51472636 | 0           | #NAME?       | 0.010296618 |
| NR_110134.1       | 74.51472636 | 0           | #NAME?       | 0.010296618 |
| ENST00000548900.1 | 51.67956828 | 301.2022066 | 2.543066416  | 0.010323127 |
| NR_126390.1       | 161.047957  | 14.144855   | -3.509141066 | 0.010327158 |
| NR_138575.1       | 157.4424057 | 13.31280471 | -3.563937718 | 0.010348765 |
| ENST00000430048.1 | 85.33138019 | 0.832050294 | -6.680261836 | 0.01036795  |
| ENST00000550118.2 | 85.33138019 | 0.832050294 | -6.680261836 | 0.01036795  |
| NR_024618.1       | 85.33138019 | 0.832050294 | -6.680261836 | 0.01036795  |
| NR_045555.1       | 9.614803401 | 143.1126506 | 3.895750038  | 0.010577112 |
| NR_132417.1       | 13.22035468 | 158.9216062 | 3.587482493  | 0.010652989 |
| NR_136673.1       | 122.5887434 | 579.9390552 | 2.242074787  | 0.010867328 |
| NR_130950.1       | 133.4053972 | 8.320502943 | -4.003002488 | 0.01092809  |
| NR_105040.1       | 0           | 79.87682826 | Inf          | 0.010982245 |
| NR_037631.1       | 8.412952976 | 136.4562483 | 4.019682366  | 0.011031244 |
| NR_027162.1       | 224.7460295 | 1147.397356 | 2.351997565  | 0.011033784 |
| NR_105043.1       | 92.54248274 | 1.664100589 | -5.797301257 | 0.011109105 |
| NR_037716.1       | 58.89067083 | 322.0034639 | 2.450965195  | 0.011281773 |
| ENST00000424496.1 | 73.31287593 | 0           | #NAME?       | 0.011317629 |
| ENST00000563611.1 | 73.31287593 | 0           | #NAME?       | 0.011317629 |
| NR_029390.1       | 73.31287593 | 0           | #NAME?       | 0.011317629 |
| NR_110194.1       | 73.31287593 | 0           | #NAME?       | 0.011317629 |
| NR_110220.1       | 73.31287593 | 0           | #NAME?       | 0.011317629 |
| NR_122041.1       | 73.31287593 | 0           | #NAME?       | 0.011317629 |
| NR_122042.1       | 73.31287593 | 0           | #NAME?       | 0.011317629 |
| NR_136671.1       | 123.7905938 | 579.9390552 | 2.227999602  | 0.011328339 |
| NR_136211.1       | 132.2035468 | 616.5492681 | 2.221455302  | 0.011413806 |
| ENST00000557373.1 | 64.89992296 | 342.8047213 | 2.401098308  | 0.011450932 |
| NR_110069.1       | 132.2035468 | 8.320502943 | -3.989946335 | 0.011523109 |
| NR_027161.1       | 181.4794142 | 853.683602  | 2.23389556   | 0.011766981 |
| ENST00000560057.1 | 1.201850425 | 91.52553238 | 6.250844997  | 0.011864224 |
| NR_075092.1       | 109.3683887 | 4.160251472 | -4.716381262 | 0.01196414  |
| NR_109888.1       | 114.1757904 | 4.992301766 | -4.515407824 | 0.012009067 |
| ENST00000606511.1 | 54.08326913 | 300.3701563 | 2.473487214  | 0.01223708  |
| ENST00000605589.1 | 82.92767934 | 0.832050294 | -6.639039173 | 0.012267297 |
| NR_036493.1       | 179.0757133 | 19.96920706 | -3.164720736 | 0.012282909 |
| NR_103757.1       | 179.0757133 | 19.96920706 | -3.164720736 | 0.012282909 |
| ENST00000587645.1 | 0           | 78.21272767 | Inf          | 0.012351555 |
| ENST00000422414.1 | 72.11102551 | 0           | #NAME?       | 0.012422729 |



|                   |             |             |              |             |
|-------------------|-------------|-------------|--------------|-------------|
| ENST00000429666.1 | 72.11102551 | 0           | #NAME?       | 0.012422729 |
| ENST00000447149.1 | 72.11102551 | 0           | #NAME?       | 0.012422729 |
| ENST00000560662.1 | 72.11102551 | 0           | #NAME?       | 0.012422729 |
| ENST00000598700.1 | 72.11102551 | 0           | #NAME?       | 0.012422729 |
| NR_134486.1       | 72.11102551 | 0           | #NAME?       | 0.012422729 |
| NR_034033.1       | 141.8183502 | 10.81665383 | -3.712718048 | 0.012440197 |
| NR_104275.2       | 135.809098  | 617.3813184 | 2.184581698  | 0.012727421 |
| NR_104109.1       | 108.1665383 | 4.160251472 | -4.700439718 | 0.012750038 |
| ENST00000580671.1 | 12.01850425 | 148.9370027 | 3.631372966  | 0.012757462 |
| NR_136212.1       | 127.3961451 | 579.9390552 | 2.186579675  | 0.012792694 |
| NR_137639.1       | 58.89067083 | 314.5150113 | 2.417017863  | 0.012798492 |
| NR_103718.1       | 90.13878189 | 1.664100589 | -5.759333407 | 0.012838677 |
| NR_006880.1       | 304.0681576 | 1959.478443 | 2.688003053  | 0.012965028 |
| NR_033242.1       | 18.02775638 | 172.2344109 | 3.256081645  | 0.013061707 |
| NR_110542.1       | 7.211102551 | 126.4716447 | 4.132450296  | 0.013264899 |
| ENST00000431181.1 | 81.72582891 | 0.832050294 | -6.617977558 | 0.013349225 |
| NR_135611.1       | 81.72582891 | 0.832050294 | -6.617977558 | 0.013349225 |
| NR_136692.1       | 81.72582891 | 0.832050294 | -6.617977558 | 0.013349225 |
| NR_136693.1       | 81.72582891 | 0.832050294 | -6.617977558 | 0.013349225 |
| NR_015361.1       | 116.5794912 | 5.82435206  | -4.323072637 | 0.013356401 |
| NR_049728.1       | 40.86291446 | 250.4471386 | 2.615642119  | 0.013505237 |
| NR_110066.1       | 128.5979955 | 8.320502943 | -3.950053608 | 0.013511678 |
| NR_104313.1       | 150.2313031 | 13.31280471 | -3.496299001 | 0.013534938 |
| ENST00000414383.1 | 70.90917508 | 0           | #NAME?       | 0.013604955 |
| ENST00000444114.1 | 70.90917508 | 0           | #NAME?       | 0.013604955 |
| ENST00000506638.1 | 70.90917508 | 0           | #NAME?       | 0.013604955 |
| ENST00000537157.1 | 70.90917508 | 0           | #NAME?       | 0.013604955 |
| ENST00000564508.1 | 70.90917508 | 0           | #NAME?       | 0.013604955 |
| ENST00000569710.1 | 70.90917508 | 0           | #NAME?       | 0.013604955 |
| ENST00000583161.1 | 70.90917508 | 0           | #NAME?       | 0.013604955 |
| ENST00000586383.1 | 70.90917508 | 0           | #NAME?       | 0.013604955 |
| ENST00000596622.1 | 70.90917508 | 0           | #NAME?       | 0.013604955 |
| NR_132983.1       | 70.90917508 | 0           | #NAME?       | 0.013604955 |
| NR_026877.1       | 88.93693146 | 1.664100589 | -5.739968082 | 0.013809189 |
| NR_003281.1       | 38.4592136  | 241.2945854 | 2.649394373  | 0.013846292 |
| NR_033759.1       | 169.4609099 | 758.8298684 | 2.162823945  | 0.013852008 |
| NR_030326.1       | 2.40370085  | 98.18193473 | 5.352128333  | 0.014114881 |
| ENST00000567261.1 | 15.62405553 | 160.5857068 | 3.361502602  | 0.014174265 |
| ENST00000439913.1 | 94.94618359 | 2.496150883 | -5.249332964 | 0.014398481 |
| ENST00000425008.3 | 80.52397849 | 0.832050294 | -6.596603907 | 0.014525117 |
| ENST00000593427.1 | 80.52397849 | 0.832050294 | -6.596603907 | 0.014525117 |

|                   |             |             |              |             |
|-------------------|-------------|-------------|--------------|-------------|
| ENST00000435612.1 | 69.70732466 | 0           | #NAME?       | 0.014851709 |
| ENST00000436739.1 | 69.70732466 | 0           | #NAME?       | 0.014851709 |
| ENST00000453491.1 | 69.70732466 | 0           | #NAME?       | 0.014851709 |
| ENST00000503478.1 | 69.70732466 | 0           | #NAME?       | 0.014851709 |
| ENST00000514265.1 | 69.70732466 | 0           | #NAME?       | 0.014851709 |
| ENST00000531414.1 | 69.70732466 | 0           | #NAME?       | 0.014851709 |
| ENST00000558730.2 | 69.70732466 | 0           | #NAME?       | 0.014851709 |
| ENST00000563223.1 | 69.70732466 | 0           | #NAME?       | 0.014851709 |
| NR_026547.1       | 69.70732466 | 0           | #NAME?       | 0.014851709 |
| NR_033985.1       | 69.70732466 | 0           | #NAME?       | 0.014851709 |
| NR_077243.1       | 69.70732466 | 0           | #NAME?       | 0.014851709 |
| NR_103532.1       | 69.70732466 | 0           | #NAME?       | 0.014851709 |
| NR_120353.1       | 69.70732466 | 0           | #NAME?       | 0.014851709 |
| NR_135856.1       | 87.73508104 | 1.664100589 | -5.720339276 | 0.01486256  |
| NR_136633.1       | 157.4424057 | 15.80895559 | -3.316010205 | 0.014927934 |
| NR_104578.1       | 34.85366233 | 225.4856298 | 2.69365333   | 0.015157675 |
| ENST00000608187.1 | 1.201850425 | 87.36528091 | 6.183730801  | 0.015198374 |
| ENST00000427824.1 | 275.2237474 | 50.75506795 | -2.438981167 | 0.015248497 |
| ENST00000503553.3 | 7.211102551 | 123.1434436 | 4.093976148  | 0.015386419 |
| ENST00000448013.1 | 6.009252126 | 117.3190915 | 4.287108541  | 0.015416633 |
| ENST00000434237.1 | 0           | 74.88452649 | Inf          | 0.015645089 |
| ENST00000518178.1 | 0           | 74.88452649 | Inf          | 0.015645089 |
| ENST00000609363.1 | 0           | 74.88452649 | Inf          | 0.015645089 |
| ENST00000587526.1 | 79.32212806 | 0.832050294 | -6.574908836 | 0.015798492 |
| NR_130712.1       | 79.32212806 | 0.832050294 | -6.574908836 | 0.015798492 |
| NR_138133.1       | 128.5979955 | 9.152553238 | -3.812550084 | 0.015907375 |
| NR_103870.1       | 66.10177338 | 325.3316651 | 2.299150367  | 0.016044306 |
| NR_134325.1       | 14.4222051  | 152.2652039 | 3.400222621  | 0.016100373 |
| ENST00000430931.1 | 68.50547423 | 0           | #NAME?       | 0.016148845 |
| ENST00000432925.1 | 68.50547423 | 0           | #NAME?       | 0.016148845 |
| ENST00000443870.1 | 68.50547423 | 0           | #NAME?       | 0.016148845 |
| ENST00000558221.1 | 68.50547423 | 0           | #NAME?       | 0.016148845 |
| ENST00000559614.2 | 68.50547423 | 0           | #NAME?       | 0.016148845 |
| ENST00000568286.1 | 68.50547423 | 0           | #NAME?       | 0.016148845 |
| ENST00000570073.2 | 68.50547423 | 0           | #NAME?       | 0.016148845 |
| ENST00000588469.1 | 68.50547423 | 0           | #NAME?       | 0.016148845 |
| ENST00000604086.1 | 68.50547423 | 0           | #NAME?       | 0.016148845 |
| NR_110558.1       | 68.50547423 | 0           | #NAME?       | 0.016148845 |
| NR_135562.1       | 68.50547423 | 0           | #NAME?       | 0.016148845 |
| NR_024254.1       | 28.8444102  | 203.0202718 | 2.81526012   | 0.016191201 |
| NR_135576.1       | 28.8444102  | 203.0202718 | 2.81526012   | 0.016191201 |

|                   |             |             |              |             |
|-------------------|-------------|-------------|--------------|-------------|
| NR_136635.1       | 155.0387048 | 15.80895559 | -3.293814459 | 0.01623566  |
| ENST00000607047.1 | 43.26661531 | 249.6150883 | 2.528378972  | 0.016325212 |
| NR_026846.1       | 36.05551275 | 226.3176801 | 2.650057529  | 0.016329694 |
| ENST00000582564.1 | 116.5794912 | 6.656402355 | -4.130427559 | 0.016332992 |
| NR_136613.1       | 158.6442561 | 679.7850905 | 2.099283432  | 0.016343991 |
| NR_024267.1       | 92.54248274 | 2.496150883 | -5.212338757 | 0.016485163 |
| NR_033406.1       | 276.4255978 | 52.41916854 | -2.398724844 | 0.016542705 |
| NR_138132.1       | 175.4701621 | 21.63330765 | -3.019899557 | 0.016628188 |
| NR_138131.1       | 169.4609099 | 19.96920706 | -3.085103568 | 0.016701217 |
| NR_110068.1       | 123.7905938 | 8.320502943 | -3.895087149 | 0.016709555 |
| NR_036486.1       | 85.33138019 | 386.9033869 | 2.18082507   | 0.0170836   |
| ENST00000580996.1 | 76.91842721 | 357.7816266 | 2.217678133  | 0.017085528 |
| NR_131765.1       | 140.6164997 | 12.48075442 | -3.493988841 | 0.017135572 |
| ENST00000413483.1 | 78.12027764 | 0.832050294 | -6.55288253  | 0.017171932 |
| NR_103835.1       | 78.12027764 | 0.832050294 | -6.55288253  | 0.017171932 |
| NR_003654.2       | 174.2683116 | 21.63330765 | -3.009984089 | 0.017257675 |
| NR_028502.1       | 118.9831921 | 7.488452649 | -3.989946335 | 0.017514334 |
| ENST00000422038.1 | 67.30362381 | 0           | #NAME?       | 0.017522084 |
| ENST00000436877.2 | 67.30362381 | 0           | #NAME?       | 0.017522084 |
| ENST00000444804.1 | 67.30362381 | 0           | #NAME?       | 0.017522084 |
| ENST00000449958.1 | 67.30362381 | 0           | #NAME?       | 0.017522084 |
| ENST00000452363.1 | 67.30362381 | 0           | #NAME?       | 0.017522084 |
| ENST00000502427.1 | 67.30362381 | 0           | #NAME?       | 0.017522084 |
| ENST00000507023.1 | 67.30362381 | 0           | #NAME?       | 0.017522084 |
| ENST00000507627.1 | 67.30362381 | 0           | #NAME?       | 0.017522084 |
| ENST00000525363.1 | 67.30362381 | 0           | #NAME?       | 0.017522084 |
| ENST00000568931.1 | 67.30362381 | 0           | #NAME?       | 0.017522084 |
| ENST00000580253.1 | 67.30362381 | 0           | #NAME?       | 0.017522084 |
| ENST00000597284.1 | 67.30362381 | 0           | #NAME?       | 0.017522084 |
| NR_104274.2       | 111.7720895 | 480.0930198 | 2.102753981  | 0.017565588 |
| ENST00000565382.1 | 14.4222051  | 149.769053  | 3.376375879  | 0.01758057  |
| NR_136206.1       | 129.7998459 | 549.1531943 | 2.080919995  | 0.01759505  |
| ENST00000569431.1 | 173.0664612 | 21.63330765 | -3           | 0.017910869 |
| NR_125363.1       | 30.04626063 | 203.0202718 | 2.756366431  | 0.017974203 |
| NR_073026.1       | 39.66106403 | 232.9740824 | 2.554374181  | 0.018287675 |
| ENST00000599835.1 | 15.62405553 | 153.0972542 | 3.292607521  | 0.018321903 |
| ENST00000563140.1 | 132.2035468 | 10.81665383 | -3.611434712 | 0.018332619 |
| NR_037657.1       | 46.87216658 | 255.4394404 | 2.44617791   | 0.018376825 |
| NR_132969.1       | 86.53323061 | 385.2392863 | 2.154428665  | 0.018377415 |
| NR_121674.1       | 96.14803401 | 3.328201177 | -4.852442812 | 0.018457679 |
| ENST00000537019.1 | 128.5979955 | 9.984603532 | -3.687019202 | 0.01847367  |

|                   |             |             |              |             |
|-------------------|-------------|-------------|--------------|-------------|
| NR_026679.1       | 199.5071706 | 29.9538106  | -2.735629147 | 0.01855031  |
| ENST00000529377.1 | 3.605551275 | 100.6780856 | 4.80338602   | 0.01860769  |
| ENST00000563613.1 | 76.91842721 | 0.832050294 | -6.530514717 | 0.018647817 |
| NR_121606.1       | 0           | 72.38837561 | Inf          | 0.018675638 |
| NR_039777.1       | 8.412952976 | 123.9754939 | 3.881298882  | 0.01876053  |
| NR_144463.1       | 277.6274482 | 54.91531943 | -2.337869639 | 0.018797615 |
| ENST00000576014.1 | 159.8461065 | 18.30510648 | -3.126365534 | 0.018828401 |
| NR_130152.1       | 78.12027764 | 354.4534254 | 2.18182709   | 0.018919115 |
| ENST00000411431.1 | 66.10177338 | 0           | #NAME?       | 0.019014051 |
| ENST00000414640.1 | 66.10177338 | 0           | #NAME?       | 0.019014051 |
| ENST00000532625.1 | 66.10177338 | 0           | #NAME?       | 0.019014051 |
| ENST00000541495.1 | 66.10177338 | 0           | #NAME?       | 0.019014051 |
| ENST00000565625.1 | 66.10177338 | 0           | #NAME?       | 0.019014051 |
| ENST00000590240.1 | 66.10177338 | 0           | #NAME?       | 0.019014051 |
| NR_004428.1       | 66.10177338 | 0           | #NAME?       | 0.019014051 |
| NR_034023.1       | 66.10177338 | 0           | #NAME?       | 0.019014051 |
| NR_037856.1       | 66.10177338 | 0           | #NAME?       | 0.019014051 |
| NR_105053.2       | 66.10177338 | 0           | #NAME?       | 0.019014051 |
| NR_138049.1       | 66.10177338 | 0           | #NAME?       | 0.019014051 |
| NR_024075.1       | 168.2590595 | 20.80125736 | -3.015941544 | 0.019025691 |
| NR_109965.1       | 189.8923672 | 27.45765971 | -2.789901346 | 0.019346114 |
| NR_047582.1       | 22.83515808 | 176.3946624 | 2.949478224  | 0.019516181 |
| NR_038242.1       | 146.6257519 | 14.9769053  | -3.291327053 | 0.019558506 |
| NR_073130.1       | 94.94618359 | 3.328201177 | -4.834295465 | 0.019692914 |
| ENST00000533672.1 | 0           | 71.55632531 | Inf          | 0.019783344 |
| NR_037874.1       | 33.6518119  | 210.5087245 | 2.645123936  | 0.019908566 |
| NR_130761.1       | 85.33138019 | 373.5905822 | 2.130309799  | 0.020218383 |
| ENST00000565272.1 | 75.71657678 | 0.832050294 | -6.50779464  | 0.02026075  |
| NR_136634.1       | 209.121974  | 34.11406207 | -2.615906208 | 0.020355269 |
| NR_024080.1       | 68.50547423 | 317.8432124 | 2.214024097  | 0.020402454 |
| NR_135165.1       | 39.66106403 | 227.9817806 | 2.523123247  | 0.020482884 |
| NR_027347.1       | 75.71657678 | 340.3085704 | 2.168162393  | 0.020642574 |
| NR_028062.1       | 16.82590595 | 153.9293045 | 3.193511822  | 0.020642926 |
| NR_135904.1       | 10.81665383 | 131.4639465 | 3.60334103   | 0.020674686 |
| ENST00000438195.1 | 64.89992296 | 0           | #NAME?       | 0.020675906 |
| ENST00000452342.2 | 64.89992296 | 0           | #NAME?       | 0.020675906 |
| ENST00000484222.1 | 64.89992296 | 0           | #NAME?       | 0.020675906 |
| ENST00000519689.1 | 64.89992296 | 0           | #NAME?       | 0.020675906 |
| ENST00000524085.2 | 64.89992296 | 0           | #NAME?       | 0.020675906 |
| ENST00000526694.1 | 64.89992296 | 0           | #NAME?       | 0.020675906 |
| ENST00000553381.1 | 64.89992296 | 0           | #NAME?       | 0.020675906 |

|                   |             |             |              |             |
|-------------------|-------------|-------------|--------------|-------------|
| ENST00000562873.1 | 64.89992296 | 0           | #NAME?       | 0.020675906 |
| ENST00000583442.1 | 64.89992296 | 0           | #NAME?       | 0.020675906 |
| ENST00000602652.1 | 64.89992296 | 0           | #NAME?       | 0.020675906 |
| ENST00000603154.1 | 64.89992296 | 0           | #NAME?       | 0.020675906 |
| NR_033829.1       | 64.89992296 | 0           | #NAME?       | 0.020675906 |
| NR_046165.1       | 64.89992296 | 0           | #NAME?       | 0.020675906 |
| NR_046224.1       | 64.89992296 | 0           | #NAME?       | 0.020675906 |
| NR_046225.1       | 64.89992296 | 0           | #NAME?       | 0.020675906 |
| NR_110236.1       | 64.89992296 | 0           | #NAME?       | 0.020675906 |
| NR_121569.2       | 64.89992296 | 0           | #NAME?       | 0.020675906 |
| NR_126463.1       | 64.89992296 | 0           | #NAME?       | 0.020675906 |
| NR_130916.1       | 64.89992296 | 0           | #NAME?       | 0.020675906 |
| ENST00000544842.1 | 103.3591366 | 4.992301766 | -4.371816971 | 0.020747513 |
| NR_003602.3       | 6.009252126 | 110.6626891 | 4.202839624  | 0.021022424 |
| NR_126403.1       | 81.72582891 | 1.664100589 | -5.617977558 | 0.021729148 |
| ENST00000602730.1 | 140.6164997 | 14.144855   | -3.313416595 | 0.021737485 |
| ENST00000455973.1 | 1.201850425 | 81.54092885 | 6.084195127  | 0.021832659 |
| NR_039755.1       | 1.201850425 | 81.54092885 | 6.084195127  | 0.021832659 |
| NR_038244.1       | 74.51472636 | 0.832050294 | -6.484711027 | 0.022028484 |
| NR_120394.1       | 74.51472636 | 0.832050294 | -6.484711027 | 0.022028484 |
| NR_136621.1       | 74.51472636 | 0.832050294 | -6.484711027 | 0.022028484 |
| ENST00000456563.1 | 0           | 69.89222472 | Inf          | 0.022118069 |
| ENST00000554105.1 | 21.63330765 | 168.0741595 | 2.957771765  | 0.022215687 |
| ENST00000452377.1 | 92.54248274 | 3.328201177 | -4.797301257 | 0.022379382 |
| NR_073050.1       | 121.3868929 | 488.4135228 | 2.008490494  | 0.022525688 |
| ENST00000563434.1 | 123.7905938 | 9.984603532 | -3.632052743 | 0.02255762  |
| ENST00000413541.1 | 63.69807253 | 0           | #NAME?       | 0.022578002 |
| ENST00000435967.1 | 63.69807253 | 0           | #NAME?       | 0.022578002 |
| ENST00000439494.1 | 63.69807253 | 0           | #NAME?       | 0.022578002 |
| ENST00000446543.1 | 63.69807253 | 0           | #NAME?       | 0.022578002 |
| ENST00000447277.1 | 63.69807253 | 0           | #NAME?       | 0.022578002 |
| ENST00000450473.1 | 63.69807253 | 0           | #NAME?       | 0.022578002 |
| ENST00000510240.1 | 63.69807253 | 0           | #NAME?       | 0.022578002 |
| ENST00000525429.1 | 63.69807253 | 0           | #NAME?       | 0.022578002 |
| ENST00000556919.1 | 63.69807253 | 0           | #NAME?       | 0.022578002 |
| ENST00000564852.1 | 63.69807253 | 0           | #NAME?       | 0.022578002 |
| ENST00000575890.1 | 63.69807253 | 0           | #NAME?       | 0.022578002 |
| ENST00000579499.1 | 63.69807253 | 0           | #NAME?       | 0.022578002 |
| NR_015425.1       | 63.69807253 | 0           | #NAME?       | 0.022578002 |
| NR_039974.1       | 63.69807253 | 0           | #NAME?       | 0.022578002 |
| NR_103533.1       | 63.69807253 | 0           | #NAME?       | 0.022578002 |

|                   |             |             |              |             |
|-------------------|-------------|-------------|--------------|-------------|
| NR_104294.1       | 63.69807253 | 0           | #NAME?       | 0.022578002 |
| NR_109989.1       | 63.69807253 | 0           | #NAME?       | 0.022578002 |
| NR_110540.1       | 63.69807253 | 0           | #NAME?       | 0.022578002 |
| NR_120635.1       | 63.69807253 | 0           | #NAME?       | 0.022578002 |
| NR_132438.1       | 63.69807253 | 0           | #NAME?       | 0.022578002 |
| NR_144514.1       | 63.69807253 | 0           | #NAME?       | 0.022578002 |
| NR_134312.1       | 4.807401701 | 103.1742365 | 4.423681594  | 0.022728785 |
| ENST00000580770.1 | 67.30362381 | 307.0265586 | 2.189607367  | 0.022794952 |
| NR_039695.1       | 9.614803401 | 123.9754939 | 3.688653804  | 0.023071535 |
| ENST00000557304.1 | 0           | 69.06017443 | Inf          | 0.023328564 |
| NR_103871.1       | 74.51472636 | 327.827816  | 2.137340792  | 0.023390795 |
| NR_073046.1       | 122.5887434 | 488.4135228 | 1.994276634  | 0.023410076 |
| NR_073048.1       | 122.5887434 | 488.4135228 | 1.994276634  | 0.023410076 |
| NR_073049.1       | 122.5887434 | 488.4135228 | 1.994276634  | 0.023410076 |
| NR_073052.1       | 115.3776408 | 461.7879134 | 2.000866744  | 0.023691797 |
| NR_027715.1       | 152.635004  | 18.30510648 | -3.059767785 | 0.023880028 |
| NR_002787.2       | 73.31287593 | 0.832050294 | -6.461252054 | 0.023949344 |
| NR_027417.1       | 73.31287593 | 0.832050294 | -6.461252054 | 0.023949344 |
| NR_038291.1       | 73.31287593 | 0.832050294 | -6.461252054 | 0.023949344 |
| NR_110822.1       | 73.31287593 | 0.832050294 | -6.461252054 | 0.023949344 |
| NR_122040.1       | 73.31287593 | 0.832050294 | -6.461252054 | 0.023949344 |
| NR_103442.1       | 128.5979955 | 11.64870412 | -3.464626781 | 0.024097334 |
| NR_024205.1       | 26.44070935 | 180.5549139 | 2.771604897  | 0.02420601  |
| NR_024206.1       | 26.44070935 | 180.5549139 | 2.771604897  | 0.02420601  |
| NR_125960.1       | 108.1665383 | 6.656402355 | -4.022367813 | 0.02423258  |
| NR_125367.1       | 243.9756363 | 48.25891707 | -2.337869639 | 0.024403382 |
| NR_103726.1       | 115.3776408 | 457.6276619 | 1.987810591  | 0.024660393 |
| ENST00000418607.2 | 62.49622211 | 0           | #NAME?       | 0.024737905 |
| ENST00000430537.1 | 62.49622211 | 0           | #NAME?       | 0.024737905 |
| ENST00000462717.1 | 62.49622211 | 0           | #NAME?       | 0.024737905 |
| ENST00000529127.1 | 62.49622211 | 0           | #NAME?       | 0.024737905 |
| ENST00000559026.1 | 62.49622211 | 0           | #NAME?       | 0.024737905 |
| ENST00000559979.1 | 62.49622211 | 0           | #NAME?       | 0.024737905 |
| ENST00000601506.1 | 62.49622211 | 0           | #NAME?       | 0.024737905 |
| NR_024259.1       | 62.49622211 | 0           | #NAME?       | 0.024737905 |
| NR_033983.1       | 62.49622211 | 0           | #NAME?       | 0.024737905 |
| NR_077225.1       | 62.49622211 | 0           | #NAME?       | 0.024737905 |
| NR_110089.1       | 62.49622211 | 0           | #NAME?       | 0.024737905 |
| NR_125964.1       | 127.3961451 | 11.64870412 | -3.451080249 | 0.025262279 |
| NR_121579.1       | 79.32212806 | 1.664100589 | -5.574908836 | 0.025342643 |
| NR_004053.3       | 90.13878189 | 3.328201177 | -4.759333407 | 0.025402409 |

|                   |             |             |              |             |
|-------------------|-------------|-------------|--------------|-------------|
| NR_136411.1       | 90.13878189 | 3.328201177 | -4.759333407 | 0.025402409 |
| NR_144379.1       | 217.534927  | 39.93841413 | -2.445398103 | 0.025424883 |
| NR_038241.1       | 147.8276023 | 17.47305618 | -3.080711799 | 0.025493051 |
| NR_038406.1       | 114.1757904 | 8.320502943 | -3.77844223  | 0.0255167   |
| NR_136560.1       | 18.02775638 | 151.4331536 | 3.070389328  | 0.025684857 |
| ENST00000425554.1 | 31.24811105 | 193.0356683 | 2.62702656   | 0.025708389 |
| NR_026824.1       | 129.7998459 | 12.48075442 | -3.378511623 | 0.025924677 |
| ENST00000568928.1 | 72.11102551 | 0.832050294 | -6.437405312 | 0.026017216 |
| ENST00000576751.1 | 72.11102551 | 0.832050294 | -6.437405312 | 0.026017216 |
| NR_028492.1       | 72.11102551 | 0.832050294 | -6.437405312 | 0.026017216 |
| NR_144381.1       | 216.3330765 | 39.93841413 | -2.437405312 | 0.026140176 |
| ENST00000568421.1 | 120.1850425 | 9.984603532 | -3.589408406 | 0.02619659  |
| NR_135275.1       | 191.0942176 | 730.5401584 | 1.934679458  | 0.026500968 |
| NR_045026.1       | 75.71657678 | 322.8355142 | 2.092118202  | 0.026572308 |
| NR_110708.1       | 45.67031616 | 233.8061327 | 2.35598409   | 0.026723998 |
| ENST00000484429.2 | 10.81665383 | 124.8075442 | 3.528378972  | 0.026847636 |
| NR_134923.1       | 102.1572861 | 5.82435206  | -4.132550731 | 0.026882479 |
| ENST00000456384.1 | 1.201850425 | 78.21272767 | 6.024074135  | 0.026883536 |
| NR_003569.1       | 112.97394   | 8.320502943 | -3.763175473 | 0.026895776 |
| NR_027019.1       | 112.97394   | 8.320502943 | -3.763175473 | 0.026895776 |
| NR_111939.1       | 88.93693146 | 3.328201177 | -4.739968082 | 0.027063203 |
| NR_003276.2       | 18.02775638 | 149.769053  | 3.054447784  | 0.027107032 |
| ENST00000437035.1 | 61.29437168 | 0           | #NAME?       | 0.027140323 |
| ENST00000451295.1 | 61.29437168 | 0           | #NAME?       | 0.027140323 |
| ENST00000504249.1 | 61.29437168 | 0           | #NAME?       | 0.027140323 |
| ENST00000522173.1 | 61.29437168 | 0           | #NAME?       | 0.027140323 |
| ENST00000547399.1 | 61.29437168 | 0           | #NAME?       | 0.027140323 |
| ENST00000566945.1 | 61.29437168 | 0           | #NAME?       | 0.027140323 |
| ENST00000600865.1 | 61.29437168 | 0           | #NAME?       | 0.027140323 |
| ENST00000609089.1 | 61.29437168 | 0           | #NAME?       | 0.027140323 |
| NR_001447.2       | 61.29437168 | 0           | #NAME?       | 0.027140323 |
| NR_023916.1       | 61.29437168 | 0           | #NAME?       | 0.027140323 |
| NR_046793.1       | 61.29437168 | 0           | #NAME?       | 0.027140323 |
| NR_110681.1       | 61.29437168 | 0           | #NAME?       | 0.027140323 |
| ENST00000452840.1 | 128.5979955 | 12.48075442 | -3.365091107 | 0.027144909 |
| NR_033984.1       | 185.0849655 | 29.9538106  | -2.627376256 | 0.027288263 |
| NR_024592.1       | 164.6535082 | 23.29740824 | -2.821191878 | 0.02731852  |
| NR_040012.1       | 78.12027764 | 1.664100589 | -5.55288253  | 0.027352253 |
| NR_125727.1       | 78.12027764 | 1.664100589 | -5.55288253  | 0.027352253 |
| NR_125728.1       | 78.12027764 | 1.664100589 | -5.55288253  | 0.027352253 |
| NR_125729.1       | 78.12027764 | 1.664100589 | -5.55288253  | 0.027352253 |

|                   |             |             |              |             |
|-------------------|-------------|-------------|--------------|-------------|
| NR_132114.1       | 78.12027764 | 1.664100589 | -5.55288253  | 0.027352253 |
| NR_132995.1       | 78.12027764 | 1.664100589 | -5.55288253  | 0.027352253 |
| ENST00000427333.1 | 19.2296068  | 153.0972542 | 2.993047239  | 0.027658924 |
| ENST00000558382.1 | 7.211102551 | 109.8306389 | 3.928916902  | 0.027783376 |
| NR_110624.1       | 97.34988444 | 4.992301766 | -4.285402219 | 0.027963505 |
| ENST00000429443.1 | 70.90917508 | 0.832050294 | -6.413157766 | 0.028220536 |
| ENST00000440689.1 | 70.90917508 | 0.832050294 | -6.413157766 | 0.028220536 |
| NR_028594.1       | 70.90917508 | 0.832050294 | -6.413157766 | 0.028220536 |
| NR_038905.1       | 70.90917508 | 0.832050294 | -6.413157766 | 0.028220536 |
| NR_108094.1       | 70.90917508 | 0.832050294 | -6.413157766 | 0.028220536 |
| NR_036581.1       | 111.7720895 | 8.320502943 | -3.747745433 | 0.028346882 |
| NR_073131.1       | 118.9831921 | 455.131511  | 1.935525686  | 0.028394945 |
| NR_135525.1       | 6.009252126 | 104.0062868 | 4.113341473  | 0.028588422 |
| ENST00000602731.1 | 0           | 65.73197325 | Inf          | 0.028669855 |
| NR_027146.1       | 129.7998459 | 13.31280471 | -3.285402219 | 0.029012726 |
| ENST00000418442.1 | 2.40370085  | 84.86913002 | 5.141910625  | 0.029025722 |
| NR_138038.1       | 2.40370085  | 84.86913002 | 5.141910625  | 0.029025722 |
| NR_073070.1       | 81.72582891 | 334.4842183 | 2.033074133  | 0.029182324 |
| ENST00000440456.1 | 8.412952976 | 113.15884   | 3.749593202  | 0.029700217 |
| NR_003141.3       | 8.412952976 | 113.15884   | 3.749593202  | 0.029700217 |
| NR_104231.1       | 76.91842721 | 318.6752627 | 2.050685865  | 0.029767269 |
| ENST00000342963.2 | 60.09252126 | 0           | #NAME?       | 0.029825116 |
| ENST00000414976.1 | 60.09252126 | 0           | #NAME?       | 0.029825116 |
| ENST00000416555.1 | 60.09252126 | 0           | #NAME?       | 0.029825116 |
| ENST00000429095.1 | 60.09252126 | 0           | #NAME?       | 0.029825116 |
| ENST00000448379.1 | 60.09252126 | 0           | #NAME?       | 0.029825116 |
| ENST00000453636.1 | 60.09252126 | 0           | #NAME?       | 0.029825116 |
| ENST00000453876.1 | 60.09252126 | 0           | #NAME?       | 0.029825116 |
| ENST00000455357.1 | 60.09252126 | 0           | #NAME?       | 0.029825116 |
| ENST00000526741.1 | 60.09252126 | 0           | #NAME?       | 0.029825116 |
| ENST00000553435.1 | 60.09252126 | 0           | #NAME?       | 0.029825116 |
| ENST00000560487.1 | 60.09252126 | 0           | #NAME?       | 0.029825116 |
| ENST00000561876.1 | 60.09252126 | 0           | #NAME?       | 0.029825116 |
| ENST00000586779.1 | 60.09252126 | 0           | #NAME?       | 0.029825116 |
| ENST00000609130.1 | 60.09252126 | 0           | #NAME?       | 0.029825116 |
| NR_002837.1       | 60.09252126 | 0           | #NAME?       | 0.029825116 |
| NR_027310.2       | 60.09252126 | 0           | #NAME?       | 0.029825116 |
| NR_033998.1       | 60.09252126 | 0           | #NAME?       | 0.029825116 |
| NR_038445.1       | 60.09252126 | 0           | #NAME?       | 0.029825116 |
| NR_110179.1       | 60.09252126 | 0           | #NAME?       | 0.029825116 |
| NR_126356.1       | 60.09252126 | 0           | #NAME?       | 0.029825116 |



|                   |             |             |              |             |
|-------------------|-------------|-------------|--------------|-------------|
| ENST00000593324.2 | 13.22035468 | 130.6318962 | 3.304674414  | 0.029860937 |
| NR_138056.1       | 110.5702391 | 8.320502943 | -3.732148578 | 0.029873402 |
| ENST00000557962.1 | 33.6518119  | 193.8677186 | 2.526316506  | 0.03013197  |
| NR_073570.1       | 28.8444102  | 179.7228636 | 2.639410285  | 0.030227997 |
| ENST00000568063.1 | 158.6442561 | 22.46535795 | -2.820021334 | 0.030265155 |
| NR_130762.1       | 94.94618359 | 371.9264816 | 1.969835556  | 0.030313418 |
| NR_045024.1       | 75.71657678 | 313.682961  | 2.050626073  | 0.030402416 |
| NR_023351.2       | 122.5887434 | 11.64870412 | -3.395585137 | 0.03050946  |
| ENST00000425370.1 | 26.44070935 | 172.2344109 | 2.703540622  | 0.030516431 |
| ENST00000469312.2 | 69.70732466 | 0.832050294 | -6.388495712 | 0.030541221 |
| ENST00000583558.1 | 69.70732466 | 0.832050294 | -6.388495712 | 0.030541221 |
| ENST00000599026.1 | 69.70732466 | 0.832050294 | -6.388495712 | 0.030541221 |
| ENST00000437683.1 | 15.62405553 | 138.1203489 | 3.144084997  | 0.030594677 |
| ENST00000281228.8 | 81.72582891 | 2.496150883 | -5.033015057 | 0.030657071 |
| NR_135046.1       | 24.0370085  | 164.7459583 | 2.776913808  | 0.030722408 |
| ENST00000439798.1 | 8.412952976 | 112.3267897 | 3.738945958  | 0.0307627   |
| NR_110847.1       | 34.85366233 | 196.3638695 | 2.494147338  | 0.030856545 |
| NR_132971.1       | 104.560987  | 400.2161916 | 1.936434871  | 0.030900892 |
| ENST00000438872.1 | 28.8444102  | 178.8908133 | 2.632715632  | 0.030909349 |
| NR_132970.1       | 118.9831921 | 445.9789578 | 1.906217854  | 0.031001415 |
| NR_027175.1       | 76.91842721 | 315.3470616 | 2.035539321  | 0.031249875 |
| NR_122105.1       | 224.7460295 | 45.76276619 | -2.296049463 | 0.031425708 |
| NR_038938.1       | 2.40370085  | 83.20502943 | 5.113341473  | 0.031868691 |
| ENST00000561550.2 | 0           | 64.06787266 | Inf          | 0.03192788  |
| NR_103468.1       | 171.8646108 | 27.45765971 | -2.645991934 | 0.031960054 |
| NR_027486.1       | 174.2683116 | 28.28971001 | -2.622960965 | 0.032000415 |
| NR_037930.1       | 78.12027764 | 317.0111621 | 2.020764658  | 0.032104848 |
| ENST00000432558.1 | 51.67956828 | 241.2945854 | 2.223129619  | 0.032488047 |
| NR_045484.1       | 4.807401701 | 95.68578385 | 4.314975334  | 0.032568652 |
| ENST00000595783.1 | 132.2035468 | 14.9769053  | -3.141949429 | 0.032699717 |
| NR_040083.1       | 132.2035468 | 14.9769053  | -3.141949429 | 0.032699717 |
| ENST00000388909.4 | 58.89067083 | 0           | #NAME?       | 0.03284036  |
| ENST00000432987.1 | 58.89067083 | 0           | #NAME?       | 0.03284036  |
| ENST00000433005.1 | 58.89067083 | 0           | #NAME?       | 0.03284036  |
| ENST00000434988.1 | 58.89067083 | 0           | #NAME?       | 0.03284036  |
| ENST00000435254.1 | 58.89067083 | 0           | #NAME?       | 0.03284036  |
| ENST00000524348.1 | 58.89067083 | 0           | #NAME?       | 0.03284036  |
| ENST00000525871.1 | 58.89067083 | 0           | #NAME?       | 0.03284036  |
| ENST00000563062.1 | 58.89067083 | 0           | #NAME?       | 0.03284036  |
| ENST00000567753.1 | 58.89067083 | 0           | #NAME?       | 0.03284036  |
| ENST00000569670.1 | 58.89067083 | 0           | #NAME?       | 0.03284036  |

|                   |             |             |              |             |
|-------------------|-------------|-------------|--------------|-------------|
| ENST00000575772.1 | 58.89067083 | 0           | #NAME?       | 0.03284036  |
| ENST00000582718.1 | 58.89067083 | 0           | #NAME?       | 0.03284036  |
| ENST00000583916.1 | 58.89067083 | 0           | #NAME?       | 0.03284036  |
| ENST00000586251.1 | 58.89067083 | 0           | #NAME?       | 0.03284036  |
| ENST00000591225.1 | 58.89067083 | 0           | #NAME?       | 0.03284036  |
| ENST00000607902.1 | 58.89067083 | 0           | #NAME?       | 0.03284036  |
| ENST00000609636.1 | 58.89067083 | 0           | #NAME?       | 0.03284036  |
| NR_027030.1       | 58.89067083 | 0           | #NAME?       | 0.03284036  |
| NR_033204.2       | 58.89067083 | 0           | #NAME?       | 0.03284036  |
| NR_125786.1       | 58.89067083 | 0           | #NAME?       | 0.03284036  |
| NR_134920.1       | 58.89067083 | 0           | #NAME?       | 0.03284036  |
| ENST00000565137.1 | 36.05551275 | 197.1959198 | 2.451337937  | 0.032855929 |
| ENST00000429725.1 | 80.52397849 | 2.496150883 | -5.011641406 | 0.032923091 |
| NR_135259.1       | 80.52397849 | 2.496150883 | -5.011641406 | 0.032923091 |
| ENST00000607893.1 | 68.50547423 | 0.832050294 | -6.363404731 | 0.032948847 |
| NR_038272.1       | 68.50547423 | 0.832050294 | -6.363404731 | 0.032948847 |
| NR_132996.1       | 68.50547423 | 0.832050294 | -6.363404731 | 0.032948847 |
| NR_134249.1       | 68.50547423 | 0.832050294 | -6.363404731 | 0.032948847 |
| ENST00000419895.3 | 16.82590595 | 139.7844494 | 3.054447784  | 0.033043694 |
| ENST00000455680.1 | 84.12952976 | 331.9880674 | 1.980447203  | 0.033312442 |
| NR_036546.1       | 93.74433316 | 4.992301766 | -4.230954435 | 0.03336013  |
| NR_038193.2       | 3.605551275 | 89.02938149 | 4.625989769  | 0.033433063 |
| NR_028495.1       | 114.1757904 | 9.984603532 | -3.515407824 | 0.033577294 |
| NR_145129.1       | 45.67031616 | 222.9894789 | 2.28764696   | 0.033600833 |
| NR_104302.1       | 155.0387048 | 22.46535795 | -2.78685447  | 0.033748206 |
| ENST00000526655.1 | 12.01850425 | 123.1434436 | 3.357010554  | 0.033789966 |
| ENST00000474444.1 | 4.807401701 | 94.85373355 | 4.302375297  | 0.033880695 |
| NR_029837.1       | 4.807401701 | 94.85373355 | 4.302375297  | 0.033880695 |
| ENST00000505448.3 | 162.2498074 | 24.96150883 | -2.700439718 | 0.034039079 |
| ENST00000605955.1 | 131.0016963 | 14.9769053  | -3.12877404  | 0.034129194 |
| NR_132349.1       | 116.5794912 | 428.5059016 | 1.878001063  | 0.034132115 |
| NR_110745.1       | 122.5887434 | 12.48075442 | -3.296049463 | 0.034156426 |
| NR_126159.1       | 8.412952976 | 109.8306389 | 3.706524481  | 0.034175307 |
| NR_145130.1       | 45.67031616 | 222.1574286 | 2.282253702  | 0.034199622 |
| ENST00000565916.1 | 26.44070935 | 168.0741595 | 2.668265147  | 0.034256816 |
| ENST00000507363.1 | 144.222051  | 19.13715677 | -2.913843356 | 0.034304172 |
| NR_104201.1       | 106.9646878 | 397.7200407 | 1.89461866   | 0.034468427 |
| ENST00000425110.1 | 94.94618359 | 361.1098277 | 1.927255768  | 0.034576289 |
| NR_026938.2       | 149.0294527 | 20.80125736 | -2.840854837 | 0.03470905  |
| NR_120401.1       | 3.605551275 | 88.1973312  | 4.612443237  | 0.034838641 |
| NR_120306.1       | 10.81665383 | 118.1511418 | 3.449307401  | 0.034848668 |

|                   |             |             |              |             |
|-------------------|-------------|-------------|--------------|-------------|
| NR_138539.1       | 73.31287593 | 297.0419551 | 2.01852821   | 0.035205064 |
| ENST00000607241.1 | 28.8444102  | 173.8985115 | 2.591881915  | 0.035328542 |
| NR_002605.2       | 45.67031616 | 220.493328  | 2.271406319  | 0.035430025 |
| ENST00000423869.1 | 67.30362381 | 0.832050294 | -6.337869639 | 0.035434067 |
| ENST00000601363.1 | 67.30362381 | 0.832050294 | -6.337869639 | 0.035434067 |
| ENST00000608402.1 | 20.43145723 | 148.9370027 | 2.865838219  | 0.035449773 |
| NR_027036.1       | 33.6518119  | 187.2113162 | 2.475911552  | 0.035575158 |
| ENST00000417135.1 | 55.28511956 | 246.2868871 | 2.155376693  | 0.035737449 |
| ENST00000559539.1 | 54.08326913 | 242.9586859 | 2.167456746  | 0.035771522 |
| NR_109890.1       | 191.0942176 | 35.77816266 | -2.417132917 | 0.035948602 |
| ENST00000610187.1 | 44.46846573 | 216.3330765 | 2.282399731  | 0.03610562  |
| NR_136636.1       | 186.2868159 | 34.11406207 | -2.449087117 | 0.036114623 |
| NR_038982.1       | 60.09252126 | 258.7676415 | 2.106399864  | 0.036165745 |
| ENST00000412745.1 | 57.68882041 | 0           | #NAME?       | 0.036245722 |
| ENST00000428006.2 | 57.68882041 | 0           | #NAME?       | 0.036245722 |
| ENST00000431171.1 | 57.68882041 | 0           | #NAME?       | 0.036245722 |
| ENST00000439412.1 | 57.68882041 | 0           | #NAME?       | 0.036245722 |
| ENST00000449303.2 | 57.68882041 | 0           | #NAME?       | 0.036245722 |
| ENST00000450628.1 | 57.68882041 | 0           | #NAME?       | 0.036245722 |
| ENST00000457427.1 | 57.68882041 | 0           | #NAME?       | 0.036245722 |
| ENST00000505267.2 | 57.68882041 | 0           | #NAME?       | 0.036245722 |
| ENST00000509530.1 | 57.68882041 | 0           | #NAME?       | 0.036245722 |
| ENST00000518420.1 | 57.68882041 | 0           | #NAME?       | 0.036245722 |
| ENST00000523301.1 | 57.68882041 | 0           | #NAME?       | 0.036245722 |
| ENST00000548963.1 | 57.68882041 | 0           | #NAME?       | 0.036245722 |
| ENST00000564300.1 | 57.68882041 | 0           | #NAME?       | 0.036245722 |
| ENST00000600965.1 | 57.68882041 | 0           | #NAME?       | 0.036245722 |
| ENST00000607754.1 | 57.68882041 | 0           | #NAME?       | 0.036245722 |
| ENST00000607825.1 | 57.68882041 | 0           | #NAME?       | 0.036245722 |
| ENST00000609027.1 | 57.68882041 | 0           | #NAME?       | 0.036245722 |
| NR_026861.1       | 57.68882041 | 0           | #NAME?       | 0.036245722 |
| NR_027471.1       | 57.68882041 | 0           | #NAME?       | 0.036245722 |
| NR_046454.1       | 57.68882041 | 0           | #NAME?       | 0.036245722 |
| NR_104669.1       | 57.68882041 | 0           | #NAME?       | 0.036245722 |
| NR_120504.1       | 57.68882041 | 0           | #NAME?       | 0.036245722 |
| NR_103473.1       | 206.7182731 | 41.60251472 | -2.312923282 | 0.036279068 |
| NR_038404.1       | 176.6720125 | 30.78586089 | -2.520733696 | 0.036386177 |
| ENST00000437557.1 | 87.73508104 | 4.160251472 | -4.398411181 | 0.03647496  |
| ENST00000422740.1 | 2.40370085  | 80.70887855 | 5.069398125  | 0.036707369 |
| NR_027387.1       | 60.09252126 | 257.9355912 | 2.101753499  | 0.036708092 |
| NR_110385.1       | 16.82590595 | 136.4562483 | 3.019682366  | 0.036909716 |

|                   |             |             |              |             |
|-------------------|-------------|-------------|--------------|-------------|
| NR_015421.1       | 15.62405553 | 132.2959968 | 3.08192852   | 0.037347116 |
| NR_073047.1       | 118.9831921 | 426.841801  | 1.842943679  | 0.037380814 |
| NR_138091.1       | 102.1572861 | 7.488452649 | -3.769980651 | 0.03738175  |
| NR_104200.1       | 99.75358529 | 368.5982804 | 1.885608741  | 0.037504221 |
| NR_104654.1       | 31.24811105 | 178.058763  | 2.510512552  | 0.037854142 |
| ENST00000604793.1 | 0           | 61.57172178 | Inf          | 0.037927702 |
| ENST00000608883.1 | 0           | 61.57172178 | Inf          | 0.037927702 |
| NR_002786.1       | 0           | 61.57172178 | Inf          | 0.037927702 |
| NR_109973.1       | 46.87216658 | 220.493328  | 2.233931614  | 0.037951075 |
| ENST00000563116.1 | 66.10177338 | 0.832050294 | -6.31187443  | 0.038059173 |
| ENST00000609619.1 | 66.10177338 | 0.832050294 | -6.31187443  | 0.038059173 |
| NR_120408.1       | 66.10177338 | 0.832050294 | -6.31187443  | 0.038059173 |
| NR_037929.1       | 106.9646878 | 388.5674875 | 1.861030592  | 0.038113723 |
| NR_073472.1       | 102.1572861 | 373.5905822 | 1.870665982  | 0.038430354 |
| ENST00000599269.1 | 49.27586743 | 226.3176801 | 2.19939612   | 0.038446547 |
| NR_144380.1       | 199.5071706 | 39.93841413 | -2.320591647 | 0.038585814 |
| NR_134895.1       | 86.53323061 | 4.160251472 | -4.378511623 | 0.038736574 |
| NR_046260.1       | 44.46846573 | 213.0048754 | 2.260031918  | 0.038795357 |
| ENST00000565306.1 | 22.83515808 | 153.0972542 | 2.745119726  | 0.038856602 |
| NR_034009.1       | 108.1665383 | 390.231588  | 1.851076299  | 0.038924795 |
| NR_104134.1       | 205.5164227 | 42.43456501 | -2.27594189  | 0.039217141 |
| NR_144382.1       | 198.3053202 | 39.93841413 | -2.31187443  | 0.039675596 |
| ENST00000531906.1 | 10.81665383 | 114.8229406 | 3.408084739  | 0.039682026 |
| ENST00000581788.1 | 97.34988444 | 6.656402355 | -3.87036472  | 0.039869194 |
| NR_135635.1       | 97.34988444 | 6.656402355 | -3.87036472  | 0.039869194 |
| ENST00000565523.1 | 81.72582891 | 3.328201177 | -4.617977558 | 0.039958041 |
| ENST00000429882.1 | 56.48696998 | 0           | #NAME?       | 0.040096653 |
| ENST00000435539.1 | 56.48696998 | 0           | #NAME?       | 0.040096653 |
| ENST00000475196.1 | 56.48696998 | 0           | #NAME?       | 0.040096653 |
| ENST00000508878.1 | 56.48696998 | 0           | #NAME?       | 0.040096653 |
| ENST00000518787.2 | 56.48696998 | 0           | #NAME?       | 0.040096653 |
| ENST00000549303.1 | 56.48696998 | 0           | #NAME?       | 0.040096653 |
| ENST00000608587.1 | 56.48696998 | 0           | #NAME?       | 0.040096653 |
| NR_045262.1       | 56.48696998 | 0           | #NAME?       | 0.040096653 |
| NR_047026.1       | 56.48696998 | 0           | #NAME?       | 0.040096653 |
| NR_073393.1       | 56.48696998 | 0           | #NAME?       | 0.040096653 |
| NR_104182.1       | 56.48696998 | 0           | #NAME?       | 0.040096653 |
| NR_120484.1       | 56.48696998 | 0           | #NAME?       | 0.040096653 |
| NR_121636.1       | 56.48696998 | 0           | #NAME?       | 0.040096653 |
| NR_126420.1       | 56.48696998 | 0           | #NAME?       | 0.040096653 |
| NR_131786.1       | 56.48696998 | 0           | #NAME?       | 0.040096653 |

|                   |             |             |              |             |
|-------------------|-------------|-------------|--------------|-------------|
| NR_134632.1       | 56.48696998 | 0           | #NAME?       | 0.040096653 |
| NR_134301.1       | 60.09252126 | 252.9432895 | 2.073556607  | 0.040145084 |
| ENST00000457706.1 | 151.4331536 | 23.29740824 | -2.700439718 | 0.040477593 |
| ENST00000458003.1 | 126.1942946 | 14.9769053  | -3.074835233 | 0.04049218  |
| ENST00000434112.1 | 1.201850425 | 71.55632531 | 5.895750038  | 0.040546752 |
| NR_132418.1       | 12.01850425 | 118.1511418 | 3.297304308  | 0.040790405 |
| ENST00000425449.1 | 109.3683887 | 9.984603532 | -3.453346856 | 0.040894576 |
| ENST00000440403.1 | 64.89992296 | 0.832050294 | -6.285402219 | 0.040898097 |
| ENST00000457592.1 | 64.89992296 | 0.832050294 | -6.285402219 | 0.040898097 |
| ENST00000605233.1 | 64.89992296 | 0.832050294 | -6.285402219 | 0.040898097 |
| NR_002713.3       | 64.89992296 | 0.832050294 | -6.285402219 | 0.040898097 |
| NR_029404.1       | 64.89992296 | 0.832050294 | -6.285402219 | 0.040898097 |
| NR_121567.2       | 64.89992296 | 0.832050294 | -6.285402219 | 0.040898097 |
| NR_144867.1       | 64.89992296 | 0.832050294 | -6.285402219 | 0.040898097 |
| ENST00000430694.1 | 170.6627604 | 580.7711054 | 1.76682139   | 0.041120809 |
| ENST00000592440.1 | 3.605551275 | 84.86913002 | 4.556948125  | 0.041151423 |
| ENST00000557524.1 | 30.04626063 | 171.4023606 | 2.512129621  | 0.041272303 |
| NR_045632.1       | 30.04626063 | 171.4023606 | 2.512129621  | 0.041272303 |
| NR_051997.1       | 6.009252126 | 95.68578385 | 3.993047239  | 0.041719981 |
| NR_033654.1       | 43.26661531 | 206.348473  | 2.253756592  | 0.041828845 |
| NR_026887.1       | 126.1942946 | 436.8264045 | 1.791413378  | 0.041987277 |
| NR_145448.1       | 180.2775638 | 34.11406207 | -2.401781403 | 0.041994238 |
| NR_073051.1       | 143.0202006 | 488.4135228 | 1.771884213  | 0.042049782 |
| ENST00000503188.1 | 19.2296068  | 139.7844494 | 2.861802706  | 0.042067508 |
| NR_026834.1       | 96.14803401 | 6.656402355 | -3.852442812 | 0.042098075 |
| ENST00000371169.1 | 177.8738629 | 33.28201177 | -2.418039987 | 0.04215823  |
| NR_134471.1       | 45.67031616 | 212.1728251 | 2.215911207  | 0.042291039 |
| ENST00000520785.1 | 9.614803401 | 108.9985886 | 3.502908285  | 0.042377658 |
| NR_104613.1       | 16.82590595 | 132.2959968 | 2.975013317  | 0.042379774 |
| NR_104202.1       | 103.3591366 | 368.5982804 | 1.834383417  | 0.042390713 |
| ENST00000572811.1 | 150.2313031 | 510.0468304 | 1.763444262  | 0.042412788 |
| ENST00000593864.1 | 150.2313031 | 510.0468304 | 1.763444262  | 0.042412788 |
| NR_034011.1       | 0           | 59.90762119 | Inf          | 0.042682264 |
| NR_027174.1       | 92.54248274 | 336.9803692 | 1.86447684   | 0.042879078 |
| NR_027177.1       | 92.54248274 | 336.9803692 | 1.86447684   | 0.042879078 |
| NR_034164.1       | 108.1665383 | 9.984603532 | -3.437405312 | 0.042949528 |
| NR_110707.1       | 69.70732466 | 274.5765971 | 1.977826502  | 0.042953741 |
| NR_002822.3       | 13.22035468 | 120.6472927 | 3.189962755  | 0.042978341 |
| ENST00000435177.1 | 70.90917508 | 1.664100589 | -5.413157766 | 0.042985977 |
| NR_136691.1       | 70.90917508 | 1.664100589 | -5.413157766 | 0.042985977 |
| NR_073571.1       | 27.64255978 | 163.0818577 | 2.560633171  | 0.043160202 |

|                   |             |             |              |             |
|-------------------|-------------|-------------|--------------|-------------|
| ENST00000529938.1 | 6.009252126 | 94.85373355 | 3.980447203  | 0.043305344 |
| NR_130722.1       | 93.74433316 | 339.4765201 | 1.856508406  | 0.043355043 |
| NR_045023.1       | 56.48696998 | 238.7984345 | 2.079803358  | 0.043712087 |
| NR_075093.1       | 84.12952976 | 4.160251472 | -4.337869639 | 0.043747092 |
| NR_027470.1       | 9.614803401 | 108.1665383 | 3.491853096  | 0.043818571 |
| ENST00000557426.1 | 98.55173486 | 7.488452649 | -3.71814172  | 0.043825254 |
| ENST00000435872.1 | 63.69807253 | 0.832050294 | -6.258435171 | 0.044043689 |
| ENST00000453155.1 | 63.69807253 | 0.832050294 | -6.258435171 | 0.044043689 |
| ENST00000527712.1 | 63.69807253 | 0.832050294 | -6.258435171 | 0.044043689 |
| ENST00000590983.1 | 63.69807253 | 0.832050294 | -6.258435171 | 0.044043689 |
| NR_038243.2       | 63.69807253 | 0.832050294 | -6.258435171 | 0.044043689 |
| ENST00000609770.1 | 15.62405553 | 127.303695  | 3.026433408  | 0.044299236 |
| NR_144550.1       | 42.06476488 | 200.5241209 | 2.253091603  | 0.04437046  |
| ENST00000427339.1 | 55.28511956 | 0           | #NAME?       | 0.044415959 |
| ENST00000437354.1 | 55.28511956 | 0           | #NAME?       | 0.044415959 |
| ENST00000449453.1 | 55.28511956 | 0           | #NAME?       | 0.044415959 |
| ENST00000453457.3 | 55.28511956 | 0           | #NAME?       | 0.044415959 |
| ENST00000465946.1 | 55.28511956 | 0           | #NAME?       | 0.044415959 |
| ENST00000513393.1 | 55.28511956 | 0           | #NAME?       | 0.044415959 |
| ENST00000522844.1 | 55.28511956 | 0           | #NAME?       | 0.044415959 |
| ENST00000560647.1 | 55.28511956 | 0           | #NAME?       | 0.044415959 |
| ENST00000565095.1 | 55.28511956 | 0           | #NAME?       | 0.044415959 |
| ENST00000586398.1 | 55.28511956 | 0           | #NAME?       | 0.044415959 |
| ENST00000594069.1 | 55.28511956 | 0           | #NAME?       | 0.044415959 |
| ENST00000602939.1 | 55.28511956 | 0           | #NAME?       | 0.044415959 |
| ENST00000605571.1 | 55.28511956 | 0           | #NAME?       | 0.044415959 |
| ENST00000606967.1 | 55.28511956 | 0           | #NAME?       | 0.044415959 |
| NR_026646.1       | 55.28511956 | 0           | #NAME?       | 0.044415959 |
| NR_031617.1       | 55.28511956 | 0           | #NAME?       | 0.044415959 |
| NR_033943.1       | 55.28511956 | 0           | #NAME?       | 0.044415959 |
| NR_037969.1       | 55.28511956 | 0           | #NAME?       | 0.044415959 |
| NR_108085.1       | 55.28511956 | 0           | #NAME?       | 0.044415959 |
| NR_131234.1       | 55.28511956 | 0           | #NAME?       | 0.044415959 |
| NR_131235.1       | 55.28511956 | 0           | #NAME?       | 0.044415959 |
| NR_131947.1       | 55.28511956 | 0           | #NAME?       | 0.044415959 |
| NR_132738.1       | 55.28511956 | 0           | #NAME?       | 0.044415959 |
| NR_134487.1       | 55.28511956 | 0           | #NAME?       | 0.044415959 |
| NR_135279.1       | 55.28511956 | 0           | #NAME?       | 0.044415959 |
| ENST00000418430.1 | 34.85366233 | 181.3869642 | 2.379688613  | 0.044546227 |
| ENST00000536986.1 | 115.3776408 | 12.48075442 | -3.208586622 | 0.044944403 |
| NR_103552.1       | 138.2127989 | 19.96920706 | -2.791042267 | 0.045011811 |

|                   |             |             |              |             |
|-------------------|-------------|-------------|--------------|-------------|
| ENST00000506086.2 | 30.04626063 | 168.0741595 | 2.483840576  | 0.045031407 |
| ENST00000454636.1 | 24.0370085  | 151.4331536 | 2.655351829  | 0.045093476 |
| NR_135061.1       | 24.0370085  | 151.4331536 | 2.655351829  | 0.045093476 |
| ENST00000573394.1 | 8.412952976 | 103.1742365 | 3.616326672  | 0.045140461 |
| ENST00000600650.1 | 8.412952976 | 103.1742365 | 3.616326672  | 0.045140461 |
| ENST00000560851.1 | 100.9554357 | 8.320502943 | -3.600904045 | 0.04524604  |
| NR_104368.2       | 102.1572861 | 359.4457272 | 1.814981849  | 0.045320938 |
| NR_104369.2       | 102.1572861 | 359.4457272 | 1.814981849  | 0.045320938 |
| ENST00000415394.1 | 0           | 59.0755709  | Inf          | 0.045334684 |
| NR_135553.1       | 69.70732466 | 271.248396  | 1.960232442  | 0.045337536 |
| ENST00000605896.1 | 168.2590595 | 30.78586089 | -2.450344368 | 0.045396565 |
| ENST00000437330.1 | 40.86291446 | 196.3638695 | 2.264665491  | 0.045404307 |
| ENST00000431955.1 | 79.32212806 | 3.328201177 | -4.574908836 | 0.04565338  |
| ENST00000538430.1 | 79.32212806 | 3.328201177 | -4.574908836 | 0.04565338  |
| ENST00000609191.1 | 79.32212806 | 3.328201177 | -4.574908836 | 0.04565338  |
| NR_038164.1       | 118.9831921 | 406.8725939 | 1.773819318  | 0.045666826 |
| NR_110105.1       | 120.1850425 | 14.144855   | -3.086908065 | 0.045736025 |
| NR_033781.1       | 284.8385508 | 75.71657678 | -1.911463325 | 0.045891122 |
| NR_004393.1       | 841.2952976 | 250.4471386 | -1.748106152 | 0.046032926 |
| ENST00000512599.1 | 7.211102551 | 98.18193473 | 3.767165832  | 0.046155905 |
| ENST00000602592.1 | 7.211102551 | 98.18193473 | 3.767165832  | 0.046155905 |
| ENST00000444649.1 | 12.01850425 | 114.8229406 | 3.256081645  | 0.046223034 |
| NR_038833.1       | 2.40370085  | 76.54862708 | 4.993047239  | 0.046387761 |
| NR_040247.1       | 18.02775638 | 133.1280471 | 2.884522783  | 0.046410987 |
| NR_125336.1       | 82.92767934 | 4.160251472 | -4.317111079 | 0.046535715 |
| NR_135630.1       | 223.5441791 | 52.41916854 | -2.092393604 | 0.046564871 |
| NR_038937.1       | 6.009252126 | 93.18963297 | 3.95491211   | 0.046644152 |
| NR_027173.1       | 94.94618359 | 336.9803692 | 1.827482633  | 0.04666903  |
| NR_027178.1       | 94.94618359 | 336.9803692 | 1.827482633  | 0.04666903  |
| NR_046563.1       | 74.51472636 | 2.496150883 | -4.899748526 | 0.046773058 |
| NR_073097.1       | 74.51472636 | 2.496150883 | -4.899748526 | 0.046773058 |
| NR_131160.1       | 74.51472636 | 2.496150883 | -4.899748526 | 0.046773058 |
| ENST00000517731.1 | 93.74433316 | 6.656402355 | -3.815916936 | 0.046904705 |
| NR_036475.2       | 42.06476488 | 198.0279701 | 2.23502003   | 0.046908265 |
| NR_030324.1       | 1.201850425 | 69.06017443 | 5.844524715  | 0.047010522 |
| NR_046117.1       | 164.6535082 | 29.9538106  | -2.458621798 | 0.047059063 |
| ENST00000425246.1 | 105.7628374 | 9.984603532 | -3.404983835 | 0.047357204 |
| ENST00000511693.1 | 62.49622211 | 0.832050294 | -6.230954435 | 0.047608057 |
| NR_038331.1       | 62.49622211 | 0.832050294 | -6.230954435 | 0.047608057 |
| NR_104174.1       | 62.49622211 | 0.832050294 | -6.230954435 | 0.047608057 |
| NR_126023.1       | 62.49622211 | 0.832050294 | -6.230954435 | 0.047608057 |

|                   |             |             |              |             |
|-------------------|-------------|-------------|--------------|-------------|
| NR_110646.1       | 173.0664612 | 33.28201177 | -2.378511623 | 0.047618871 |
| NR_144389.1       | 282.4348499 | 75.71657678 | -1.899237023 | 0.04762242  |
| ENST00000442055.1 | 12.01850425 | 113.9908903 | 3.245589271  | 0.047686903 |
| ENST00000399447.3 | 14.4222051  | 121.479343  | 3.074347341  | 0.047719097 |
| ENST00000523002.1 | 69.70732466 | 267.9201948 | 1.942421166  | 0.047860727 |
| NR_038375.1       | 168.2590595 | 31.61791118 | -2.41187022  | 0.048110504 |
| NR_027428.1       | 123.7905938 | 15.80895559 | -2.96908773  | 0.048213208 |
| NR_027429.1       | 123.7905938 | 15.80895559 | -2.96908773  | 0.048213208 |
| NR_052024.1       | 123.7905938 | 15.80895559 | -2.96908773  | 0.048213208 |
| ENST00000435884.1 | 15.62405553 | 124.8075442 | 2.997864256  | 0.048240169 |
| ENST00000562769.1 | 78.12027764 | 3.328201177 | -4.55288253  | 0.048789173 |
| NR_038167.1       | 185.0849655 | 38.27431354 | -2.273739301 | 0.048800254 |
| NR_144486.1       | 18.02775638 | 131.4639465 | 2.866375436  | 0.048969191 |
| NR_144487.1       | 18.02775638 | 131.4639465 | 2.866375436  | 0.048969191 |
| NR_027635.1       | 75.71657678 | 282.0650498 | 1.897346823  | 0.048969898 |
| NR_136645.1       | 75.71657678 | 282.0650498 | 1.897346823  | 0.048969898 |
| NR_024004.1       | 158.6442561 | 28.28971001 | -2.487445995 | 0.04902902  |
| NR_038972.1       | 19.2296068  | 134.7921477 | 2.809335286  | 0.049210598 |
| ENST00000412218.1 | 54.08326913 | 0           | #NAME?       | 0.049214158 |
| ENST00000412835.1 | 54.08326913 | 0           | #NAME?       | 0.049214158 |
| ENST00000416553.1 | 54.08326913 | 0           | #NAME?       | 0.049214158 |
| ENST00000434510.1 | 54.08326913 | 0           | #NAME?       | 0.049214158 |
| ENST00000443459.1 | 54.08326913 | 0           | #NAME?       | 0.049214158 |
| ENST00000448543.1 | 54.08326913 | 0           | #NAME?       | 0.049214158 |
| ENST00000508189.1 | 54.08326913 | 0           | #NAME?       | 0.049214158 |
| ENST00000512609.1 | 54.08326913 | 0           | #NAME?       | 0.049214158 |
| ENST00000523083.1 | 54.08326913 | 0           | #NAME?       | 0.049214158 |
| ENST00000551089.1 | 54.08326913 | 0           | #NAME?       | 0.049214158 |
| ENST00000556738.1 | 54.08326913 | 0           | #NAME?       | 0.049214158 |
| ENST00000560503.1 | 54.08326913 | 0           | #NAME?       | 0.049214158 |
| ENST00000562180.1 | 54.08326913 | 0           | #NAME?       | 0.049214158 |
| ENST00000564402.1 | 54.08326913 | 0           | #NAME?       | 0.049214158 |
| ENST00000585297.1 | 54.08326913 | 0           | #NAME?       | 0.049214158 |
| ENST00000597303.1 | 54.08326913 | 0           | #NAME?       | 0.049214158 |
| ENST00000600839.1 | 54.08326913 | 0           | #NAME?       | 0.049214158 |
| ENST00000602403.1 | 54.08326913 | 0           | #NAME?       | 0.049214158 |
| ENST00000609612.1 | 54.08326913 | 0           | #NAME?       | 0.049214158 |
| NR_046748.1       | 54.08326913 | 0           | #NAME?       | 0.049214158 |
| NR_073407.1       | 54.08326913 | 0           | #NAME?       | 0.049214158 |
| NR_103805.1       | 54.08326913 | 0           | #NAME?       | 0.049214158 |
| NR_108052.1       | 54.08326913 | 0           | #NAME?       | 0.049214158 |



|                   |             |             |              |             |
|-------------------|-------------|-------------|--------------|-------------|
| NR_110433.1       | 54.08326913 | 0           | #NAME?       | 0.049214158 |
| NR_125863.1       | 54.08326913 | 0           | #NAME?       | 0.049214158 |
| NR_125979.1       | 54.08326913 | 0           | #NAME?       | 0.049214158 |
| NR_131948.1       | 54.08326913 | 0           | #NAME?       | 0.049214158 |
| NR_135253.1       | 54.08326913 | 0           | #NAME?       | 0.049214158 |
| NR_135278.1       | 54.08326913 | 0           | #NAME?       | 0.049214158 |
| ENST00000412098.2 | 1.201850425 | 68.22812414 | 5.827037288  | 0.049264553 |
| NR_120360.1       | 180.2775638 | 36.61021295 | -2.299901789 | 0.049398286 |
| NR_135205.1       | 241.5719355 | 60.73967149 | -1.991741849 | 0.04948135  |
| ENST00000583343.1 | 92.54248274 | 6.656402355 | -3.797301257 | 0.049492153 |
| NR_073395.1       | 70.90917508 | 268.7522451 | 1.922232589  | 0.049653127 |
| NR_046696.1       | 10.81665383 | 108.9985886 | 3.332983283  | 0.04974074  |
| NR_138609.1       | 55.28511956 | 228.8138309 | 2.049211136  | 0.049806373 |
| ENST00000565707.1 | 88.93693146 | 5.82435206  | -3.93261316  | 0.049867179 |
| NR_125819.1       | 186.2868159 | 39.10636383 | -2.25205027  | 0.049889206 |
