# Supplementary material
Source: publisher figshare collection journal article supplement (https://diabetesjournals.figshare.com/articles/dataset/_/23552883)
Supplement: Supplementary file 2 [file 1]

**Supplementary Table S6 Primers used for RT-qPCR**

| <b>Gene</b>         | <b>Forward (5'-3')</b>    | <b>Reverse (5'-3')</b>    |
|---------------------|---------------------------|---------------------------|
| <b>LOC100132249</b> | AACTTCTCTCTTGTGCACTGACATC | GCTGTCCAAGTCTAGTCAAGGGAG  |
| <b>LOC100506688</b> | AGCGATGTTGGTATCTTCATAGG   | AACGGAAATACATCCCATGATC    |
| <b>LOC100507657</b> | CAGGCACCATGATTATTTTCATCTC | CTTAGCTTCAACGTCACTTCCC    |
| <b>LINC00982</b>    | TGCGAGCTTTGCTTTCTACTAA    | GGTCACTCTACAGAACTGGTCATTT |
| <b>h-SNAI1</b>      | AGTAATGGCTGTCACTTGTCGG    | TAGTTCTGGGAGACACATCGGT    |
| <b>GAPDH</b>        | GAACGGGAAGCTCACTGG        | GCCTGCTTCACCACCTTCT       |
| <b>m-SNAI1</b>      | TTGTAACAAGGAGTACCTCAGCC   | CTTTCCACAGGTCGTGCAGA      |
