# Supplementary material
Source: publisher figshare collection journal article supplement (https://diabetesjournals.figshare.com/articles/dataset/_/23552883)
Supplement: Supplementary file 4 [file 1]

**Supplementary Table S2 Fibrovascular membrane and epiretinal membrane samples were harvested from 4 PDR patients and 4 sex-age matched ERM patients**

|             | <b>Sex</b>    | <b>Age (years)</b><br><b>(P=0.9016)</b> | <b>Sample</b> |
|-------------|---------------|-----------------------------------------|---------------|
| <b>PDR1</b> | <b>Male</b>   | <b>60</b>                               | <b>FVM</b>    |
| <b>PDR2</b> | <b>Male</b>   | <b>69</b>                               | <b>FVM</b>    |
| <b>PDR3</b> | <b>Female</b> | <b>52</b>                               | <b>FVM</b>    |
| <b>PDR4</b> | <b>Female</b> | <b>57</b>                               | <b>FVM</b>    |
| <b>ERM1</b> | <b>Male</b>   | <b>74</b>                               | <b>ERM</b>    |
| <b>ERM2</b> | <b>Male</b>   | <b>45</b>                               | <b>ERM</b>    |
| <b>ERM3</b> | <b>Female</b> | <b>53</b>                               | <b>ERM</b>    |
| <b>ERM4</b> | <b>Female</b> | <b>70</b>                               | <b>ERM</b>    |

**Sex was not considered a factor in the statistical analysis of the data.**
