# Supplementary material
Source: publisher figshare collection journal article supplement (https://diabetesjournals.figshare.com/articles/dataset/_/23552883)
Supplement: Supplementary file 5 [file 1]

**Supplementary Table S3 Differentially expressed lncRNAs in the exosomal sequencing of the vitreous humor from PDR patients and MH patients**

| gene              | control_vitreouy | PDR_vitreouy | log2(Fold_change) | p-value     |
|-------------------|------------------|--------------|-------------------|-------------|
| PLEKHG4B          | 4.468297218      | 804.7808425  | 7.492727          | 1.56E-05    |
| MIR9-3HG          | 0                | 424.3227134  | Inf               | 0.000186198 |
| ENSG00000224441.1 | 450.1809448      | 0            | #NAME?            | 7.53E-05    |
| SLC9A7            | 2.234148609      | 579.1915518  | 8.018171596       | 8.11E-05    |
| ENSG00000206195.6 | 440.127276       | 0            | #NAME?            | 9.18E-05    |
| RPS28P6           | 495.9809912      | 0.895195598  | -9.113866172      | 9.37E-05    |
| LOC100132249      | 0                | 396.5716499  | Inf               | 0.000317277 |
| THOC7             | 413.3174927      | 0            | #NAME?            | 0.000156808 |
| LOC100507657      | 0                | 277.5106353  | Inf               | 0.005060343 |
| GPR26             | 2.234148609      | 509.3662952  | 7.832834536       | 0.00023547  |
| SFXN5             | 3.351222914      | 533.5365763  | 7.314755714       | 0.000274228 |
| ENSG00000229272.1 | 746.2056355      | 14.32312957  | -5.703154598      | 0.000313389 |
| LINC01529         | 0                | 249.7595718  | Inf               | 0.010319171 |
| ARAP3             | 8.936594437      | 637.3792657  | 6.156283125       | 0.000369548 |
| ENSG00000260072.1 | 0                | 243.4932026  | Inf               | 0.012276799 |
| PEX6              | 1.117074305      | 415.3707574  | 8.538530689       | 0.00059805  |
| ENSG00000258749.1 | 392.0930809      | 0.895195598  | -8.774777526      | 0.000630777 |
| LCOR              | 4.468297218      | 503.9951216  | 6.817540806       | 0.000639792 |
| RPL8P4            | 593.1664558      | 9.847151577  | -5.912586738      | 0.000692922 |
| NRXN2             | 4.468297218      | 496.8335568  | 6.796893655       | 0.000710769 |
| LINC00319         | 0                | 241.7028114  | Inf               | 0.012913216 |
| TTBK1             | 5.585371523      | 515.6326644  | 6.528546601       | 0.000757928 |
| QRICH2            | 6.702445828      | 529.0605983  | 6.302601513       | 0.000843753 |
| ATP9B             | 1.117074305      | 392.9908675  | 8.458626824       | 0.000891396 |
| FAM227A           | 5.585371523      | 497.7287524  | 6.477562672       | 0.000975925 |
| EXTL1             | 0                | 342.859914   | Inf               | 0.000987997 |
| DNMBP             | 5.585371523      | 493.2527744  | 6.464530108       | 0.001040189 |
| SNAI3-AS1         | 0                | 235.4364422  | Inf               | 0.015436968 |
| TLX1NB            | 0                | 235.4364422  | Inf               | 0.015436968 |
| ENSG00000244550.1 | 319.4832511      | 0            | #NAME?            | 0.001309853 |
| F12               | 1.117074305      | 369.7157819  | 8.370547665       | 0.001367363 |
| ITPKB             | 2.234148609      | 401.0476279  | 7.487904616       | 0.001404078 |
| STAG3             | 3.351222914      | 427.0083002  | 6.993432649       | 0.001428249 |
| CSF1R             | 5.585371523      | 470.8728845  | 6.397540588       | 0.001435385 |

|                   |             |             |              |             |
|-------------------|-------------|-------------|--------------|-------------|
| CCDC114           | 0           | 326.7463932 | Inf          | 0.001465379 |
| PLA2G4E           | 3.351222914 | 423.4275178 | 6.981283567  | 0.001512779 |
| JPH2              | 2.234148609 | 395.6764543 | 7.468452253  | 0.001536937 |
| MROH5             | 2.234148609 | 395.6764543 | 7.468452253  | 0.001536937 |
| ENSG00000257740.1 | 455.7663163 | 5.371173587 | -6.406913147 | 0.001556065 |
| INPP4A            | 5.585371523 | 460.1305373 | 6.364246148  | 0.001678227 |
| NFAM1             | 2.234148609 | 386.7244983 | 7.435437196  | 0.001788759 |
| BRPF3             | 8.936594437 | 506.6807084 | 5.825207937  | 0.001822869 |
| TAS2R38           | 668.0104342 | 23.27508554 | -4.843012262 | 0.001936596 |
| TROAP             | 0           | 314.2136549 | Inf          | 0.002008746 |
| ENSG00000261079.1 | 0           | 230.9604643 | Inf          | 0.017536938 |
| SGSM2             | 5.585371523 | 443.121821  | 6.309906314  | 0.002153782 |
| KAT6B             | 1.117074305 | 346.4406964 | 8.27673945   | 0.002193672 |
| MSH5              | 3.351222914 | 398.3620411 | 6.893248719  | 0.002260719 |
| MIR489            | 299.3759136 | 0           | #NAME?       | 0.002266361 |
| MIR503            | 609.9225703 | 19.69430315 | -4.952775828 | 0.002338851 |
| VWA5B2            | 7.819520132 | 471.7680801 | 5.914853924  | 0.002343919 |
| ARAP1             | 15.63904026 | 568.4492047 | 5.183807554  | 0.002368721 |
| TNKS              | 5.585371523 | 435.9602562 | 6.286399561  | 0.002393901 |
| SNORD98           | 297.141765  | 0           | #NAME?       | 0.002408527 |
| DLGAP3            | 2.234148609 | 365.2398039 | 7.352975036  | 0.002603724 |
| MFSD7             | 0           | 303.4713077 | Inf          | 0.002662817 |
| BCL2              | 0           | 302.5761121 | Inf          | 0.00272635  |
| ITGAL             | 10.05366874 | 487.8816008 | 5.600737112  | 0.002817586 |
| EMX2OS            | 2.234148609 | 358.9734348 | 7.32800812   | 0.002923958 |
| MYOM1             | 2.234148609 | 358.0782392 | 7.324405884  | 0.002973913 |
| KSR1              | 4.468297218 | 400.1524323 | 6.484680715  | 0.003082623 |
| ENSG00000204929.7 | 0           | 229.1700731 | Inf          | 0.018448607 |
| KIF7              | 2.234148609 | 354.4974568 | 7.309906314  | 0.003185064 |
| TRPM5             | 6.702445828 | 433.2746694 | 6.014450431  | 0.003202789 |
| JDP2              | 0           | 296.3097429 | Inf          | 0.003211138 |
| RAB36             | 4.468297218 | 394.7812587 | 6.46518454   | 0.003347681 |
| NFIX              | 5.585371523 | 412.6851706 | 6.20724454   | 0.003381805 |
| PSD2              | 2.234148609 | 350.9166744 | 7.295259538  | 0.003415524 |
| CAND2             | 5.585371523 | 411.789975  | 6.20411165   | 0.003426998 |
| RASGRP4           | 4.468297218 | 392.9908675 | 6.458626824  | 0.003441193 |
| ATXN1L            | 4.468297218 | 392.0956719 | 6.455336754  | 0.003488973 |
| TRNAE21           | 533.9615176 | 16.11352076 | -5.050392113 | 0.00351904  |
| ENSG00000261829.1 | 281.5027248 | 0           | #NAME?       | 0.003596516 |
| ENSG00000272808.1 | 0           | 223.7988995 | Inf          | 0.021519496 |
| SLC6A7            | 2.234148609 | 347.335892  | 7.280462536  | 0.003666936 |

|                   |             |             |              |             |
|-------------------|-------------|-------------|--------------|-------------|
| FAM78A            | 0           | 290.0433737 | Inf          | 0.003763208 |
| PRX               | 3.351222914 | 367.0301951 | 6.775067293  | 0.003774653 |
| TFR2              | 2.234148609 | 345.5455008 | 7.273006731  | 0.003801034 |
| KLHL36            | 4.468297218 | 384.9341071 | 6.428742544  | 0.003897646 |
| CORO2B            | 1.117074305 | 320.480024  | 8.164365471  | 0.003913529 |
| LINC01605         | 0           | 218.4277259 | Inf          | 0.025090472 |
| C17orf51          | 1.117074305 | 318.6896328 | 8.156283125  | 0.004076148 |
| BRIX1P1           | 274.8002789 | 0           | #NAME?       | 0.004235457 |
| NPR1              | 6.702445828 | 412.6851706 | 5.944210134  | 0.00430544  |
| CNNM1             | 2.234148609 | 339.2791316 | 7.246603732  | 0.004318248 |
| IQCA1L            | 2.234148609 | 339.2791316 | 7.246603732  | 0.004318248 |
| ENSG00000269086.2 | 0           | 217.5325303 | Inf          | 0.025725912 |
| TAB3              | 3.351222914 | 358.9734348 | 6.74304562   | 0.004340717 |
| CCNF              | 5.585371523 | 395.6764543 | 6.146524159  | 0.004349273 |
| TAF8              | 2.234148609 | 335.6983492 | 7.231296479  | 0.004649965 |
| LINC00865         | 0           | 217.5325303 | Inf          | 0.025725912 |
| RN7SL451P         | 270.3319817 | 0           | #NAME?       | 0.004740117 |
| ITSN2             | 10.05366874 | 445.8074077 | 5.470626625  | 0.004862763 |
| GRIK5             | 3.351222914 | 350.9166744 | 6.710297037  | 0.005025239 |
| LINC01658         | 0           | 217.5325303 | Inf          | 0.025725912 |
| RBMX2P5           | 742.8544126 | 45.65497549 | -4.024235494 | 0.00509615  |
| SERINC5           | 15.63904026 | 499.5191436 | 4.997316084  | 0.005115738 |
| HPCAL4            | 1.117074305 | 308.8424813 | 8.111002246  | 0.005133621 |
| NICN1             | 1.117074305 | 308.8424813 | 8.111002246  | 0.005133621 |
| RPSAP2            | 482.5760996 | 14.32312957 | -5.074337808 | 0.005177335 |
| ENSG00000228763.1 | 360.8150004 | 4.475977989 | -6.332912566 | 0.005341138 |
| ENSG00000269940.1 | 294.9076164 | 0.895195598 | -8.363844425 | 0.00551636  |
| JPH3              | 1.117074305 | 305.2616989 | 8.094177623  | 0.005591786 |
| SLC7A14           | 5.585371523 | 378.6677379 | 6.083135452  | 0.005604777 |
| NOP14-AS1         | 0           | 209.4757699 | Inf          | 0.03176365  |
| ENSG00000267122.1 | 0           | 272.1394618 | Inf          | 0.005746474 |
| bA395L14.12       | 455.7663163 | 12.53273837 | -5.184520726 | 0.005770475 |
| LOC286359         | 0           | 206.7901831 | Inf          | 0.033899996 |
| PLPPR2            | 1.117074305 | 303.4713077 | 8.085691157  | 0.005836326 |
| SLC25A6           | 311.663731  | 1.790391196 | -7.443571618 | 0.005870027 |
| FAM212B           | 4.468297218 | 358.9734348 | 6.32800812   | 0.00590658  |
| LRRC74B           | 2.234148609 | 324.0608064 | 7.180395581  | 0.005935215 |
| SV2A              | 2.234148609 | 324.0608064 | 7.180395581  | 0.005935215 |
| KIR3DL3           | 0           | 269.453875  | Inf          | 0.00613791  |
| GNAS-AS1          | 735.0348924 | 48.34056229 | -3.926506578 | 0.006138625 |
| RN7SL795P         | 546.249335  | 23.27508554 | -4.552701243 | 0.006148881 |

|                   |             |             |              |             |
|-------------------|-------------|-------------|--------------|-------------|
| VILL              | 7.819520132 | 401.9428234 | 5.683766407  | 0.006162392 |
| LINC01104         | 0           | 205.8949875 | Inf          | 0.034633723 |
| 8-Mar             | 3.351222914 | 339.2791316 | 6.661641231  | 0.006268148 |
| POU5F1P4          | 586.4640099 | 28.64625913 | -4.355623919 | 0.006274454 |
| SULT4A1           | 0           | 268.5586794 | Inf          | 0.006277367 |
| ITIH4             | 2.234148609 | 321.3752196 | 7.168389728  | 0.00628122  |
| SLC22A6           | 3.351222914 | 337.4887404 | 6.654007907  | 0.006490102 |
| ENSG00000245261.1 | 509.3858829 | 19.69430315 | -4.692908702 | 0.006636527 |
| ITGA2B            | 7.819520132 | 396.5716499 | 5.664357661  | 0.006638859 |
| IQCF1             | 613.2737932 | 33.12223712 | -4.210659279 | 0.006660641 |
| CLK3P2            | 928.2887471 | 76.98682142 | -3.591890218 | 0.006769794 |
| GTF2IRD1P1        | 0           | 264.0827014 | Inf          | 0.007046972 |
| CYP11B1           | 1.117074305 | 295.4145473 | 8.046871908  | 0.007064717 |
| KREMEN1           | 5.585371523 | 363.4494127 | 6.023957516  | 0.007078075 |
| UNC5CL            | 1.117074305 | 294.5193517 | 8.042493468  | 0.007213811 |
| C22orf34          | 5.585371523 | 361.6590215 | 6.016833082  | 0.007280645 |
| ATOH8             | 2.234148609 | 314.2136549 | 7.135876914  | 0.00731645  |
| TNFRSF11A         | 1578.425992 | 158.4496208 | -3.316390506 | 0.007321426 |
| LLGL1             | 6.702445828 | 375.0869555 | 5.806393627  | 0.007392067 |
| EML1              | 2.234148609 | 313.3184593 | 7.131760806  | 0.007460124 |
| ZFP64             | 8.936594437 | 401.0476279 | 5.487904616  | 0.007470588 |
| RPS20P35          | 341.8247372 | 4.475977989 | -6.254910054 | 0.007495182 |
| FNDC1             | 7.819520132 | 387.6196939 | 5.631417987  | 0.007517903 |
| KDR               | 1.117074305 | 292.7289605 | 8.03369652   | 0.007519142 |
| ZNF541            | 3.351222914 | 329.43198   | 6.619149149  | 0.00760421  |
| GRM5              | 2.234148609 | 312.4232637 | 7.12763292   | 0.007607176 |
| TRO               | 2.234148609 | 312.4232637 | 7.12763292   | 0.007607176 |
| ZNF500            | 2.234148609 | 312.4232637 | 7.12763292   | 0.007607176 |
| CNTN2             | 22.34148609 | 520.1086424 | 4.541015953  | 0.007633779 |
| DDN               | 1.117074305 | 291.8337649 | 8.029277848  | 0.007675268 |
| SLC30A3           | 11.17074305 | 422.5323222 | 5.241264648  | 0.007690279 |
| CNIH3             | 0           | 260.501919  | Inf          | 0.007739678 |
| TOP3B             | 4.468297218 | 342.859914  | 6.261750276  | 0.007841762 |
| GFI1B             | 0           | 259.6067234 | Inf          | 0.007924343 |
| CDC42BPA          | 6.702445828 | 369.7157819 | 5.785585165  | 0.008000133 |
| NLRX1             | 4.468297218 | 341.0695228 | 6.254196882  | 0.008102335 |
| MARCKSL1P1        | 411.0833441 | 10.74234717 | -5.258049761 | 0.008108129 |
| HPSE2             | 0           | 258.7115278 | Inf          | 0.008113912 |
| LINC02011         | 0           | 204.1045963 | Inf          | 0.036141675 |
| PRKAR1B           | 2.234148609 | 308.8424813 | 7.111002246  | 0.008229888 |
| TMEM184A          | 5.585371523 | 353.6022612 | 5.984330442  | 0.008297969 |

|                   |             |             |              |             |
|-------------------|-------------|-------------|--------------|-------------|
| ZNF25             | 1.117074305 | 288.2529825 | 8.011466572  | 0.008320482 |
| EHD3              | 6.702445828 | 367.0301951 | 5.775067293  | 0.008325721 |
| LOC284395         | 0           | 197.8382271 | Inf          | 0.042010468 |
| C21orf2           | 960.683902  | 88.62436419 | -3.438286536 | 0.00850192  |
| ALDH18A1          | 6.702445828 | 365.2398039 | 5.768012535  | 0.008551414 |
| PFKFB4            | 6.702445828 | 365.2398039 | 5.768012535  | 0.008551414 |
| ACVR1B            | 4.468297218 | 337.4887404 | 6.238970407  | 0.008654642 |
| C9orf139          | 1433.206333 | 151.288056  | -3.243876325 | 0.008726298 |
| LOC677762         | 274.8002789 | 0.895195598 | -8.261964811 | 0.008734141 |
| PCDH7             | 3.351222914 | 322.2704152 | 6.58744029   | 0.008767481 |
| CHRN2             | 2.234148609 | 305.2616989 | 7.094177623  | 0.008909189 |
| ENSG00000262681.2 | 0           | 195.1526403 | Inf          | 0.044867273 |
| NTN1              | 2.234148609 | 304.3665033 | 7.08994063   | 0.009088009 |
| NOL12             | 0           | 254.2355498 | Inf          | 0.00914134  |
| ENSG00000212766.5 | 0           | 193.3622491 | Inf          | 0.046880548 |
| ENSG00000227014.1 | 245.756347  | 0           | #NAME?       | 0.009373111 |
| LIMS2             | 2.234148609 | 302.5761121 | 7.08142913   | 0.009456511 |
| ENSG00000253944.1 | 475.8736538 | 19.69430315 | -4.594728308 | 0.009557426 |
| DOCK10            | 4.468297218 | 331.2223712 | 6.211931155  | 0.009727905 |
| LOC102723566      | 0           | 193.3622491 | Inf          | 0.046880548 |
| NCAPG2            | 7.819520132 | 368.8205863 | 5.559695299  | 0.009799245 |
| TIPARP-AS1        | 0           | 192.4670535 | Inf          | 0.047917704 |
| PAFAH1B1P2        | 458.0004649 | 17.90391196 | -4.677002311 | 0.009975823 |
| ENSG00000261633.1 | 726.098298  | 58.18771386 | -3.641378401 | 0.009985394 |
| CD6               | 6.702445828 | 354.4974568 | 5.724943813  | 0.010086323 |
| SLFN5             | 5.585371523 | 341.9647184 | 5.936050427  | 0.010118086 |
| GOLGA7B           | 1.117074305 | 278.4058309 | 7.961320464  | 0.01026845  |
| H1FX-AS1          | 0           | 191.5718579 | Inf          | 0.048974122 |
| CYFIP1            | 14.52196596 | 429.693887  | 4.887000571  | 0.010342307 |
| C3P1              | 4.468297218 | 327.6415888 | 6.196249532  | 0.010406525 |
| BCL11A            | 3.351222914 | 313.3184593 | 6.546798305  | 0.010490655 |
| SLC8A1            | 2.234148609 | 297.2049385 | 7.055589125  | 0.0106484   |
| RPS12             | 626.6786849 | 43.8645843  | -3.836597422 | 0.010709429 |
| SULF2             | 15.63904026 | 435.9602562 | 4.800972734  | 0.010727546 |
| LOC100130607      | 361.9320747 | 8.056760381 | -5.489375307 | 0.01074908  |
| STEAP2            | 741.7373383 | 62.66369185 | -3.56520672  | 0.0107664   |
| FXN               | 0           | 247.9691806 | Inf          | 0.010838574 |
| NXF3              | 1.117074305 | 275.7202441 | 7.947336235  | 0.010864899 |
| NAT10             | 11.17074305 | 395.6764543 | 5.146524159  | 0.010868192 |
| ORMDL3            | 5.585371523 | 337.4887404 | 5.917042312  | 0.010945932 |
| MST1R             | 7.819520132 | 359.8686303 | 5.524246463  | 0.011158296 |

|                   |             |             |              |             |
|-------------------|-------------|-------------|--------------|-------------|
| ROBO2             | 11.17074305 | 392.9908675 | 5.136698729  | 0.011248703 |
| GNAT1             | 2.234148609 | 294.5193517 | 7.042493468  | 0.011291683 |
| RASGRF2           | 5.585371523 | 335.6983492 | 5.909368385  | 0.011299056 |
| USH1G             | 1.117074305 | 273.0346574 | 7.933215126  | 0.011502424 |
| COL9A2            | 7.819520132 | 357.1830436 | 5.513439708  | 0.011613262 |
| HIC2              | 4.468297218 | 321.3752196 | 6.168389728  | 0.011716891 |
| PDE1B             | 3.351222914 | 307.9472857 | 6.521851948  | 0.011719517 |
| TP53INP2          | 2.234148609 | 292.7289605 | 7.03369652   | 0.011737179 |
| CYP2C115P         | 237.9368269 | 0           | #NAME?       | 0.011812568 |
| ZMYM4             | 840.0398771 | 81.46279941 | -3.366244517 | 0.011850225 |
| SUMO3             | 779.7178646 | 71.61564783 | -3.444605437 | 0.011853684 |
| ARHGAP33          | 3.351222914 | 307.0520901 | 6.517651959  | 0.011939859 |
| CDH16             | 3.351222914 | 306.1568945 | 6.513439708  | 0.012164709 |
| RARA              | 3.351222914 | 306.1568945 | 6.513439708  | 0.012164709 |
| IFNLR1            | 8.936594437 | 365.2398039 | 5.352975036  | 0.012171913 |
| ENGASE            | 15.63904026 | 425.217909  | 4.764978475  | 0.012180519 |
| OR52D1            | 404.3808983 | 13.42793397 | -4.912405597 | 0.012189239 |
| GIPR              | 2.234148609 | 290.9385693 | 7.024845602  | 0.012195282 |
| TUBA3C            | 714.927555  | 61.76849625 | -3.532853944 | 0.012257601 |
| ENSG00000233183.2 | 1.117074305 | 403.7332146 | 8.497533317  | 0.000735664 |
| CTPS2             | 2.234148609 | 290.0433737 | 7.020399697  | 0.012428823 |
| RPS2P12           | 530.6102947 | 31.33184593 | -4.081950992 | 0.012432554 |
| ENSG00000264982.1 | 470.2882822 | 22.37988995 | -4.393270539 | 0.012560443 |
| SDS               | 893.6594437 | 92.20514658 | -3.276805969 | 0.012569276 |
| PDRG1             | 731.6836695 | 65.34927865 | -3.484976844 | 0.012587416 |
| VAMP1             | 0           | 242.598007  | Inf          | 0.01259048  |
| NGEF              | 2.234148609 | 289.1481781 | 7.015940049  | 0.012665211 |
| SLC22A23          | 12.28781735 | 393.8860631 | 5.002477789  | 0.012665977 |
| ACAP2             | 777.483716  | 73.40603903 | -3.404841797 | 0.012719831 |
| RPS23             | 640.0835765 | 50.13095348 | -3.674486713 | 0.01281867  |
| ATP2A1            | 3.351222914 | 303.4713077 | 6.500728656  | 0.012866439 |
| FAM204A           | 628.9128335 | 48.34056229 | -3.701553916 | 0.012886859 |
| LOC100506688      | 1.117074305 | 347.335892  | 8.280462536  | 0.002151848 |
| UNK               | 6.702445828 | 339.2791316 | 5.661641231  | 0.012945218 |
| LINC00982         | 1.117074305 | 316.0040461 | 8.144074067  | 0.00433648  |
| ENSG00000227237.1 | 460.2346135 | 21.48469435 | -4.420988332 | 0.013079457 |
| HPGD              | 813.2300938 | 80.56760381 | -3.33539185  | 0.013177199 |
| FAM20A            | 4.468297218 | 315.1088505 | 6.139981313  | 0.013195608 |
| FAM24A            | 425.6053101 | 17.00871636 | -4.64516998  | 0.013372057 |
| CAMK2B            | 2.234148609 | 286.4625913 | 7.002477789  | 0.013388436 |
| DCLK3             | 2.234148609 | 286.4625913 | 7.002477789  | 0.013388436 |

|                   |             |             |              |             |
|-------------------|-------------|-------------|--------------|-------------|
| RPL35A            | 596.5176787 | 43.8645843  | -3.765436394 | 0.013519876 |
| SCUBE3            | 12.28781735 | 388.5148895 | 4.982669308  | 0.013547244 |
| LOC388734         | 456.8833906 | 21.48469435 | -4.410444838 | 0.013560677 |
| SEMA6C            | 4.468297218 | 313.3184593 | 6.131760806  | 0.013657654 |
| DDX11L10          | 603.2201245 | 45.65497549 | -3.723840561 | 0.013907015 |
| ENSG00000226088.1 | 232.3514554 | 0           | #NAME?       | 0.013957478 |
| ENSG00000257715.1 | 232.3514554 | 0           | #NAME?       | 0.013957478 |
| PLEKHN1           | 7.819520132 | 344.6503052 | 5.461909408  | 0.014103043 |
| TMC4              | 3.351222914 | 298.9953297 | 6.479291486  | 0.014126568 |
| FAIM              | 941.6936388 | 104.737885  | -3.168474407 | 0.014179497 |
| PRMT9             | 731.6836695 | 68.93006104 | -3.408014862 | 0.014214557 |
| BEGAIN            | 1352.776983 | 168.2967724 | -3.006844604 | 0.014283045 |
| IGF2              | 12.28781735 | 384.0389115 | 4.965951913  | 0.014329446 |
| DAAM2             | 8.936594437 | 353.6022612 | 5.306258537  | 0.014378404 |
| STN1              | 2.234148609 | 282.8818089 | 6.984330442  | 0.014386014 |
| TMEM25            | 3.351222914 | 298.1001341 | 6.47496556   | 0.014392033 |
| ZDHHC1            | 3.351222914 | 298.1001341 | 6.47496556   | 0.014392033 |
| GRINA             | 693.7031432 | 62.66369185 | -3.468616747 | 0.014443231 |
| LINC01347         | 1.117074305 | 254.2355498 | 7.830296814  | 0.017733542 |
| KEL               | 1.117074305 | 262.2923102 | 7.875306548  | 0.014658468 |
| NTNG2             | 1.117074305 | 262.2923102 | 7.875306548  | 0.014658468 |
| RGSL1             | 1.117074305 | 262.2923102 | 7.875306548  | 0.014658468 |
| OPN3              | 670.2445828 | 59.08290946 | -3.503874877 | 0.014772175 |
| ENSG00000237001.2 | 416.6687156 | 17.00871636 | -4.614554613 | 0.014841857 |
| RGS8              | 2.234148609 | 281.0914177 | 6.975170443  | 0.014902464 |
| SSH1              | 12.28781735 | 379.5629335 | 4.94903853   | 0.015159177 |
| FTH1              | 1529.274723 | 196.9430315 | -2.956997324 | 0.015198572 |
| AOC3              | 3.351222914 | 295.4145473 | 6.461909408  | 0.015214607 |
| FKBP5             | 1406.39655  | 179.9343152 | -2.966461183 | 0.015233135 |
| MZF1-AS1          | 1.117074305 | 249.7595718 | 7.804671006  | 0.019751403 |
| LOC101927780      | 1.117074305 | 244.3883982 | 7.773306835  | 0.022531918 |
| UCKL1-AS1         | 1.117074305 | 244.3883982 | 7.773306835  | 0.022531918 |
| BTK               | 1.117074305 | 259.6067234 | 7.860458784  | 0.015612529 |
| ITPRIP            | 4.468297218 | 306.1568945 | 6.098402209  | 0.015713301 |
| ADAT1             | 3.351222914 | 293.6241561 | 6.453139198  | 0.015784182 |
| ORC1              | 6.702445828 | 327.6415888 | 5.611287032  | 0.015803364 |
| HAX1              | 611.0396446 | 50.13095348 | -3.607492407 | 0.015834032 |
| ENSG00000257181.1 | 227.8831581 | 0           | #NAME?       | 0.015937188 |
| APH1B             | 1.117074305 | 258.7115278 | 7.855475377  | 0.015945524 |
| LOC101927021      | 1.117074305 | 242.598007  | 7.762698735  | 0.023559439 |
| PTH               | 435.6589788 | 20.58949875 | -4.403218664 | 0.015978615 |

|                   |             |             |              |             |
|-------------------|-------------|-------------|--------------|-------------|
| TRIM35            | 4.468297218 | 305.2616989 | 6.094177623  | 0.015994163 |
| DCTPP1            | 555.1859294 | 40.2838019  | -3.784699251 | 0.015995638 |
| NAGLU             | 8.936594437 | 346.4406964 | 5.27673945   | 0.016011475 |
| ACIN1             | 21.22441179 | 441.3314298 | 4.378066017  | 0.016097126 |
| LEXM              | 0           | 233.646051  | Inf          | 0.016246468 |
| PLA2G6            | 4.468297218 | 304.3665033 | 6.08994063   | 0.016280404 |
| SPATA31D4         | 310.5466567 | 5.371173587 | -5.853428878 | 0.016355633 |
| OR52I1            | 473.6395052 | 26.85586794 | -4.140480165 | 0.016418672 |
| HTRA2             | 1107.020636 | 138.7553177 | -2.996067148 | 0.016455172 |
| C2orf74           | 226.7660838 | 0           | #NAME?       | 0.016479259 |
| MKL1              | 7.819520132 | 334.8031536 | 5.420089232  | 0.01654572  |
| MIR185            | 341.8247372 | 8.951955979 | -5.254910054 | 0.016614245 |
| NHSL1             | 12.28781735 | 371.5061731 | 4.918085602  | 0.016786609 |
| ATP5D             | 471.4053565 | 26.85586794 | -4.133658899 | 0.016789499 |
| ACHE              | 2.234148609 | 274.8250486 | 6.942644539  | 0.016838774 |
| LOC105370792      | 1.117074305 | 235.4364422 | 7.719468683  | 0.028222342 |
| ZNF697            | 3.351222914 | 290.0433737 | 6.435437196  | 0.016971046 |
| CSDC2             | 1247.771998 | 162.9255988 | -2.937069136 | 0.016975145 |
| LOC401557         | 1.117074305 | 235.4364422 | 7.719468683  | 0.028222342 |
| PALM3             | 2.234148609 | 273.929853  | 6.937937537  | 0.017136246 |
| WT1-AS            | 1.117074305 | 230.9604643 | 7.691776949  | 0.031602361 |
| CLPTM1            | 15.63904026 | 395.6764543 | 4.661097331  | 0.017283313 |
| ZRSR1             | 651.2543196 | 59.97810506 | -3.440713189 | 0.017294623 |
| GATAD2B           | 6.702445828 | 322.2704152 | 5.58744029   | 0.0173511   |
| PCYT1B            | 1.117074305 | 255.1307454 | 7.835367803  | 0.01735868  |
| ENSG00000272017.1 | 555.1859294 | 42.0741931  | -3.721963496 | 0.017360634 |
| FRMD1             | 2.234148609 | 273.0346574 | 6.933215126  | 0.017440148 |
| ENSG00000242396.1 | 472.5224309 | 27.75106353 | -4.089767849 | 0.017529345 |
| LOC100506258      | 1.117074305 | 221.1133127 | 7.628916926  | 0.040525041 |
| CLSTN2            | 3.351222914 | 288.2529825 | 6.426504071  | 0.017586451 |
| RNA5SP442         | 224.5319352 | 0           | #NAME?       | 0.017627432 |
| ENSG00000229981.3 | 1.117074305 | 218.4277259 | 7.611287032  | 0.043360243 |
| NLGN4X            | 2.234148609 | 272.1394618 | 6.928477207  | 0.017750953 |
| IRS1              | 4.468297218 | 298.9953297 | 6.064253986  | 0.018110606 |
| ZNF571            | 563.0054495 | 44.75977989 | -3.65287404  | 0.018320054 |
| CACNB2            | 2.234148609 | 270.3490706 | 6.918954433  | 0.018395318 |
| ZNF398            | 2.234148609 | 270.3490706 | 6.918954433  | 0.018395318 |
| CAPN15            | 8.936594437 | 337.4887404 | 5.238970407  | 0.018400501 |
| UBE2E3            | 478.1078024 | 29.54145473 | -4.016523173 | 0.018415524 |
| FAM182B           | 1.117074305 | 214.8469435 | 7.58744029   | 0.047336536 |
| ENSG00000251661.3 | 561.8883752 | 44.75977989 | -3.650008706 | 0.018483681 |



|                            |             |             |              |             |
|----------------------------|-------------|-------------|--------------|-------------|
| ARHGEF15                   | 1.117074305 | 252.4451586 | 7.820101046  | 0.018511075 |
| PKP4-AS1                   | 1.117074305 | 213.0565523 | 7.575367457  | 0.049383258 |
| GORASP1                    | 10.05366874 | 345.5455008 | 5.10308173   | 0.018635741 |
| ZNF543                     | 817.698391  | 93.99553778 | -3.120904627 | 0.018650822 |
| ENSG00000269910.1          | 294.9076164 | 4.475977989 | -6.04191633  | 0.018688174 |
| ARC                        | 5.585371523 | 307.9472857 | 5.784886354  | 0.018706687 |
| ZNF621                     | 4.468297218 | 297.2049385 | 6.055589125  | 0.018763089 |
| GRIN1                      | 3.351222914 | 284.6722001 | 6.408470149  | 0.01885185  |
| SUMO2P11                   | 222.2977866 | 0           | #NAME?       | 0.018857612 |
| ENSG00000231312.2          | 1.117074305 | 251.549963  | 7.814976014  | 0.018914337 |
| TSPAN18                    | 0           | 228.2748775 | Inf          | 0.018922361 |
| TUBBP5                     | 0           | 228.2748775 | Inf          | 0.018922361 |
| ZNF333                     | 6.702445828 | 316.8992417 | 5.563192743  | 0.019054991 |
| TLR9                       | 3.351222914 | 283.7770045 | 6.403926223  | 0.01917484  |
| TRPC7                      | 0           | 227.3796819 | Inf          | 0.019411635 |
| CHST10                     | 2.234148609 | 267.6634838 | 6.904551368  | 0.019427281 |
| LRBA                       | 13.40489166 | 368.8205863 | 4.78208772   | 0.019433802 |
| LINC00346                  | 2.234148609 | 308.8424813 | 7.111002246  | 0.008229888 |
| SELENOF                    | 530.6102947 | 40.2838019  | -3.719380913 | 0.019652781 |
| ENSG00000267801.1          | 650.1372453 | 63.55888745 | -3.354578529 | 0.019672939 |
| RBX1                       | 659.0738397 | 65.34927865 | -3.334196891 | 0.019685633 |
| ENSG00000257433.1          | 2.234148609 | 300.7857209 | 7.072867117  | 0.009839484 |
| SMARCAL1                   | 1.117074305 | 249.7595718 | 7.804671006  | 0.019751403 |
| ZSCAN29                    | 1.117074305 | 249.7595718 | 7.804671006  | 0.019751403 |
| CRTC3                      | 7.819520132 | 324.0608064 | 5.373040659  | 0.019786941 |
| PKD1                       | 118.4098763 | 937.269791  | 2.984674966  | 0.019820515 |
| STAG3L5P-<br>PVRIG2P-PILRB | 2.234148609 | 274.8250486 | 6.942644539  | 0.016838774 |
| TRAF3IP2-AS1               | 2.234148609 | 261.3971146 | 6.870374253  | 0.022200578 |
| NBEAP5                     | 220.063638  | 0           | #NAME?       | 0.020163904 |
| ATP8                       | 587.5810842 | 51.92134468 | -3.5003883   | 0.020185176 |
| ATRNL1                     | 1.117074305 | 248.8643762 | 7.799490767  | 0.020185862 |
| CD300A                     | 1.117074305 | 248.8643762 | 7.799490767  | 0.020185862 |
| GPB1                       | 1.117074305 | 248.8643762 | 7.799490767  | 0.020185862 |
| MIR296                     | 336.2393657 | 9.847151577 | -5.093638364 | 0.02028104  |
| GRHL3                      | 13.40489166 | 365.2398039 | 4.768012535  | 0.02032418  |
| DACT2                      | 5.585371523 | 303.4713077 | 5.763763062  | 0.020355496 |
| ENOX1                      | 0           | 225.5892907 | Inf          | 0.020435964 |
| SPATA31D5P                 | 607.6884217 | 56.39732267 | -3.429633224 | 0.020548815 |
| U2AF1L4                    | 1.117074305 | 247.9691806 | 7.79429186   | 0.020631394 |
| CCT2                       | 713.8104806 | 77.88201702 | -3.196178931 | 0.020701731 |

|                   |             |             |              |             |
|-------------------|-------------|-------------|--------------|-------------|
| ENSG00000258754.3 | 2.234148609 | 226.4844863 | 6.663543269  | 0.048816972 |
| ENSG00000254812.1 | 218.9465637 | 0           | #NAME?       | 0.020843114 |
| PTP4A1P2          | 334.0052171 | 9.847151577 | -5.084020362 | 0.021001717 |
| CHRM3             | 1.117074305 | 247.073985  | 7.789074151  | 0.021088357 |
| FAM63A            | 1.117074305 | 247.073985  | 7.789074151  | 0.021088357 |
| KIF17             | 3.351222914 | 278.4058309 | 6.376357963  | 0.021186714 |
| BAIAP2-AS1        | 5.585371523 | 284.6722001 | 5.671504554  | 0.028875916 |
| TUT1              | 6.702445828 | 310.6328725 | 5.534379046  | 0.021268909 |
| RPL7AP66          | 458.0004649 | 28.64625913 | -3.998930405 | 0.021304208 |
| ADCY8             | 1481.240528 | 214.8469435 | -2.78542477  | 0.021356685 |
| ARHGAP26          | 23.4585604  | 428.7986914 | 4.192114117  | 0.021418978 |
| MIAT              | 83.78057285 | 614.1041801 | 2.87379577   | 0.043282497 |
| TDRD6             | 1.117074305 | 246.1787894 | 7.783837502  | 0.021557119 |
| C9orf3            | 4.468297218 | 290.0433737 | 6.020399697  | 0.021572183 |
| RPS3A             | 803.176425  | 97.57632017 | -3.041113942 | 0.021818043 |
| ENSG00000259353.1 | 237.9368269 | 0.895195598 | -8.054159926 | 0.021867717 |
| PRMT2             | 13.40489166 | 358.9734348 | 4.74304562   | 0.021998271 |
| ATF5              | 1.117074305 | 245.2835938 | 7.778581777  | 0.022038077 |
| SMPD4P2           | 0           | 222.9037039 | Inf          | 0.022082568 |
| MALAT1            | 1058.986441 | 177.2487284 | -2.578836935 | 0.035944349 |
| ENSG00000225408.1 | 275.9173532 | 3.580782392 | -6.267817538 | 0.022116057 |
| SLFN13            | 5.585371523 | 298.9953297 | 5.742325892  | 0.022158007 |
| BMPER             | 2.234148609 | 261.3971146 | 6.870374253  | 0.022200578 |
| LOC284798         | 857.9130659 | 138.7553177 | -2.628288401 | 0.039301519 |
| EPB41L5           | 7.819520132 | 316.8992417 | 5.340800322  | 0.022319855 |
| TBX2-AS1          | 630.0299078 | 90.41475539 | -2.800790176 | 0.045467647 |
| LINC02035         | 891.4252951 | 125.3273837 | -2.830412225 | 0.027080737 |
| ENSG00000259654.1 | 236.8197526 | 0.895195598 | -8.047370761 | 0.022528124 |
| KRT73-AS1         | 962.9180506 | 133.3841441 | -2.851825845 | 0.02411766  |
| LINC01061         | 1131.596271 | 152.1832516 | -2.894477829 | 0.019528906 |
| MIR885            | 274.8002789 | 3.580782392 | -6.261964811 | 0.022575557 |
| CDHR5             | 2.234148609 | 260.501919  | 6.865425037  | 0.022634296 |
| MOGAT2            | 0           | 222.0085083 | Inf          | 0.022659246 |
| ALOXE3            | 4.468297218 | 287.3577869 | 6.006979181  | 0.022699724 |
| ENSG00000224875.2 | 284.8539477 | 4.475977989 | -5.991875648 | 0.022707281 |
| SLC22A4           | 870.2008833 | 112.7946453 | -2.947649901 | 0.022874899 |
| DSE               | 806.5276479 | 100.261907  | -3.007950411 | 0.022887629 |
| STX8              | 561.8883752 | 50.13095348 | -3.486509974 | 0.022891379 |
| PTPRM             | 3.351222914 | 273.929853  | 6.352975036  | 0.022996384 |
| C2orf71           | 1.117074305 | 243.4932026 | 7.768012535  | 0.023038983 |
| KCNE1             | 0           | 221.1133127 | Inf          | 0.023249004 |

|                   |             |             |              |             |
|-------------------|-------------|-------------|--------------|-------------|
| TXLNG             | 719.3958522 | 83.2531906  | -3.111208373 | 0.023253429 |
| MNT               | 3.351222914 | 273.0346574 | 6.348252626  | 0.023377791 |
| CASC18            | 748.4397841 | 97.57632017 | -2.939283267 | 0.028435785 |
| EFNA4             | 491.512694  | 36.70301951 | -3.743258015 | 0.023433866 |
| ZMYND15           | 4.468297218 | 285.5673957 | 5.997962308  | 0.023469767 |
| LINC00595         | 670.2445828 | 81.46279941 | -3.040474356 | 0.02922719  |
| LOC101927501      | 580.8786384 | 66.24447424 | -3.132364753 | 0.033805751 |
| MIR5702           | 214.4782665 | 0           | #NAME?       | 0.023702116 |
| ANKH              | 11.17074305 | 337.4887404 | 4.917042312  | 0.023738223 |
| ENSG00000261505.1 | 0           | 220.2181171 | Inf          | 0.023851247 |
| MYOZ3             | 0           | 220.2181171 | Inf          | 0.023851247 |
| S1PR1             | 0           | 220.2181171 | Inf          | 0.023851247 |
| C1orf116          | 4.468297218 | 284.6722001 | 5.993432649  | 0.023858856 |
| POLR1A            | 78.19520132 | 691.0910016 | 3.143723714  | 0.023974272 |
| SCP2              | 756.2593042 | 92.20514658 | -3.035961802 | 0.024078917 |
| LINC01586         | 574.1761926 | 64.45408305 | -3.155149854 | 0.033597075 |
| CEP44             | 687.0006973 | 77.88201702 | -3.14094941  | 0.024123851 |
| PPP1R10           | 10.05366874 | 328.5367844 | 5.030260945  | 0.024159977 |
| ENSG00000205325.1 | 699.2885147 | 77.88201702 | -3.166525657 | 0.022479359 |
| MCTP2             | 4.468297218 | 283.7770045 | 5.988888724  | 0.024250785 |
| AQP4              | 634.498205  | 67.13966984 | -3.240378735 | 0.024377248 |
| ENSG00000265749.1 | 522.7907746 | 43.8645843  | -3.575105181 | 0.024438593 |
| FAM47C            | 2.234148609 | 256.9211366 | 6.845456621  | 0.024464003 |
| RHBG              | 642.3177252 | 68.93006104 | -3.220081911 | 0.024471894 |
| ENSG00000237481.1 | 270.3319817 | 3.580782392 | -6.238313543 | 0.02452645  |
| ABHD17AP6         | 396.5613781 | 20.58949875 | -4.267563564 | 0.024595672 |
| SPN               | 14.52196596 | 358.0782392 | 4.623966166  | 0.024599354 |
| FCN3              | 1.117074305 | 240.8076158 | 7.752012057  | 0.02464116  |
| RPS7P15           | 303.8442109 | 7.161564783 | -5.406913147 | 0.02471306  |
| COL11A2           | 113.9415791 | 857.5973828 | 2.912006198  | 0.024874841 |
| KCNQ3             | 14.52196596 | 357.1830436 | 4.620354912  | 0.024875046 |
| SIRT2             | 3.351222914 | 269.453875  | 6.32920687   | 0.024986012 |
| CMBL              | 0           | 218.4277259 | Inf          | 0.025090472 |
| ENSG00000266588.1 | 565.2395981 | 61.76849625 | -3.193919424 | 0.033007201 |
| ENSG00000262222.1 | 519.4395516 | 43.8645843  | -3.565827368 | 0.025121401 |
| TRDV1             | 212.2441179 | 0           | #NAME?       | 0.025192758 |
| NDST1             | 39.09760066 | 496.8335568 | 3.667610638  | 0.025239603 |
| ITGA8             | 2.234148609 | 255.1307454 | 6.835367803  | 0.025439655 |
| B3GNT2            | 673.5958057 | 76.98682142 | -3.129199743 | 0.025450783 |
| HBM               | 382.0394122 | 18.79910756 | -4.344985398 | 0.025462924 |
| CTRL              | 889.1911465 | 121.7466013 | -2.868612085 | 0.025468992 |

|                   |             |             |              |             |
|-------------------|-------------|-------------|--------------|-------------|
| CENPL             | 573.0591183 | 55.50212707 | -3.368069011 | 0.025529765 |
| ENSG00000260120.1 | 684.7665487 | 74.30123462 | -3.204154138 | 0.02209259  |
| ENSG00000261121.1 | 581.9957127 | 62.66369185 | -3.215306851 | 0.030188327 |
| LINC01785         | 577.5274155 | 60.87330066 | -3.246007935 | 0.029468717 |
| HSH2D             | 1342.723314 | 206.7901831 | -2.698922445 | 0.025800481 |
| PARP14            | 6.702445828 | 299.8905253 | 5.483604479  | 0.025824527 |
| ND6               | 3497.559648 | 468.1872977 | -2.901190963 | 0.025869284 |
| NT5C1A            | 570.8249697 | 55.50212707 | -3.362433477 | 0.025948525 |
| LINC01296         | 606.5713474 | 63.55888745 | -3.254511574 | 0.026249688 |
| SPI1              | 612.1567189 | 64.45408305 | -3.247557388 | 0.025995743 |
| LOC91450          | 513.8541801 | 50.13095348 | -3.357585435 | 0.033195834 |
| FAM160A2          | 5.585371523 | 290.0433737 | 5.698471602  | 0.026203972 |
| IPW               | 692.5860689 | 65.34927865 | -3.405750152 | 0.015948611 |
| PCDHB4            | 573.0591183 | 56.39732267 | -3.344985398 | 0.026316804 |
| NHSL2             | 1.117074305 | 238.122029  | 7.73583213   | 0.026367876 |
| MYLK4             | 0           | 216.6373347 | Inf          | 0.026370752 |
| SYNM              | 1109.254784 | 166.5063812 | -2.735941402 | 0.026419278 |
| ENSG00000250748.2 | 668.0104342 | 62.66369185 | -3.414168963 | 0.017005037 |
| SENP3             | 2.234148609 | 253.3403542 | 6.825207937  | 0.026459044 |
| PSMC1P6           | 425.6053101 | 26.85586794 | -3.986206898 | 0.026636125 |
| B4GALNT3          | 6.702445828 | 298.1001341 | 5.47496556   | 0.026679685 |
| ENSG00000260739.1 | 668.0104342 | 59.97810506 | -3.47736279  | 0.015482708 |
| HSPD1P16          | 210.0099693 | 0           | #NAME?       | 0.02671572  |
| BET1L             | 3.351222914 | 265.8730926 | 6.309906314  | 0.026757743 |
| ZEB1              | 7.819520132 | 306.1568945 | 5.291047287  | 0.026795995 |
| RPL21P111         | 230.1173068 | 0.895195598 | -8.005950833 | 0.026922988 |
| NR1I2             | 1.117074305 | 237.2268334 | 7.730398243  | 0.026971706 |
| CCDC120           | 5.585371523 | 288.2529825 | 5.689538477  | 0.027077046 |
| LOC100507670      | 526.1419975 | 46.55017109 | -3.498593837 | 0.026435855 |
| LOC100630919      | 243.5221984 | 1.790391196 | -7.087634631 | 0.027090687 |
| NEK8              | 6.702445828 | 297.2049385 | 5.470626625  | 0.02711733  |
| GRAMD4            | 11.17074305 | 328.5367844 | 4.878257852  | 0.027146183 |
| CHRFAM7A          | 352.9954803 | 15.21832516 | -4.535768213 | 0.027151249 |
| RFC1              | 7.819520132 | 305.2616989 | 5.286822701  | 0.027216152 |
| SMURF1            | 7.819520132 | 305.2616989 | 5.286822701  | 0.027216152 |
| RPL37AP8          | 283.7368734 | 5.371173587 | -5.723172492 | 0.027251696 |
| RN7SL342P         | 317.2491025 | 9.847151577 | -5.009765807 | 0.02742175  |
| UGT2B10           | 478.1078024 | 37.59821511 | -3.66859987  | 0.027488785 |
| PKP4              | 4.468297218 | 276.6154397 | 5.952012722  | 0.027523099 |
| ENSG00000233098.4 | 2.234148609 | 251.549963  | 6.814976014  | 0.027524781 |
| GLIS2             | 6.702445828 | 296.3097429 | 5.4662746    | 0.027561598 |

|                   |             |             |              |             |
|-------------------|-------------|-------------|--------------|-------------|
| JAG2              | 2016.31912  | 318.6896328 | -2.661499997 | 0.027569966 |
| TVP23C            | 1.117074305 | 236.3316378 | 7.724943813  | 0.027589834 |
| RNF144A           | 4.468297218 | 275.7202441 | 5.947336235  | 0.027954597 |
| USP19             | 30.16100622 | 439.5410386 | 3.865241406  | 0.028097997 |
| CPTP              | 775.2495674 | 102.9474938 | -2.912752108 | 0.028172845 |
| KPTN              | 1.117074305 | 235.4364422 | 7.719468683  | 0.028222342 |
| LINC01509         | 423.3711614 | 35.80782392 | -3.563576249 | 0.041761783 |
| LINC01070         | 422.2540871 | 34.01743272 | -3.633765217 | 0.039122364 |
| NPL               | 1.117074305 | 235.4364422 | 7.719468683  | 0.028222342 |
| LINC01647         | 529.4932204 | 40.2838019  | -3.716340459 | 0.019839044 |
| C11orf45          | 0           | 213.9517479 | Inf          | 0.028351693 |
| LOC284632         | 469.1712079 | 33.12223712 | -3.824242458 | 0.024215004 |
| ZNF646            | 12.28781735 | 332.1175668 | 4.756393452  | 0.028637111 |
| THTPA             | 3.351222914 | 262.2923102 | 6.290344048  | 0.028737577 |
| RPL9              | 523.9078489 | 48.34056229 | -3.438006916 | 0.028775744 |
| COX3              | 4130.940778 | 525.479816  | -2.974763122 | 0.028798565 |
| DMRT2             | 754.0251556 | 99.36671137 | -2.923778132 | 0.028810415 |
| GADD45G           | 664.6592112 | 79.67240821 | -3.060462733 | 0.028820592 |
| FCAMR             | 1.117074305 | 234.5412466 | 7.713972696  | 0.028869295 |
| POM121L9P         | 1.117074305 | 234.5412466 | 7.713972696  | 0.028869295 |
| SEMA5A-AS1        | 456.8833906 | 32.22704152 | -3.825482337 | 0.026001122 |
| RSRP1             | 5.585371523 | 284.6722001 | 5.671504554  | 0.028875916 |
| PHLDA2            | 313.8978796 | 9.847151577 | -4.994445008 | 0.028935869 |
| HHAT              | 0           | 213.0565523 | Inf          | 0.029023693 |
| WNT7B             | 0           | 213.0565523 | Inf          | 0.029023693 |
| LIFR              | 2.234148609 | 248.8643762 | 6.799490767  | 0.029216445 |
| MIRLET7DHG        | 500.4492885 | 32.22704152 | -3.956880227 | 0.01728174  |
| GALNT4            | 4.468297218 | 273.0346574 | 5.933215126  | 0.029289755 |
| LRIG1             | 18.99026318 | 372.4013687 | 4.293526571  | 0.029340902 |
| ZNF384            | 6.702445828 | 292.7289605 | 5.448734019  | 0.029403117 |
| ENSG00000260205.1 | 862.3813632 | 55.50212707 | -3.957711033 | 0.004019433 |
| GSTA3             | 385.3906351 | 21.48469435 | -4.164940357 | 0.029476707 |
| DENND5A           | 15.63904026 | 350.9166744 | 4.487904616  | 0.029481741 |
| NRIP2             | 1.117074305 | 233.646051  | 7.708455691  | 0.029530747 |
| SCDP1             | 0           | 212.1613567 | Inf          | 0.029700082 |
| SSBP3             | 3.351222914 | 260.501919  | 6.280462536  | 0.02979621  |
| LTB4R             | 2.234148609 | 247.9691806 | 6.79429186   | 0.029806649 |
| MIR1203           | 205.541672  | 0           | #NAME?       | 0.029912308 |
| MIR573            | 205.541672  | 0           | #NAME?       | 0.029912308 |
| RPL21P109         | 205.541672  | 0           | #NAME?       | 0.029912308 |
| KHNYN             | 21.22441179 | 384.0389115 | 4.177456018  | 0.029957329 |

|                   |             |             |              |             |
|-------------------|-------------|-------------|--------------|-------------|
| PPP2R5D           | 15.63904026 | 349.1262832 | 4.480525086  | 0.030150339 |
| LINC01655         | 354.1125546 | 22.37988995 | -3.983933146 | 0.043599505 |
| DBH               | 1.117074305 | 232.7508554 | 7.702917507  | 0.030206732 |
| OIT3              | 1.117074305 | 232.7508554 | 7.702917507  | 0.030206732 |
| RIBC1             | 1.117074305 | 232.7508554 | 7.702917507  | 0.030206732 |
| MMS19             | 4.468297218 | 271.2442662 | 5.923723677  | 0.030219298 |
| PGK2              | 521.6737003 | 49.23575788 | -3.405369332 | 0.030251579 |
| ENSG00000264015.1 | 382.0394122 | 21.48469435 | -4.15234032  | 0.030562226 |
| NECAB2            | 730.5665952 | 96.68112457 | -2.917709629 | 0.03047216  |
| ENSG00000235140.1 | 421.1370128 | 23.27508554 | -4.177431301 | 0.022520769 |
| ENSG00000258481.1 | 406.6150469 | 21.48469435 | -4.242282445 | 0.023410459 |
| MIR6082           | 204.4245977 | 0           | #NAME?       | 0.030755335 |
| DCPS              | 622.2103877 | 72.51084343 | -3.10113382  | 0.030784898 |
| GLDC              | 6.702445828 | 290.0433737 | 5.435437196  | 0.030848634 |
| SPAG4             | 1.117074305 | 231.8556599 | 7.697357982  | 0.03089727  |
| ENSG00000259432.1 | 476.9907281 | 40.2838019  | -3.565689469 | 0.031098739 |
| FEM1A             | 10.05366874 | 312.4232637 | 4.957707919  | 0.031137585 |
| RSPH3             | 4.468297218 | 269.453875  | 5.914169371  | 0.031186238 |
| TMCO4             | 4.468297218 | 269.453875  | 5.914169371  | 0.031186238 |
| ASXL1             | 5.585371523 | 280.1962221 | 5.648640446  | 0.031199448 |
| ENSG00000260091.1 | 663.5421369 | 34.01743272 | -4.285841913 | 0.004655799 |
| PDS5A             | 7.819520132 | 297.2049385 | 5.248234203  | 0.031337441 |
| APIG2             | 3.351222914 | 257.8163322 | 6.265512195  | 0.031463799 |
| POTEC             | 3.351222914 | 257.8163322 | 6.265512195  | 0.031463799 |
| ENSG00000270093.1 | 315.0149539 | 16.11352076 | -4.289076657 | 0.048265229 |
| PODXL2            | 2.234148609 | 245.2835938 | 6.778581777  | 0.031661862 |
| NAV3              | 4.468297218 | 268.5586794 | 5.909368385  | 0.031685488 |
| SLC25A51          | 730.5665952 | 98.47151577 | -2.891237418 | 0.031722659 |
| ENSG00000268573.1 | 1013.186394 | 48.34056229 | -4.389521544 | 0.001285056 |
| TH                | 0           | 209.4757699 | Inf          | 0.03176365  |
| TMEM92            | 0           | 209.4757699 | Inf          | 0.03176365  |
| KRT18P42          | 373.1028177 | 20.58949875 | -4.179592642 | 0.031799228 |
| LOC100289333      | 340.7076629 | 15.21832516 | -4.484652897 | 0.031834663 |
| PI4K2A            | 6.702445828 | 288.2529825 | 5.426504071  | 0.031840685 |
| OTUD6A            | 494.8639169 | 44.75977989 | -3.466757005 | 0.031859461 |
| CES5A             | 3.351222914 | 256.9211366 | 6.26049412   | 0.032042062 |
| POC1B-GALNT4      | 3.351222914 | 256.9211366 | 6.26049412   | 0.032042062 |
| TAF1L             | 3.351222914 | 256.9211366 | 6.26049412   | 0.032042062 |
| ENSG00000256311.1 | 498.2151399 | 45.65497549 | -3.447924864 | 0.032049397 |
| LOC100420027      | 223.4148609 | 0.895195598 | -7.963306496 | 0.032166762 |
| GLTSCR1L          | 4.468297218 | 267.6634838 | 5.904551368  | 0.032196277 |

|                   |             |             |              |             |
|-------------------|-------------|-------------|--------------|-------------|
| TAF9BP1           | 402.1467497 | 25.96067234 | -3.953322407 | 0.032202035 |
| SLC25A41          | 1.117074305 | 230.0652687 | 7.686174243  | 0.032321987 |
| ENSG00000234693.1 | 360.8150004 | 18.79910756 | -4.262523238 | 0.032378677 |
| POP7              | 415.5516413 | 28.64625913 | -3.858609117 | 0.032419957 |
| ENSG00000254539.1 | 420.0199385 | 29.54145473 | -3.829645038 | 0.032456451 |
| NR1H2             | 8.936594437 | 302.5761121 | 5.08142913   | 0.032481442 |
| MIR33A            | 202.1904491 | 0           | #NAME?       | 0.032512012 |
| DDX50P1           | 551.8347065 | 58.18771386 | -3.245449725 | 0.032523213 |
| POU3F2            | 928.2887471 | 143.2312957 | -2.696226878 | 0.032573726 |
| RPL23             | 612.1567189 | 72.51084343 | -3.077632386 | 0.03280464  |
| LOC100271717      | 317.2491025 | 11.63754277 | -4.768757707 | 0.032857955 |
| TARS2P1           | 561.8883752 | 60.87330066 | -3.206402055 | 0.032890582 |
| AFF2              | 2.234148609 | 243.4932026 | 6.768012535  | 0.032973802 |
| FZD3              | 2.234148609 | 243.4932026 | 6.768012535  | 0.032973802 |
| SMYD4             | 2.234148609 | 243.4932026 | 6.768012535  | 0.032973802 |
| PCCA-AS1          | 641.2006508 | 25.96067234 | -4.626376238 | 0.003122787 |
| OR56A5            | 272.5661303 | 5.371173587 | -5.665225143 | 0.033032121 |
| GNA15             | 1.117074305 | 229.1700731 | 7.680549694  | 0.033056113 |
| FBRSL1            | 12.28781735 | 322.2704152 | 4.712971172  | 0.033113304 |
| ELMO1             | 5.585371523 | 276.6154397 | 5.630084627  | 0.033133273 |
| ENSG00000233625.1 | 312.7808053 | 12.53273837 | -4.641378401 | 0.038074706 |
| MXRA7             | 3.351222914 | 255.1307454 | 6.250405302  | 0.033234052 |
| RIMBP2            | 32.39515483 | 433.2746694 | 3.741431936  | 0.033236485 |
| ENSG00000238160.1 | 563.0054495 | 61.76849625 | -3.188205773 | 0.033527928 |
| LOC105374366      | 412.2004184 | 16.11352076 | -4.677002311 | 0.014444632 |
| TSR2              | 2.234148609 | 242.598007  | 6.762698735  | 0.033654137 |
| ENSG00000259201.1 | 373.1028177 | 21.48469435 | -4.118192098 | 0.033658311 |
| ENSG00000223831.1 | 383.1564865 | 23.27508554 | -4.041075354 | 0.033689759 |
| CARD6             | 1.117074305 | 228.2748775 | 7.674903131  | 0.033804682 |
| ENSG00000240292.1 | 308.3125081 | 11.63754277 | -4.727535045 | 0.037671259 |
| TESK1             | 4.468297218 | 264.977897  | 5.89000306   | 0.033806294 |
| RET               | 1754.923733 | 301.6809165 | -2.54031299  | 0.033879168 |
| FAM198A           | 0           | 206.7901831 | Inf          | 0.033899996 |
| ENSG00000259780.2 | 312.7808053 | 11.63754277 | -4.748293605 | 0.03518335  |
| DDX1              | 576.4103412 | 65.34927865 | -3.140853003 | 0.033959042 |
| KIF26B            | 40.21467497 | 467.2921021 | 3.538530689  | 0.034141794 |
| CD79B             | 785.3032361 | 114.5850365 | -2.776831185 | 0.034284895 |
| C19orf12          | 2.234148609 | 241.7028114 | 6.757365291  | 0.03435106  |
| MEFV              | 4.468297218 | 264.0827014 | 5.885120838  | 0.034371893 |
| RIMS2             | 4.468297218 | 264.0827014 | 5.885120838  | 0.034371893 |
| ENSG00000263218.2 | 199.9563005 | 0           | #NAME?       | 0.034382931 |

|                   |             |             |              |             |
|-------------------|-------------|-------------|--------------|-------------|
| ENSG00000236016.3 | 345.1759601 | 17.00871636 | -4.34298582  | 0.034383973 |
| NEURL2            | 456.8833906 | 38.49341071 | -3.569142584 | 0.034472956 |
| TIMELESS          | 8.936594437 | 298.9953297 | 5.064253986  | 0.034509729 |
| XXYLT1            | 1.117074305 | 227.3796819 | 7.669234381  | 0.034569767 |
| ZDHHC22           | 1.117074305 | 227.3796819 | 7.669234381  | 0.034569767 |
| EEF1A2            | 690.3519203 | 93.10034218 | -2.890473616 | 0.034620633 |
| CICP11            | 0           | 205.8949875 | Inf          | 0.034633723 |
| KRT9              | 0           | 205.8949875 | Inf          | 0.034633723 |
| LILRP2            | 0           | 205.8949875 | Inf          | 0.034633723 |
| LINC01162         | 299.3759136 | 9.847151577 | -4.926107878 | 0.036687571 |
| PADI6             | 0           | 205.8949875 | Inf          | 0.034633723 |
| ZBTB34            | 0           | 205.8949875 | Inf          | 0.034633723 |
| ENSG00000228620.1 | 308.3125081 | 10.74234717 | -4.843012262 | 0.034654218 |
| ENSG00000254688.1 | 365.2832976 | 20.58949875 | -4.149035175 | 0.034655463 |
| FUT4              | 11.17074305 | 312.4232637 | 4.805704825  | 0.0347304   |
| PCDHGB3           | 4.468297218 | 263.1875058 | 5.880222039  | 0.034953601 |
| PPP1R7            | 4.468297218 | 263.1875058 | 5.880222039  | 0.034953601 |
| SEMA7A            | 2.234148609 | 240.8076158 | 6.752012057  | 0.035064713 |
| ZZEF1             | 131.8147679 | 857.5973828 | 2.70178849   | 0.035094078 |
| IMMP2L            | 338.4735143 | 16.11352076 | -4.392699288 | 0.035107576 |
| OGFOD1            | 567.4737467 | 64.45408305 | -3.138209991 | 0.035176677 |
| RPL26P18          | 220.063638  | 0.895195598 | -7.941502125 | 0.03517922  |
| ENSG00000263004.1 | 481.4590253 | 15.21832516 | -4.983531524 | 0.005811843 |
| XXYLT1-AS1        | 366.4003719 | 9.847151577 | -5.217570692 | 0.01303793  |
| RN7SL125P         | 198.8392262 | 0           | #NAME?       | 0.035369157 |
| ARHGAP30          | 14.52196596 | 330.3271756 | 4.507586982  | 0.035477414 |
| SLC30A6           | 697.0543661 | 95.78592897 | -2.863385538 | 0.035488931 |
| NELL1             | 4.468297218 | 262.2923102 | 5.875306548  | 0.03555246  |
| ZBTB7B            | 4.468297218 | 262.2923102 | 5.875306548  | 0.03555246  |
| RPLP0P4           | 387.6247837 | 25.06547674 | -3.950887237 | 0.035601037 |
| SPG7              | 11.17074305 | 310.6328725 | 4.797413452  | 0.035695744 |
| ATP1B2            | 3.351222914 | 251.549963  | 6.230013514  | 0.035769306 |
| PLK3              | 2.234148609 | 239.9124202 | 6.746638884  | 0.035795224 |
| EIF4HP2           | 289.3222449 | 8.056760381 | -5.166333592 | 0.035862038 |
| UBTFL1            | 251.3417185 | 3.580782392 | -6.133231497 | 0.035904716 |
| ENSG00000255246.1 | 502.6834371 | 13.42793397 | -5.226340902 | 0.003643162 |
| NCBP3             | 8.936594437 | 296.3097429 | 5.051237101  | 0.036115917 |
| ENSG00000238054.1 | 268.0978331 | 7.161564783 | -5.226340902 | 0.045547213 |
| ENSG00000236065.2 | 336.2393657 | 16.11352076 | -4.383144981 | 0.036158111 |
| KRT82             | 1.117074305 | 225.5892907 | 7.657829618  | 0.036166557 |
| ECE1              | 24.5756347  | 384.9341071 | 3.969310925  | 0.03618917  |



|                   |             |             |              |             |
|-------------------|-------------|-------------|--------------|-------------|
| ACTG1P24          | 316.1320282 | 12.53273837 | -4.656753627 | 0.036211291 |
| ENSG00000260304.1 | 259.1612387 | 4.475977989 | -5.855503206 | 0.036296002 |
| FDFT1             | 18.99026318 | 353.6022612 | 4.218795696  | 0.036297124 |
| RPS20             | 498.2151399 | 49.23575788 | -3.338990492 | 0.03641715  |
| IFT52             | 536.1956662 | 58.18771386 | -3.203973089 | 0.03643647  |
| ANTXR2            | 3.351222914 | 250.6547674 | 6.22487021   | 0.036436726 |
| EIF4E1B           | 864.6155118 | 136.0697309 | -2.667712549 | 0.036583629 |
| GAPVD1            | 8.936594437 | 295.4145473 | 5.046871908  | 0.036667161 |
| ENSG00000249086.1 | 299.3759136 | 9.847151577 | -4.926107878 | 0.036687571 |
| LOC101928523      | 388.741858  | 8.951955979 | -5.440465707 | 0.008461648 |
| DPP8              | 11.17074305 | 308.8424813 | 4.789074151  | 0.036689924 |
| APOC1P1           | 379.8052636 | 24.17028114 | -3.97395374  | 0.036728741 |
| GEMIN4            | 5.585371523 | 270.3490706 | 5.597026338  | 0.036769694 |
| SAP30BP           | 4.468297218 | 260.501919  | 5.865425037  | 0.03678913  |
| ENSG00000250407.1 | 325.0686226 | 14.32312957 | -4.504325649 | 0.036816646 |
| ENSG00000231329.3 | 0           | 203.2094007 | Inf          | 0.036918885 |
| FAM86GP           | 1.117074305 | 224.6940951 | 7.652093248  | 0.036997642 |
| RALGDS            | 10.05366874 | 301.6809165 | 4.907229474  | 0.037000361 |
| GLTSCR2           | 556.3030037 | 63.55888745 | -3.129705119 | 0.037032507 |
| DHCR24            | 1472.303933 | 261.3971146 | -2.493760402 | 0.037042445 |
| CTDSP1            | 6.702445828 | 279.3010265 | 5.380989412  | 0.037066532 |
| ENSG00000267045.1 | 592.0493814 | 12.53273837 | -5.561943933 | 0.001129027 |
| HEXIM2            | 3.351222914 | 249.7595718 | 6.219708505  | 0.037118352 |
| NLRP8             | 3.351222914 | 249.7595718 | 6.219708505  | 0.037118352 |
| EEF1A1            | 2295.587696 | 398.3620411 | -2.526711459 | 0.037136572 |
| TOR2A             | 7.819520132 | 287.3577869 | 5.199624259  | 0.037160956 |
| STXBP5L           | 2.234148609 | 238.122029  | 6.73583213   | 0.037307272 |
| TCP10L            | 2.234148609 | 238.122029  | 6.73583213   | 0.037307272 |
| COX2              | 5061.463674 | 618.5801581 | -3.032522181 | 0.03737629  |
| HINFP             | 4.468297218 | 259.6067234 | 5.860458784  | 0.037424558 |
| KRT78             | 4.468297218 | 259.6067234 | 5.860458784  | 0.037424558 |
| PCBD2             | 547.3664093 | 61.76849625 | -3.147563788 | 0.037431869 |
| PBX2              | 10.05366874 | 300.7857209 | 4.902942115  | 0.037546009 |
| TRDC              | 249.1075699 | 3.580782392 | -6.120350206 | 0.037611741 |
| TNFRSF11B         | 520.556626  | 55.50212707 | -3.22944014  | 0.037636165 |
| HIF1A-AS1         | 265.8636845 | 5.371173587 | -5.629305569 | 0.037075906 |
| TESMIN            | 0           | 202.3142051 | Inf          | 0.037713715 |
| ZNF718            | 0           | 202.3142051 | Inf          | 0.037713715 |
| HRH1              | 3.351222914 | 248.8643762 | 6.214528266  | 0.037814587 |
| EHBP1L1           | 13.40489166 | 319.5848284 | 4.575367457  | 0.037843617 |
| CNTFR             | 1.117074305 | 223.7988995 | 7.646333979  | 0.037849748 |

|                   |             |             |              |             |
|-------------------|-------------|-------------|--------------|-------------|
| PTGES3L-AARSD1    | 4.468297218 | 258.7115278 | 5.855475377  | 0.038071774 |
| LOC101929224      | 348.527183  | 6.266369185 | -5.797497603 | 0.009769098 |
| CRB1              | 2.234148609 | 237.2268334 | 6.730398243  | 0.038088999 |
| GAS6              | 2.234148609 | 237.2268334 | 6.730398243  | 0.038088999 |
| USP49             | 2.234148609 | 237.2268334 | 6.730398243  | 0.038088999 |
| PALM2-AKAP2       | 6.702445828 | 277.5106353 | 5.371711599  | 0.038158544 |
| AACS              | 5.585371523 | 267.6634838 | 5.582623273  | 0.038468736 |
| C5orf30           | 759.6105271 | 114.5850365 | -2.728841242 | 0.038515517 |
| ARHGAP20          | 0           | 201.4190095 | Inf          | 0.03852787  |
| TCEA3             | 0           | 201.4190095 | Inf          | 0.03852787  |
| GPS1              | 10.05366874 | 298.9953297 | 4.894328985  | 0.038663645 |
| CRTAP             | 6.702445828 | 276.6154397 | 5.367050221  | 0.0387123   |
| FAM43A            | 1.117074305 | 222.9037039 | 7.640551626  | 0.038722201 |
| IGFALS            | 1.117074305 | 222.9037039 | 7.640551626  | 0.038722201 |
| HTR4              | 4.468297218 | 257.8163322 | 5.850474695  | 0.038731082 |
| SERPINH1P1        | 538.4298148 | 60.87330066 | -3.144876801 | 0.03885664  |
| ENSG00000262332.1 | 359.6979261 | 21.48469435 | -4.065404683 | 0.038940892 |
| APEX2             | 632.2640564 | 84.1483862  | -2.909519697 | 0.038943138 |
| HK2               | 49.1512694  | 490.5671876 | 3.319150158  | 0.038986371 |
| ENSG00000259534.1 | 303.8442109 | 5.371173587 | -5.821950647 | 0.018608198 |
| METRNL            | 442.3614246 | 38.49341071 | -3.522542171 | 0.03921907  |
| VWA1              | 3.351222914 | 247.073985  | 6.20411165   | 0.039252557 |
| CMTR1             | 6.702445828 | 275.7202441 | 5.362373734  | 0.039271861 |
| LOC100133669      | 268.0978331 | 4.475977989 | -5.904412807 | 0.030643583 |
| EML3              | 13.40489166 | 316.8992417 | 4.563192743  | 0.039349673 |
| LINGO1            | 7.819520132 | 283.7770045 | 5.181533802  | 0.039460394 |
| CD40              | 597.634753  | 76.09162582 | -2.973454451 | 0.039476159 |
| CERCAM            | 1.117074305 | 222.0085083 | 7.634746004  | 0.039614245 |
| HIPK4             | 1.117074305 | 222.0085083 | 7.634746004  | 0.039614245 |
| SMAD6             | 1.117074305 | 222.0085083 | 7.634746004  | 0.039614245 |
| ZBTB46            | 6.702445828 | 274.8250486 | 5.357682039  | 0.039837747 |
| VWA3B             | 13.40489166 | 316.0040461 | 4.559111567  | 0.039865385 |
| MYO1E             | 12.28781735 | 309.7376769 | 4.655746303  | 0.039918461 |
| LOC392364         | 385.3906351 | 26.85586794 | -3.843012262 | 0.04003654  |
| DRC3              | 7.819520132 | 282.8818089 | 5.17697552   | 0.040047189 |
| ATP6V0CP3         | 366.4003719 | 23.27508554 | -3.976562592 | 0.040192884 |
| HSPD1P12          | 261.3953873 | 5.371173587 | -5.604852525 | 0.040197699 |
| DKK3              | 0           | 199.6286183 | Inf          | 0.040221421 |
| TRIM56            | 5.585371523 | 264.977897  | 5.568074965  | 0.040282185 |
| CCDC89            | 470.2882822 | 45.65497549 | -3.364701387 | 0.040334412 |
| ENSG00000255670.1 | 258.0441644 | 3.580782392 | -6.171199347 | 0.031282732 |

|                   |             |             |              |             |
|-------------------|-------------|-------------|--------------|-------------|
| CEP170            | 785.3032361 | 123.5369925 | -2.668306728 | 0.040599558 |
| RPS8              | 557.420078  | 67.13966984 | -3.053527621 | 0.040618654 |
| MPHOSPH6          | 322.834474  | 15.21832516 | -4.406913147 | 0.040662168 |
| PER3              | 3.351222914 | 245.2835938 | 6.193619276  | 0.040754112 |
| MAGT1             | 517.205403  | 57.29251826 | -3.174318689 | 0.040772919 |
| NDUFB4P1          | 193.2538547 | 0           | #NAME?       | 0.04080496  |
| ENSG00000247498.5 | 551.8347065 | 66.24447424 | -3.058364172 | 0.041179326 |
| CSNK2A2           | 452.4150934 | 42.0741931  | -3.426639552 | 0.041208828 |
| FUT3              | 537.3127405 | 62.66369185 | -3.100060373 | 0.041239342 |
| ZNF883            | 424.4882358 | 35.80782392 | -3.567377819 | 0.041336441 |
| MATN2             | 1.117074305 | 220.2181171 | 7.623064199  | 0.041453663 |
| MYO1H             | 1.117074305 | 220.2181171 | 7.623064199  | 0.041453663 |
| ZBTB48            | 1.117074305 | 220.2181171 | 7.623064199  | 0.041453663 |
| HERC6             | 4.468297218 | 254.2355498 | 5.830296814  | 0.041495709 |
| G6PC              | 3.351222914 | 244.3883982 | 6.188344334  | 0.041529879 |
| ENSG00000273009.1 | 265.8636845 | 3.580782392 | -6.214268069 | 0.026714279 |
| MTERF3            | 513.8541801 | 57.29251826 | -3.164940357 | 0.041799128 |
| AACSP1            | 0           | 197.8382271 | Inf          | 0.042010468 |
| CTC-338M12.4      | 351.878406  | 4.475977989 | -6.296730229 | 0.006240698 |
| CCDC7             | 679.1811772 | 99.36671137 | -2.772961953 | 0.042079553 |
| ENSG00000267138.1 | 265.8636845 | 6.266369185 | -5.406913147 | 0.042172508 |
| GOLGA1            | 4.468297218 | 253.3403542 | 5.825207937  | 0.04222042  |
| ACY1              | 5.585371523 | 262.2923102 | 5.553378454  | 0.042235788 |
| COBLL1            | 5.585371523 | 262.2923102 | 5.553378454  | 0.042235788 |
| PPP1R26P1         | 2.234148609 | 232.7508554 | 6.702917507  | 0.042256962 |
| AGAP12P           | 628.9128335 | 86.83397299 | -2.856528576 | 0.042259968 |
| ABCC12            | 3.351222914 | 243.4932026 | 6.183050035  | 0.042322943 |
| ATP10D            | 3.351222914 | 243.4932026 | 6.183050035  | 0.042322943 |
| PCDHGB2           | 1.117074305 | 219.3229215 | 7.617187633  | 0.042399099 |
| RPAIN             | 1.117074305 | 219.3229215 | 7.617187633  | 0.042399099 |
| ZSCAN12P1         | 1.117074305 | 219.3229215 | 7.617187633  | 0.042399099 |
| CENPT             | 7.819520132 | 279.3010265 | 5.158596991  | 0.042426261 |
| MEF2D             | 12.28781735 | 305.2616989 | 4.634746004  | 0.04269259  |
| BEND3P1           | 11.17074305 | 298.9953297 | 4.742325892  | 0.042825998 |
| SELPLG            | 11.17074305 | 298.9953297 | 4.742325892  | 0.042825998 |
| NKRF              | 510.5029572 | 57.29251826 | -3.155500661 | 0.042852764 |
| TMBIM4            | 346.2930344 | 20.58949875 | -4.072012755 | 0.042881047 |
| ENSG00000229190.1 | 212.2441179 | 0.895195598 | -7.889305914 | 0.042941454 |
| AKR1C1            | 264.7466102 | 6.266369185 | -5.400838633 | 0.04297935  |
| DNAJC11           | 7.819520132 | 278.4058309 | 5.153965542  | 0.04303041  |
| TBXAS1            | 987.4936853 | 174.5631416 | -2.500022552 | 0.043103734 |

|                   |             |             |              |             |
|-------------------|-------------|-------------|--------------|-------------|
| CILP2             | 3.351222914 | 242.598007  | 6.177736235  | 0.043134014 |
| MRPL22            | 454.649242  | 43.8645843  | -3.373625446 | 0.043145201 |
| RPL6              | 681.4153258 | 101.1571026 | -2.751936776 | 0.043159063 |
| ENSG00000231527.1 | 256.9270901 | 2.685586794 | -6.579977856 | 0.02596254  |
| ENSG00000236653.1 | 291.5563935 | 1.790391196 | -7.347356303 | 0.009354965 |
| SH2D2A            | 1.117074305 | 218.4277259 | 7.611287032  | 0.043360243 |
| PPA2              | 349.6442573 | 21.48469435 | -4.024506652 | 0.043516849 |
| TAF1D             | 453.5321677 | 43.8645843  | -3.370076379 | 0.043553988 |
| ENSG00000224235.1 | 225.6490095 | 0.895195598 | -7.977661789 | 0.030299357 |
| GRK5              | 4.468297218 | 251.549963  | 5.814976014  | 0.043712651 |
| IQCA1             | 4.468297218 | 251.549963  | 5.814976014  | 0.043712651 |
| ZMAT3             | 4.468297218 | 251.549963  | 5.814976014  | 0.043712651 |
| ELFN1             | 8.936594437 | 284.6722001 | 4.993432649  | 0.04384681  |
| STX1A             | 3.351222914 | 241.7028114 | 6.17240279   | 0.043963933 |
| CNN3P1            | 317.2491025 | 15.21832516 | -4.381734584 | 0.043978374 |
| CDH15             | 2.234148609 | 230.9604643 | 6.691776949  | 0.044045401 |
| KIAA1841          | 2.234148609 | 230.9604643 | 6.691776949  | 0.044045401 |
| INS-IGF2          | 11.17074305 | 297.2049385 | 4.73366103   | 0.044063449 |
| NKAIN2            | 538.4298148 | 65.34927865 | -3.042515083 | 0.044079607 |
| AMPH              | 1.117074305 | 217.5325303 | 7.605362198  | 0.044335899 |
| DCANP1            | 1.117074305 | 217.5325303 | 7.605362198  | 0.044335899 |
| GNB3              | 1.117074305 | 217.5325303 | 7.605362198  | 0.044335899 |
| MAN1C1            | 1.117074305 | 217.5325303 | 7.605362198  | 0.044335899 |
| NEFL              | 1.117074305 | 217.5325303 | 7.605362198  | 0.044335899 |
| QRFPR             | 1.117074305 | 217.5325303 | 7.605362198  | 0.044335899 |
| TSSC2             | 1.117074305 | 217.5325303 | 7.605362198  | 0.044335899 |
| ENSG00000230437.1 | 239.0539012 | 0.895195598 | -8.060917292 | 0.021227463 |
| ENSG00000259409.1 | 189.9026318 | 0           | #NAME?       | 0.044430997 |
| CHRNA4            | 826.6349854 | 138.7553177 | -2.574707361 | 0.044436124 |
| TEAD4             | 4.468297218 | 250.6547674 | 5.809832711  | 0.044480942 |
| XPOTP1            | 392.0930809 | 30.43665033 | -3.687314685 | 0.044499211 |
| LOC780780         | 480.341951  | 51.02614908 | -3.234753141 | 0.044512902 |
| RPL3              | 780.8349389 | 128.0129705 | -2.608727615 | 0.044798547 |
| WISP1             | 3.351222914 | 240.8076158 | 6.167049556  | 0.044812857 |
| WWTR1             | 3.351222914 | 240.8076158 | 6.167049556  | 0.044812857 |
| C21orf58          | 13.40489166 | 307.9472857 | 4.521851948  | 0.044818869 |
| LOC646626         | 293.7905421 | 0.895195598 | -8.358369295 | 0.005668792 |
| EPS8L1            | 7.819520132 | 275.7202441 | 5.139981313  | 0.044872107 |
| EOGT              | 943.9277874 | 167.4015768 | -2.495363377 | 0.04489723  |
| HAO2              | 442.3614246 | 42.0741931  | -3.394218074 | 0.044926768 |
| CPEB1             | 662.4250626 | 98.47151577 | -2.749978887 | 0.045121886 |

|                   |             |             |              |             |
|-------------------|-------------|-------------|--------------|-------------|
| TRAV1-2           | 247.9904956 | 4.475977989 | -5.791938077 | 0.045205992 |
| MIR8088           | 210.0099693 | 0.895195598 | -7.874039158 | 0.045263762 |
| SOCS7             | 54.73664093 | 494.14797   | 3.174364307  | 0.0452906   |
| C1orf106          | 6.702445828 | 266.7682882 | 5.314755714  | 0.045319161 |
| FTCD              | 1.117074305 | 216.6373347 | 7.599412931  | 0.045324774 |
| VIT               | 1.117074305 | 216.6373347 | 7.599412931  | 0.045324774 |
| WDR38             | 1.117074305 | 216.6373347 | 7.599412931  | 0.045324774 |
| ELN               | 60.32201245 | 515.6326644 | 3.095587193  | 0.045455435 |
| ENSG00000261166.1 | 518.3224773 | 0           | #NAME?       | 2.06E-05    |
| B2M               | 402.1467497 | 33.12223712 | -3.601850037 | 0.0454701   |
| SETD2             | 20.10733748 | 340.1743272 | 4.080480301  | 0.045502644 |
| ENSG00000266927.2 | 420.0199385 | 0           | #NAME?       | 0.000137134 |
| NXNL2             | 436.7760531 | 41.1789975  | -3.406913147 | 0.045636698 |
| ENSG00000224049.1 | 352.9954803 | 0           | #NAME?       | 0.00056012  |
| ILVBL             | 8.936594437 | 281.9866133 | 4.979757712  | 0.045780308 |
| S100A7A           | 0           | 194.2574447 | Inf          | 0.045863483 |
| PPIEL             | 2.234148609 | 229.1700731 | 6.680549694  | 0.04590267  |
| STAG3L3           | 487.0443968 | 53.71173587 | -3.180744035 | 0.045939513 |
| CTTNBP2           | 4.468297218 | 248.8643762 | 5.799490767  | 0.04606389  |
| LOC390586         | 493.7468426 | 55.50212707 | -3.153156555 | 0.046070942 |
| MVK               | 1.117074305 | 215.7421391 | 7.59343903   | 0.046325481 |
| OLFM1             | 1.117074305 | 215.7421391 | 7.59343903   | 0.046325481 |
| PARP12            | 1.117074305 | 215.7421391 | 7.59343903   | 0.046325481 |
| SLC25A53          | 1.117074305 | 215.7421391 | 7.59343903   | 0.046325481 |
| RN7SL635P         | 266.9807588 | 7.161564783 | -5.220317114 | 0.046371125 |
| TPM3P9            | 492.6297683 | 55.50212707 | -3.149888841 | 0.046463004 |
| DIXDC1            | 29.04393192 | 382.2485203 | 3.718202235  | 0.046546119 |
| FAM222A           | 7.819520132 | 273.0346574 | 5.125860204  | 0.046768386 |
| PIAS4             | 700.405589  | 110.1090585 | -2.669257433 | 0.046792911 |
| CCDC130           | 2.234148609 | 228.2748775 | 6.674903131  | 0.046856884 |
| GK5               | 2.234148609 | 228.2748775 | 6.674903131  | 0.046856884 |
| TRIM36            | 2.234148609 | 228.2748775 | 6.674903131  | 0.046856884 |
| HTRA3             | 4.468297218 | 247.9691806 | 5.79429186   | 0.046879392 |
| LINC01473         | 246.8734213 | 0           | #NAME?       | 0.00907388  |
| LACTBL1           | 0           | 193.3622491 | Inf          | 0.046880548 |
| CCND2-AS1         | 220.063638  | 0           | #NAME?       | 0.020163904 |
| NMUR1             | 0           | 193.3622491 | Inf          | 0.046880548 |
| PHLPP1            | 18.99026318 | 332.1175668 | 4.128362229  | 0.04698374  |
| RHO               | 967.3863478 | 176.3535328 | -2.455621701 | 0.047095568 |
| TMSB4X            | 630.0299078 | 92.20514658 | -2.772501131 | 0.047252663 |
| ENSG00000235450.1 | 218.9465637 | 0           | #NAME?       | 0.020843114 |

|                   |             |             |              |             |
|-------------------|-------------|-------------|--------------|-------------|
| DKC1              | 6.702445828 | 264.0827014 | 5.300158338  | 0.04736185  |
| GPATCH3           | 3.351222914 | 238.122029  | 6.150869629  | 0.047474726 |
| NAIF1             | 4.468297218 | 247.073985  | 5.789074151  | 0.047711494 |
| FEM1AP2           | 0           | 192.4670535 | Inf          | 0.047917704 |
| PRDM13            | 0           | 192.4670535 | Inf          | 0.047917704 |
| ENSG00000259861.1 | 214.4782665 | 0           | #NAME?       | 0.023702116 |
| ZNF497            | 0           | 192.4670535 | Inf          | 0.047917704 |
| RPPH1             | 750.6739327 | 124.4321881 | -2.592826656 | 0.048016792 |
| CST3              | 796.4739792 | 136.0697309 | -2.549281059 | 0.04803988  |
| PCSK1N            | 426.7223844 | 40.2838019  | -3.405026038 | 0.048213697 |
| FAM27B            | 207.7758207 | 0           | #NAME?       | 0.028283563 |
| ENSG00000251458.1 | 198.8392262 | 0           | #NAME?       | 0.035369157 |
| CNPPD1            | 3.351222914 | 237.2268334 | 6.145435743  | 0.048400656 |
| SNAP29            | 3.351222914 | 237.2268334 | 6.145435743  | 0.048400656 |
| SH3TC1            | 1315.913531 | 256.9211366 | -2.356667203 | 0.048446497 |
| UAP1L1            | 4.468297218 | 246.1787894 | 5.783837502  | 0.048560651 |
| DEFB124           | 322.834474  | 17.90391196 | -4.172447894 | 0.048728295 |
| PIH1D1            | 7.819520132 | 270.3490706 | 5.111599511  | 0.048735407 |
| SELENOO           | 627.7957592 | 93.10034218 | -2.753436908 | 0.048764065 |
| MPG               | 607.6884217 | 87.72916859 | -2.792203303 | 0.048780582 |
| PRRT1             | 587.5810842 | 82.35799501 | -2.834807339 | 0.048801145 |
| KIAA1191          | 6.702445828 | 262.2923102 | 5.290344048  | 0.048805527 |
| SMOX              | 6.702445828 | 262.2923102 | 5.290344048  | 0.048805527 |
| ENSG00000228639.2 | 189.9026318 | 0           | #NAME?       | 0.044430997 |
| SLC25A35          | 2.234148609 | 226.4844863 | 6.663543269  | 0.048816972 |
| ENSG00000254563.1 | 206.6587464 | 0.895195598 | -7.850831767 | 0.048836064 |
| KPNA2P2           | 489.2785454 | 56.39732267 | -3.116957442 | 0.048930021 |
| ENSG00000254363.2 | 0           | 191.5718579 | Inf          | 0.048974122 |
| ENSG00000266774.1 | 188.7855575 | 0           | #NAME?       | 0.045693085 |
| SRRM3             | 676.9470286 | 106.5282761 | -2.667806526 | 0.049116698 |
| HAS3              | 17.87318887 | 323.1656108 | 4.176404721  | 0.049244685 |
| EFHC1             | 3.351222914 | 236.3316378 | 6.139981313  | 0.049346001 |
| ENSG00000237473.1 | 186.5514089 | 0           | #NAME?       | 0.048313639 |
| RPUSD2            | 1.117074305 | 213.0565523 | 7.575367457  | 0.049383258 |
| RETSAT            | 7.819520132 | 269.453875  | 5.106814449  | 0.049410042 |
| MED10             | 511.6200315 | 62.66369185 | -3.029371077 | 0.04950794  |
| SNX16             | 317.2491025 | 17.00871636 | -4.221269912 | 0.049630257 |
| C17orf64          | 452.4150934 | 47.44536669 | -3.253307949 | 0.049646657 |
| LOC105370489      | 185.4343346 | 0           | #NAME?       | 0.049668156 |
| GRIN2D            | 5.585371523 | 253.3403542 | 5.503279842  | 0.04973115  |
| MX1               | 5.585371523 | 253.3403542 | 5.503279842  | 0.04973115  |

|                   |             |             |              |             |
|-------------------|-------------|-------------|--------------|-------------|
| CHKA              | 2.234148609 | 225.5892907 | 6.657829618  | 0.04983165  |
| ENSG00000270194.1 | 2.234148609 | 225.5892907 | 6.657829618  | 0.04983165  |
| SPATA31D1         | 2.234148609 | 225.5892907 | 6.657829618  | 0.04983165  |
| HABP4             | 869.083809  | 156.6592296 | -2.471865539 | 0.049890946 |
| NDUFA11           | 14.52196596 | 306.1568945 | 4.397962491  | 0.049905337 |
