# Supplementary material
Source: publisher figshare collection journal article supplement (https://diabetesjournals.figshare.com/articles/dataset/_/23552883)
Supplement: Supplementary file 6 [file 1]

**Supplementary Table S5 Differentially expressed miRNAs in the sequencing of cells overexpressing lncRNA LOC100132249**

| <b>rna_id</b>       | <b>log2fc_nc-vs-oe</b> | <b>fdr_nc-vs-oe</b> | <b>pvalue_nc-vs-oe</b> |
|---------------------|------------------------|---------------------|------------------------|
| hsa-miR-576-3p      | -0.791332408           | 0.106824578         | 0.0224662              |
| hsa-miR-140-5p      | 0.044965982            | 1.11E-06            | 1.12E-07               |
| hsa-miR-2682-5p     | 0.121204751            | 0.764472316         | 0.598968               |
| hsa-miR-133a-3p     | -1.957965463           | 3.62E-13            | 2.69E-14               |
| hsa-miR-487a-3p     | -2.160672629           | 0.863119987         | 0.444314               |
| hsa-miR-4743-3p     | 0.028095346            | 0.967990109         | 0.914102               |
| hsa-miR-30d-5p      | -0.22645835            | 6.27E-23            | 3.62E-24               |
| novel-hsa-miR285-5p | -3.8242294             | 0                   | 0                      |
| hsa-miR-5088-5p     | 0.613057847            | 0.916932725         | 0.797826               |
| hsa-miR-6827-3p     | 4.773730476            | 0.108690854         | 0.0230828              |
| novel-hsa-miR56-5p  | 0.028095346            | 0.967286116         | 0.914102               |
| hsa-miR-7108-5p     | 1.028095346            | 0.815227941         | 0.55245                |
| novel-hsa-miR218-3p | 0.028095346            | 0.970084033         | 0.892744               |
| novel-hsa-miR250-3p | -1.556867154           | 0.685035391         | 0.307442               |
| novel-hsa-miR225-3p | 3.188767975            | 0.704859246         | 0.295508               |
| hsa-miR-381-3p      | 1.350023441            | 0.761032722         | 0.37084                |
| hsa-miR-6786-3p     | 0.028095346            | 0.966583147         | 0.914102               |
| novel-hsa-miR220-3p | 1.028095346            | 0.859220861         | 0.71336                |
| hsa-miR-374b-3p     | 0.202124746            | 0.952965344         | 0.942486               |
| hsa-miR-6738-5p     | 2.188767975            | 0.819037523         | 0.558972               |
| hsa-miR-17-5p       | 0.606214579            | 1.31E-19            | 8.28E-21               |
| novel-hsa-miR244-5p | 3.188767975            | 0.70370563          | 0.295508               |
| hsa-miR-6895-3p     | -2.293832748           | 0.345746548         | 0.0914862              |
| hsa-miR-6873-5p     | -2.160672629           | 0.86196916          | 0.444314               |
| hsa-miR-3200-5p     | 0.028095346            | 0.965881198         | 0.914102               |
| hsa-miR-4730        | 1.028095346            | 0.758209787         | 0.36738                |
| hsa-miR-3681-5p     | -2.160672629           | 0.860821398         | 0.444314               |
| hsa-miR-548s        | 1.028095346            | 0.858510174         | 0.71336                |
| hsa-miR-6876-5p     | 2.188767975            | 0.818213541         | 0.558972               |
| hsa-miR-302b-3p     | -0.261411271           | 0.75217431          | 0.483356               |
| hsa-miR-6891-5p     | -2.160672629           | 0.859676689         | 0.444314               |
| hsa-miR-92b-3p      | 1.379288036            | 0                   | 0                      |
| hsa-miR-3940-5p     | 0.028095346            | 0.857881019         | 0.711658               |
| hsa-miR-3140-5p     | 0.028095346            | 0.965180269         | 0.914102               |
| hsa-miR-3680-5p     | -0.971904654           | 0.821660803         | 0.541562               |
| hsa-miR-103a-2-5p   | 0.4139865              | 0.686372851         | 0.322666               |

|                     |              |             |            |
|---------------------|--------------|-------------|------------|
| hsa-miR-6832-5p     | 2.188767975  | 0.817391216 | 0.558972   |
| hsa-miR-6877-5p     | 0.028095346  | 0.964480355 | 0.914102   |
| hsa-miR-3187-3p     | -0.078275957 | 0.042536717 | 0.00818576 |
| hsa-miR-3155a       | -2.160672629 | 0.85853502  | 0.444314   |
| hsa-miR-3682-5p     | 1.028095346  | 0.857800661 | 0.71336    |
| novel-hsa-miR312-3p | 1.028095346  | 0.85709232  | 0.71336    |
| hsa-miR-4695-3p     | 1.613057847  | 0.722311355 | 0.450762   |
| hsa-miR-450a-2-3p   | 2.028095346  | 0.683677373 | 0.27723    |
| novel-hsa-miR286-3p | 0.634277801  | 2.31E-38    | 1.05E-39   |
| hsa-miR-6793-3p     | 3.188767975  | 0.702555784 | 0.295508   |
| hsa-miR-6515-3p     | 2.188767975  | 0.816570542 | 0.558972   |
| hsa-miR-1276        | 1.028095346  | 0.856385149 | 0.71336    |
| novel-hsa-miR118-3p | -0.186029459 | 0.219781666 | 0.0533216  |
| novel-hsa-miR59-5p  | 2.188767975  | 0.815751515 | 0.558972   |
| hsa-miR-2276-3p     | 0.028095346  | 0.918902245 | 0.810276   |
| hsa-miR-615-5p      | -1.971904654 | 0.185622727 | 0.0421     |
| hsa-miR-3120-3p     | -3.160672629 | 0.621855122 | 0.209422   |
| hsa-miR-4769-5p     | -2.160672629 | 0.857396379 | 0.444314   |
| hsa-miR-6780b-5p    | 3.188767975  | 0.70140969  | 0.295508   |
| novel-hsa-miR209-3p | -1.971904654 | 6.52E-11    | 5.33E-12   |
| hsa-miR-1306-5p     | 0.087904742  | 0.736697231 | 0.469866   |
| hsa-miR-3677-3p     | -3.745635129 | 0.363594554 | 0.0987078  |
| novel-hsa-miR123-3p | 0.028095346  | 0.963781457 | 0.914102   |
| novel-hsa-miR122-5p | 0.028095346  | 0.962386693 | 0.914102   |
| hsa-miR-138-1-3p    | 0.028095346  | 0.96308357  | 0.914102   |
| hsa-miR-4641        | -1.556867154 | 0.683987936 | 0.307442   |
| hsa-miR-489-3p      | 0.259420893  | 0.960881564 | 0.882294   |
| hsa-miR-23a-3p      | 0.365006352  | 3.72E-57    | 1.33E-58   |
| novel-hsa-miR159-3p | 1.028095346  | 0.855679143 | 0.71336    |
| hsa-miR-675-3p      | -2.160672629 | 0.855128135 | 0.444314   |
| hsa-miR-6796-5p     | -2.160672629 | 0.856260755 | 0.444314   |
| hsa-miR-2110        | -0.03509848  | 0.736087845 | 0.352108   |
| hsa-miR-1237-5p     | 2.188767975  | 0.814934128 | 0.558972   |
| hsa-miR-483-3p      | 0.487526965  | 0.830224218 | 0.681868   |
| hsa-miR-4659a-3p    | -0.234939059 | 0.797259279 | 0.395068   |
| hsa-miR-193a-5p     | 0.411099018  | 0.526510172 | 0.168628   |
| hsa-miR-146a-5p     | 0.186016774  | 0.711661346 | 0.337978   |
| hsa-miR-1289        | -3.160672629 | 0.620588615 | 0.209422   |
| hsa-miR-8485        | -0.141829655 | 0.775778426 | 0.63022    |
| hsa-miR-425-3p      | 0.287338173  | 0.686125268 | 0.281052   |
| hsa-miR-2278        | 0.632957405  | 0.354964738 | 0.1014882  |

|                     |              |             |             |
|---------------------|--------------|-------------|-------------|
| hsa-miR-4474-3p     | -0.164549732 | 0.77678011  | 0.629966    |
| hsa-let-7a-3p       | -0.31364123  | 1.95E-10    | 1.62E-11    |
| hsa-miR-5002-5p     | 2.188767975  | 0.814118378 | 0.558972    |
| hsa-miR-19b-1-5p    | -0.129857013 | 0.287149967 | 0.0728236   |
| hsa-miR-10527-5p    | 0.443132846  | 0.815103227 | 0.666648    |
| hsa-miR-4488        | 0.610880194  | 0.005116889 | 0.000812372 |
| hsa-miR-3691-5p     | 2.188767975  | 0.812491768 | 0.558972    |
| hsa-miR-6759-3p     | 2.188767975  | 0.81330426  | 0.558972    |
| hsa-miR-500a-5p     | -0.212912753 | 0.00958092  | 0.001580358 |
| novel-hsa-miR77-5p  | 0.028095346  | 0.961690824 | 0.914102    |
| hsa-miR-3688-5p     | 2.188767975  | 0.811680898 | 0.558972    |
| hsa-miR-744-5p      | -0.11000693  | 9.59E-13    | 7.19E-14    |
| hsa-miR-532-3p      | -0.564026946 | 9.23E-28    | 4.63E-29    |
| hsa-miR-4747-5p     | 0.028095346  | 0.948675705 | 0.845658    |
| hsa-miR-26a-2-3p    | -0.082935966 | 0.268262137 | 0.067296    |
| hsa-miR-6813-3p     | 1.613057847  | 0.721516733 | 0.450762    |
| hsa-miR-3605-3p     | -0.130894177 | 0.360937    | 0.096746    |
| hsa-miR-4677-3p     | -1.194297075 | 0.188487361 | 0.0430088   |
| hsa-miR-34a-3p      | 0.028095346  | 0.961581367 | 0.875006    |
| hsa-miR-758-3p      | -3.745635129 | 0.362676386 | 0.0987078   |
| hsa-miR-3150b-3p    | -1.556867154 | 0.682943679 | 0.307442    |
| hsa-miR-6732-5p     | -4.482600724 | 0.105649381 | 0.0219286   |
| hsa-miR-6858-5p     | 1.613057847  | 0.629789358 | 0.242826    |
| hsa-miR-548ar-3p    | -2.160672629 | 0.853998507 | 0.444314    |
| hsa-miR-202-5p      | 2.613057847  | 0.349626988 | 0.0992412   |
| hsa-miR-378d        | -1.556867154 | 0.034171075 | 0.00641148  |
| hsa-miR-6765-5p     | 2.188767975  | 0.810871645 | 0.558972    |
| hsa-miR-101-5p      | -1.293832748 | 0.588927298 | 0.22019     |
| hsa-miR-6511a-5p    | -4.160672629 | 0.199097921 | 0.0465246   |
| novel-hsa-miR315-5p | 0.513522174  | 0.854942598 | 0.732724    |
| hsa-miR-1267        | 2.188767975  | 0.810064004 | 0.558972    |
| hsa-miR-4668-5p     | -2.160672629 | 0.85287186  | 0.444314    |
| hsa-miR-548bc       | -2.556867154 | 0.203134724 | 0.0485848   |
| hsa-miR-6748-3p     | -4.160672629 | 0.198514056 | 0.0465246   |
| hsa-miR-1248        | 3.188767975  | 0.700267329 | 0.295508    |
| hsa-miR-4463        | -2.160672629 | 0.851748182 | 0.444314    |
| novel-hsa-miR38-3p  | 0.443132846  | 0.957092285 | 0.855134    |
| hsa-miR-548b-5p     | 1.028095346  | 0.814401976 | 0.55245     |
| novel-hsa-miR309-3p | 3.773730476  | 0.516606348 | 0.1562246   |
| hsa-miR-4763-5p     | -2.160672629 | 0.850627461 | 0.444314    |
| novel-hsa-miR143-3p | -0.971904654 | 0.820804906 | 0.541562    |

|                     |              |             |             |
|---------------------|--------------|-------------|-------------|
| hsa-miR-579-5p      | 0.071164068  | 0.80573878  | 0.544912    |
| hsa-miR-1306-3p     | 2.835450268  | 0.238607704 | 0.058217    |
| novel-hsa-miR84-3p  | -1.129445931 | 0.025021685 | 0.00452282  |
| hsa-miR-205-5p      | -1.569467191 | 2.36E-11    | 1.88E-12    |
| hsa-miR-496         | -2.160672629 | 0.849509685 | 0.444314    |
| hsa-miR-320c        | 0.338198006  | 0.669978102 | 0.298382    |
| novel-hsa-miR118-5p | 0.876092253  | 0.827028318 | 0.418914    |
| hsa-miR-6767-3p     | -2.160672629 | 0.848394843 | 0.444314    |
| hsa-miR-4722-5p     | 1.028095346  | 0.8549743   | 0.71336     |
| hsa-miR-424-3p      | -0.024215156 | 3.40E-07    | 3.32E-08    |
| hsa-miR-627-5p      | 0.443132846  | 0.780994627 | 0.626406    |
| novel-hsa-miR22-3p  | -4.059367495 | 0.000208994 | 2.77E-05    |
| hsa-miR-4799-5p     | 0.028095346  | 0.939521698 | 0.832978    |
| hsa-miR-3074-5p     | -0.635283885 | 0           | 0           |
| hsa-miR-210-5p      | 0.317601964  | 0.871139737 | 0.750198    |
| hsa-miR-3173-5p     | -0.052824649 | 0.571140335 | 0.210792    |
| novel-hsa-miR54-3p  | -2.160672629 | 0.847282923 | 0.444314    |
| novel-hsa-miR291-5p | -3.779259576 | 5.07E-10    | 4.28E-11    |
| hsa-miR-4748        | 0.443132846  | 0.956356626 | 0.855134    |
| hsa-miR-223-3p      | 1.115558188  | 0.001249631 | 0.000181218 |
| novel-hsa-miR265-3p | 0.121204751  | 0.959310382 | 0.880192    |
| hsa-miR-142-5p      | 0.390665426  | 0.916706747 | 0.80771     |
| hsa-miR-6803-3p     | -0.609334574 | 0.584064946 | 0.1922798   |
| novel-hsa-miR255-5p | -0.877556353 | 5.66E-39    | 2.53E-40    |
| hsa-miR-664b-5p     | 1.028095346  | 0.854270617 | 0.71336     |
| novel-hsa-miR91-3p  | 0.208667592  | 0.978179441 | 0.974818    |
| hsa-miR-486-3p      | -0.668123905 | 0.000171116 | 2.26E-05    |
| hsa-miR-4525        | 0.028095346  | 0.96936009  | 0.892744    |
| hsa-miR-6511a-3p    | 0.641072223  | 0.69598207  | 0.32814     |
| hsa-miR-449a        | 0.393327226  | 0.203080262 | 0.0484322   |
| hsa-miR-5583-5p     | 1.613057847  | 0.720723857 | 0.450762    |
| hsa-miR-4765        | -3.160672629 | 0.619327256 | 0.209422    |
| hsa-miR-3619-5p     | 0.028095346  | 0.911023693 | 0.79018     |
| hsa-miR-5001-5p     | 1.198020348  | 0.651319105 | 0.26008     |
| hsa-miR-766-3p      | 0.456938645  | 0.01224696  | 0.00207062  |
| hsa-miR-487b-3p     | 1.835450268  | 0.51997295  | 0.1558132   |
| hsa-miR-3908        | -2.160672629 | 0.846173914 | 0.444314    |
| novel-hsa-miR165-5p | 0.121204751  | 0.940658062 | 0.837218    |
| hsa-miR-330-3p      | 0.531419378  | 0.271665106 | 0.0687098   |
| hsa-miR-186-3p      | -1.556867154 | 0.238914261 | 0.0586202   |
| novel-hsa-miR282-3p | 0.443132846  | 0.955622097 | 0.855134    |

|                     |              |             |             |
|---------------------|--------------|-------------|-------------|
| hsa-miR-92b-5p      | 0.083413115  | 0.710923092 | 0.338116    |
| novel-hsa-miR116-5p | 1.184214548  | 0.003389137 | 0.000521764 |
| novel-hsa-miR299-5p | -1.556867154 | 0.681902607 | 0.307442    |
| hsa-miR-6769b-3p    | 2.188767975  | 0.80925797  | 0.558972    |
| hsa-miR-6829-3p     | -2.160672629 | 0.845067804 | 0.444314    |
| hsa-miR-7106-3p     | 2.188767975  | 0.808453539 | 0.558972    |
| hsa-miR-6766-3p     | 0.028095346  | 0.95249198  | 0.859534    |
| hsa-miR-10a-3p      | 0.560969336  | 0.5589364   | 0.1813182   |
| hsa-miR-5584-5p     | -2.160672629 | 0.843964582 | 0.444314    |
| novel-hsa-miR92-3p  | -1.556867154 | 0.680864703 | 0.307442    |
| hsa-miR-1-3p        | -2.011433018 | 8.15E-43    | 3.47E-44    |
| hsa-miR-200a-5p     | 0.038774115  | 0.028539934 | 0.00525684  |
| hsa-miR-3202        | 3.188767975  | 0.699128683 | 0.295508    |
| hsa-miR-943         | -0.971904654 | 0.819950791 | 0.541562    |
| hsa-let-7b-3p       | -0.971904654 | 0.819098451 | 0.541562    |
| novel-hsa-miR243-5p | 4.193002273  | 1.16E-57    | 4.06E-59    |
| hsa-miR-10399-3p    | -1.431336272 | 0.196766947 | 0.0455742   |
| hsa-miR-3124-5p     | -0.556867154 | 0.75576561  | 0.583316    |
| hsa-miR-103a-1-5p   | 4.51069607   | 0.190778027 | 0.0436626   |
| hsa-miR-4731-5p     | -1.293832748 | 0.292289838 | 0.074328    |
| novel-hsa-miR167-3p | 0.028095346  | 0.960995961 | 0.914102    |
| hsa-miR-4750-5p     | 2.188767975  | 0.807650705 | 0.558972    |
| hsa-miR-191-3p      | 0.136498939  | 0.759824802 | 0.59376     |
| hsa-let-7g-3p       | -2.500283626 | 1.62E-12    | 1.24E-13    |
| novel-hsa-miR31-5p  | 2.188767975  | 0.806849464 | 0.558972    |
| hsa-miR-3928-3p     | -0.386942153 | 0.593218927 | 0.1961088   |
| hsa-miR-769-5p      | 0.354370697  | 0.116463832 | 0.0248136   |
| hsa-miR-6799-5p     | -0.556867154 | 0.755093221 | 0.583316    |
| hsa-miR-20a-3p      | 0.028095346  | 0.9517671   | 0.859534    |
| hsa-miR-19a-3p      | -0.477432687 | 0.00100557  | 0.000143752 |
| hsa-miR-6787-3p     | -2.160672629 | 0.842864237 | 0.444314    |
| hsa-miR-1915-3p     | 0.269103446  | 0.969607752 | 0.912964    |
| hsa-miR-6741-3p     | 0.613057847  | 0.833454657 | 0.685094    |
| novel-hsa-miR183-5p | -2.160672629 | 0.841766758 | 0.444314    |
| hsa-miR-544b        | 2.350023441  | 0.525248715 | 0.167141    |
| hsa-miR-32-5p       | -0.018381636 | 3.11E-12    | 2.40E-13    |
| hsa-miR-5706        | -2.160672629 | 0.840672133 | 0.444314    |
| hsa-miR-1301-3p     | 1.658861537  | 1.54E-06    | 1.57E-07    |
| hsa-miR-3677-5p     | -3.745635129 | 0.361762844 | 0.0987078   |
| hsa-miR-370-3p      | -2.160672629 | 0.839580351 | 0.444314    |
| hsa-miR-7112-3p     | 0.028095346  | 0.960302101 | 0.914102    |

|                     |              |             |             |
|---------------------|--------------|-------------|-------------|
| hsa-miR-574-3p      | 0.151399601  | 0.811125878 | 0.409744    |
| hsa-miR-938         | 2.188767975  | 0.806049812 | 0.558972    |
| hsa-miR-3074-3p     | 0.250487768  | 0.96870973  | 0.91345     |
| hsa-miR-6716-3p     | -3.745635129 | 0.360853892 | 0.0987078   |
| hsa-miR-23a-5p      | 0.033468519  | 0.595363106 | 0.197636    |
| hsa-miR-342-3p      | 0.45672579   | 0.005293629 | 0.00084407  |
| hsa-miR-372-3p      | -2.160672629 | 0.838491401 | 0.444314    |
| hsa-miR-5587-5p     | 0.028095346  | 0.959609242 | 0.914102    |
| hsa-miR-584-5p      | 0.105117767  | 0.675134847 | 0.272838    |
| hsa-miR-4479        | -0.234939059 | 0.796155042 | 0.395068    |
| hsa-miR-4326        | -0.056296841 | 0.647924635 | 0.256498    |
| hsa-let-7b-5p       | 0.335452819  | 2.08E-51    | 8.01E-53    |
| novel-hsa-miR270-5p | -2.160672629 | 0.837405272 | 0.444314    |
| hsa-miR-542-5p      | 0.080023138  | 0.672383509 | 0.271264    |
| hsa-miR-19b-3p      | 0.068178526  | 0.001871371 | 0.000279098 |
| hsa-miR-6751-5p     | 3.773730476  | 0.515434905 | 0.1562246   |
| hsa-miR-10396a-3p   | -2.160672629 | 0.836321953 | 0.444314    |
| hsa-miR-6807-5p     | 2.188767975  | 0.805251743 | 0.558972    |
| hsa-miR-675-5p      | -2.726792156 | 3.76E-05    | 4.55E-06    |
| hsa-miR-199a-5p     | -2.420365154 | 7.21E-21    | 4.41E-22    |
| hsa-miR-6735-5p     | -0.708870248 | 0.80603789  | 0.401634    |
| novel-hsa-miR175-3p | 3.773730476  | 0.514268762 | 0.1562246   |
| hsa-miR-30a-5p      | -0.360958469 | 2.27E-84    | 7.03E-86    |
| hsa-miR-4455        | -3.160672629 | 0.618071014 | 0.209422    |
| novel-hsa-miR245-5p | 1.143572564  | 0.573148342 | 0.1875042   |
| novel-hsa-miR201-5p | -1.556867154 | 0.679829954 | 0.307442    |
| hsa-miR-3682-3p     | 0.028095346  | 0.958917383 | 0.914102    |
| hsa-miR-3189-3p     | -1.141829655 | 0.008628468 | 0.001411392 |
| hsa-miR-6880-5p     | 2.188767975  | 0.804455252 | 0.558972    |
| hsa-miR-6828-5p     | -3.160672629 | 0.616819858 | 0.209422    |
| hsa-miR-4689        | -0.971904654 | 0.818247882 | 0.541562    |
| novel-hsa-miR144-3p | -2.160672629 | 0.835241434 | 0.444314    |
| hsa-miR-939-3p      | -3.160672629 | 0.615573758 | 0.209422    |
| hsa-miR-136-3p      | 1.028095346  | 0.853568092 | 0.71336     |
| hsa-miR-548ad-5p    | -2.160672629 | 0.834163703 | 0.444314    |
| hsa-miR-339-3p      | -0.151139832 | 8.86E-05    | 1.11E-05    |
| hsa-miR-519a-3p     | -0.271464935 | 0.584360744 | 0.221294    |
| hsa-miR-5003-3p     | 2.188767975  | 0.803660336 | 0.558972    |
| hsa-miR-1246        | 0.622658617  | 3.52E-08    | 3.22E-09    |
| novel-hsa-miR170-5p | -3.160672629 | 0.614332681 | 0.209422    |
| hsa-miR-576-5p      | 0.529654533  | 7.48E-07    | 7.41E-08    |

|                     |              |             |             |
|---------------------|--------------|-------------|-------------|
| hsa-miR-129-1-3p    | 2.188767975  | 0.802866989 | 0.558972    |
| hsa-miR-3145-5p     | -3.160672629 | 0.6130966   | 0.209422    |
| hsa-miR-3150a-5p    | -0.186029459 | 0.70422     | 0.33396     |
| hsa-miR-4664-5p     | -0.897904072 | 0.204960446 | 0.0493032   |
| hsa-miR-4436b-3p    | -2.160672629 | 0.83308875  | 0.444314    |
| hsa-miR-6791-3p     | -2.293832748 | 0.0644305   | 0.0128861   |
| hsa-miR-582-5p      | -0.141829655 | 0.775122654 | 0.63022     |
| hsa-miR-338-5p      | -2.556867154 | 0.202552676 | 0.0485848   |
| hsa-miR-543         | 0.028095346  | 0.968637226 | 0.892744    |
| hsa-miR-766-5p      | 2.067623711  | 0.000889386 | 0.00012592  |
| novel-hsa-miR117-5p | -2.160672629 | 0.832016564 | 0.444314    |
| novel-hsa-miR119-3p | 0.028095346  | 0.910302375 | 0.79018     |
| hsa-miR-548ae-5p    | -0.041167316 | 0.751461771 | 0.361528    |
| hsa-miR-151b        | 0.667045494  | 0.000165612 | 2.14E-05    |
| novel-hsa-miR199-3p | -3.431336272 | 0.010616317 | 0.001765738 |
| novel-hsa-miR207-5p | 2.188767975  | 0.802075207 | 0.558972    |
| hsa-miR-200c-3p     | -0.437568226 | 0.040727334 | 0.00778158  |
| novel-hsa-miR15-3p  | 3.188767975  | 0.697993734 | 0.295508    |
| hsa-miR-96-5p       | 0.685962668  | 6.31E-181   | 1.21E-182   |
| hsa-miR-887-3p      | 0.202929148  | 0.963159619 | 0.955878    |
| hsa-miR-618         | -1.293832748 | 0.587846697 | 0.22019     |
| hsa-miR-491-5p      | 0.092225684  | 0.916849906 | 0.807206    |
| hsa-miR-548al       | 0.028095346  | 0.95822652  | 0.914102    |
| hsa-miR-4685-3p     | 0.613057847  | 0.80604333  | 0.54401     |
| hsa-miR-6765-3p     | -2.160672629 | 0.830947134 | 0.444314    |
| hsa-miR-511-3p      | 0.028095346  | 0.957536652 | 0.914102    |
| hsa-miR-4286        | -3.341138463 | 1.65E-26    | 8.49E-28    |
| hsa-miR-17-3p       | 0.496648355  | 0.468872735 | 0.1385672   |
| hsa-miR-627-3p      | 0.028095346  | 0.96791544  | 0.892744    |
| hsa-miR-4652-3p     | 4.188767975  | 0.322168987 | 0.0825904   |
| hsa-miR-196b-3p     | -0.971904654 | 0.300371452 | 0.076796    |
| novel-hsa-miR237-3p | 0.467517004  | 0.363598947 | 0.0982092   |
| novel-hsa-miR232-5p | -0.971904654 | 0.817399077 | 0.541562    |
| hsa-miR-10523-5p    | -0.779259576 | 0.6946267   | 0.286444    |
| hsa-miR-3200-3p     | -0.84066012  | 0.026668827 | 0.00483888  |
| hsa-miR-320e        | 0.028095346  | 0.956847777 | 0.914102    |
| hsa-miR-641         | 0.480607551  | 0.743413281 | 0.356634    |
| novel-hsa-miR65-3p  | 1.028095346  | 0.852866721 | 0.71336     |
| hsa-miR-1285-3p     | -0.437568226 | 0.040581358 | 0.00778158  |
| hsa-miR-4804-3p     | 3.188767975  | 0.696862464 | 0.295508    |
| novel-hsa-miR114-5p | 3.188767975  | 0.695734854 | 0.295508    |

|                     |              |             |             |
|---------------------|--------------|-------------|-------------|
| novel-hsa-miR110-3p | -0.474404994 | 0.003034055 | 0.000462928 |
| hsa-miR-30a-3p      | 0.179539283  | 0.794356329 | 0.64695     |
| hsa-miR-548d-3p     | -1.431336272 | 0.196184796 | 0.0455742   |
| novel-hsa-miR150-3p | -2.160672629 | 0.829880449 | 0.444314    |
| hsa-miR-5006-5p     | 2.188767975  | 0.801284985 | 0.558972    |
| hsa-miR-6733-3p     | 2.188767975  | 0.800496319 | 0.558972    |
| hsa-miR-4717-5p     | 0.028095346  | 0.956159892 | 0.914102    |
| hsa-miR-548az-5p    | 2.188767975  | 0.799709204 | 0.558972    |
| hsa-miR-10400-3p    | 2.188767975  | 0.798923635 | 0.558972    |
| hsa-miR-3194-5p     | -3.160672629 | 0.611865482 | 0.209422    |
| hsa-miR-20b-5p      | 2.188767975  | 0.798139607 | 0.558972    |
| hsa-miR-4706        | -3.160672629 | 0.610639299 | 0.209422    |
| hsa-miR-1260a       | -3.726792156 | 1.79E-06    | 1.84E-07    |
| hsa-miR-5699-5p     | 0.028095346  | 0.955472996 | 0.914102    |
| novel-hsa-miR80-5p  | -0.749512232 | 0.001463279 | 0.000214212 |
| hsa-miR-503-3p      | 0.187034487  | 0.963161601 | 0.955218    |
| hsa-miR-1307-3p     | 0.27633275   | 0.164665583 | 0.0366678   |
| hsa-miR-376a-3p     | -0.386942153 | 0.724240043 | 0.459432    |
| hsa-miR-92a-1-5p    | 0.458971439  | 0.032988769 | 0.0061443   |
| hsa-miR-5000-5p     | 0.443132846  | 0.954888695 | 0.855134    |
| hsa-miR-548h-3p     | 2.188767975  | 0.797357118 | 0.558972    |
| hsa-miR-3065-5p     | -0.556867154 | 0.754422027 | 0.583316    |
| hsa-miR-4457        | 3.773730476  | 0.513107885 | 0.1562246   |
| novel-hsa-miR235-3p | 3.378194114  | 5.10E-120   | 1.26E-121   |
| hsa-miR-125b-2-3p   | -3.745635129 | 0.359949496 | 0.0987078   |
| hsa-miR-3680-3p     | 2.188767975  | 0.796576161 | 0.558972    |
| hsa-miR-2682-3p     | -0.512473035 | 0.571203792 | 0.211208    |
| hsa-miR-1273c       | 0.613057847  | 0.683837218 | 0.321004    |
| hsa-miR-5690        | 4.188767975  | 0.321307572 | 0.0825904   |
| hsa-miR-183-3p      | -0.219832167 | 0.800419046 | 0.397734    |
| hsa-miR-194-3p      | -1.779259576 | 0.292141253 | 0.074491    |
| hsa-miR-378f        | 0.028095346  | 0.909322711 | 0.799954    |
| hsa-miR-4640-3p     | -3.160672629 | 0.60941802  | 0.209422    |
| hsa-miR-106b-5p     | 0.766562966  | 6.70E-26    | 3.50E-27    |
| novel-hsa-miR181-3p | -2.293832748 | 2.88E-23    | 1.62E-24    |
| hsa-miR-4712-5p     | -3.160672629 | 0.608201617 | 0.209422    |
| hsa-miR-4680-5p     | 2.188767975  | 0.795796732 | 0.558972    |
| hsa-miR-1914-3p     | 1.613057847  | 0.719932722 | 0.450762    |
| hsa-miR-379-5p      | -0.386942153 | 0.702974231 | 0.292302    |
| hsa-miR-3126-5p     | 0.902564464  | 0.732971974 | 0.34961     |
| hsa-miR-26b-5p      | 0.059518924  | 0.000150993 | 1.93E-05    |



|                     |              |             |             |
|---------------------|--------------|-------------|-------------|
| novel-hsa-miR71-3p  | 0.13501055   | 0.961672517 | 0.874428    |
| hsa-miR-149-3p      | 2.188767975  | 0.795018827 | 0.558972    |
| hsa-miR-4758-5p     | 2.613057847  | 0.348782478 | 0.0992412   |
| hsa-miR-573         | -1.087381871 | 0.268166521 | 0.0669034   |
| hsa-miR-1236-3p     | 3.188767975  | 0.694610889 | 0.295508    |
| hsa-miR-6812-3p     | -1.556867154 | 0.446390552 | 0.1294686   |
| hsa-let-7g-5p       | 0.433457853  | 2.47E-113   | 6.79E-115   |
| hsa-miR-660-3p      | 0.350023441  | 0.958324443 | 0.898388    |
| hsa-miR-765         | 0.028095346  | 0.954787085 | 0.914102    |
| hsa-miR-12135       | 2.188767975  | 0.794242441 | 0.558972    |
| hsa-miR-628-3p      | 2.835450268  | 0.002991269 | 0.000454344 |
| novel-hsa-miR122-3p | 0.680172043  | 0.778014773 | 0.506378    |
| hsa-miR-4511        | 2.028095346  | 0.682520558 | 0.27723     |
| hsa-miR-3131        | -2.160672629 | 0.8288165   | 0.444314    |
| hsa-miR-532-5p      | 0.165941528  | 0.145467263 | 0.0319928   |
| hsa-miR-296-5p      | -1.293832748 | 0.022559859 | 0.00404682  |
| novel-hsa-miR69-3p  | -2.160672629 | 0.827755275 | 0.444314    |
| hsa-miR-197-5p      | -0.356568504 | 0.322636077 | 0.0840406   |
| hsa-miR-34b-3p      | -2.160672629 | 0.826696765 | 0.444314    |
| hsa-miR-378a-5p     | 0.078262133  | 0.17624722  | 0.0396102   |
| hsa-miR-6846-5p     | -2.160672629 | 0.825640958 | 0.444314    |
| novel-hsa-miR45-3p  | 2.487526965  | 0.108000682 | 0.022862    |
| hsa-miR-20a-5p      | 0.348008035  | 1.63E-06    | 1.67E-07    |
| hsa-miR-106a-5p     | -0.708870248 | 0.463915335 | 0.1361456   |
| hsa-miR-5586-5p     | -2.160672629 | 0.824587844 | 0.444314    |
| hsa-miR-4654        | -0.293832748 | 0.778510737 | 0.617458    |
| hsa-miR-21-3p       | -0.586405669 | 1.98E-178   | 3.95E-180   |
| hsa-miR-188-3p      | -3.293832748 | 4.80E-17    | 3.27E-18    |
| hsa-miR-550b-2-5p   | -2.160672629 | 0.823537414 | 0.444314    |
| hsa-miR-6782-5p     | 3.188767975  | 0.693490548 | 0.295508    |
| novel-hsa-miR100-5p | -1.092047017 | 7.07E-25    | 3.79E-26    |
| hsa-miR-2355-3p     | 0.27602286   | 0.958273471 | 0.878582    |
| hsa-miR-148b-3p     | 0.36689726   | 0.364475273 | 0.0981954   |
| novel-hsa-miR307-3p | 2.188767975  | 0.793467571 | 0.558972    |
| hsa-miR-590-3p      | 0.137170262  | 0.106925912 | 0.022561    |
| novel-hsa-miR302-5p | 0.528629066  | 0.00071425  | 0.000100142 |
| hsa-miR-548u        | -0.609334574 | 0.582848144 | 0.1922798   |
| hsa-miR-100-5p      | 0.077493681  | 9.15E-49    | 3.59E-50    |
| novel-hsa-miR83-3p  | 0.765060941  | 0.78090149  | 0.626868    |
| hsa-miR-5697        | 2.188767975  | 0.792694211 | 0.558972    |
| hsa-miR-6801-5p     | 3.188767975  | 0.692373816 | 0.295508    |

|                     |              |             |             |
|---------------------|--------------|-------------|-------------|
| hsa-miR-320a-3p     | 0.618900415  | 7.41E-120   | 1.88E-121   |
| hsa-miR-3661        | 0.671951536  | 0.663363772 | 0.308202    |
| hsa-miR-4791        | -0.386942153 | 0.723456234 | 0.459432    |
| hsa-miR-4638-3p     | 0.028095346  | 0.967194728 | 0.892744    |
| hsa-miR-214-5p      | -2.672344372 | 0.011973997 | 0.00201624  |
| hsa-miR-6808-3p     | 2.188767975  | 0.791922356 | 0.558972    |
| hsa-miR-6500-3p     | -0.457331481 | 0.7214696   | 0.445774    |
| hsa-miR-1296-5p     | -1.361047829 | 1.16E-214   | 1.75E-216   |
| hsa-miR-6743-3p     | 1.028095346  | 0.852166502 | 0.71336     |
| hsa-miR-6892-5p     | 2.188767975  | 0.791152004 | 0.558972    |
| hsa-miR-301a-3p     | 0.236648257  | 0.768362269 | 0.377052    |
| hsa-miR-328-3p      | 0.176028776  | 0.955978832 | 0.894218    |
| novel-hsa-miR49-3p  | 4.188767975  | 0.320450752 | 0.0825904   |
| hsa-miR-1291        | 2.188767975  | 0.790383149 | 0.558972    |
| hsa-miR-3912-3p     | -0.234939059 | 0.753461401 | 0.487808    |
| hsa-miR-152-3p      | -0.846373771 | 1.26E-05    | 1.42E-06    |
| hsa-miR-4484        | 0.211541488  | 0.959643685 | 0.95041     |
| hsa-miR-643         | 0.584488695  | 0.801106119 | 0.398626    |
| novel-hsa-miR123-5p | 0.028095346  | 0.966475089 | 0.892744    |
| hsa-miR-4676-3p     | 0.028095346  | 0.954102159 | 0.914102    |
| hsa-miR-361-5p      | 0.369658609  | 4.98E-05    | 6.09E-06    |
| hsa-miR-1908-5p     | -0.367389355 | 0.004943344 | 0.000781422 |
| hsa-miR-2277-3p     | -1.649976559 | 0.001009585 | 0.000145019 |
| novel-hsa-miR98-5p  | -2.160672629 | 0.822489656 | 0.444314    |
| novel-hsa-miR308-5p | 1.028095346  | 0.851467432 | 0.71336     |
| hsa-miR-6871-5p     | 1.613057847  | 0.719143322 | 0.450762    |
| hsa-miR-656-3p      | 2.188767975  | 0.789615786 | 0.558972    |
| hsa-miR-6893-5p     | 2.188767975  | 0.788849913 | 0.558972    |
| hsa-miR-4717-3p     | -5.160672629 | 0.013471423 | 0.00229616  |
| hsa-miR-375-3p      | -0.386942153 | 0.701814208 | 0.292302    |
| novel-hsa-miR187-5p | -2.160672629 | 0.820402119 | 0.444314    |
| hsa-miR-518a-5p     | -2.160672629 | 0.821444562 | 0.444314    |
| hsa-miR-6849-3p     | 3.188767975  | 0.691260675 | 0.295508    |
| hsa-miR-3615        | -0.175207702 | 3.27E-23    | 1.87E-24    |
| hsa-miR-6514-5p     | 0.028095346  | 0.953418215 | 0.914102    |
| novel-hsa-miR191-5p | -0.708870248 | 0.804927645 | 0.401634    |
| hsa-miR-4508        | -3.160672629 | 0.60699006  | 0.209422    |
| hsa-miR-708-3p      | -2.160672629 | 0.819362319 | 0.444314    |
| hsa-miR-4521        | -0.106405689 | 4.73E-10    | 3.97E-11    |
| novel-hsa-miR73-3p  | -1.109408177 | 0.337890509 | 0.088943    |
| hsa-let-7i-5p       | 0.260725881  | 6.99E-19    | 4.47E-20    |

|                     |              |             |             |
|---------------------|--------------|-------------|-------------|
| hsa-miR-33a-5p      | 0.058172752  | 2.77E-11    | 2.23E-12    |
| novel-hsa-miR31-3p  | 1.143572564  | 0.571946774 | 0.1875042   |
| hsa-miR-154-5p      | -0.971904654 | 0.816552031 | 0.541562    |
| hsa-miR-449b-3p     | 0.028095346  | 0.960855645 | 0.875006    |
| hsa-miR-3617-3p     | -2.160672629 | 0.818325152 | 0.444314    |
| novel-hsa-miR273-3p | 0.028095346  | 0.952735251 | 0.914102    |
| hsa-miR-216b-5p     | -2.160672629 | 0.817290607 | 0.444314    |
| hsa-miR-1226-3p     | 0.685207633  | 0.545070185 | 0.1764454   |
| hsa-miR-127-3p      | -0.234939059 | 0.752662397 | 0.487808    |
| novel-hsa-miR41-3p  | 1.613057847  | 0.718355652 | 0.450762    |
| hsa-miR-23b-3p      | 0.588619958  | 1.36E-24    | 7.40E-26    |
| hsa-miR-3613-5p     | 0.388429703  | 4.42E-09    | 3.98E-10    |
| hsa-miR-429         | -0.002711599 | 1.44E-46    | 5.85E-48    |
| hsa-miR-584-3p      | -1.466669345 | 0.003328309 | 0.000510112 |
| hsa-miR-3614-5p     | 2.188767975  | 0.788085523 | 0.558972    |
| hsa-miR-4655-5p     | -3.160672629 | 0.60578332  | 0.209422    |
| hsa-miR-6779-3p     | 0.028095346  | 0.952053264 | 0.914102    |
| hsa-miR-4762-5p     | -2.160672629 | 0.816258674 | 0.444314    |
| novel-hsa-miR240-3p | -2.160672629 | 0.815229344 | 0.444314    |
| hsa-miR-200b-5p     | 0.175673694  | 0.900629976 | 0.779308    |
| novel-hsa-miR183-3p | -2.160672629 | 0.814202607 | 0.444314    |
| hsa-miR-6801-3p     | -3.160672629 | 0.604581369 | 0.209422    |
| hsa-miR-3157-3p     | -4.745635129 | 0.053328227 | 0.01033578  |
| hsa-miR-98-3p       | 0.028095346  | 0.96575652  | 0.892744    |
| hsa-miR-548d-5p     | 0.443132846  | 0.837873484 | 0.714064    |
| hsa-miR-324-5p      | 0.130699832  | 0.799686283 | 0.52488     |
| hsa-miR-26a-1-3p    | 0.237942514  | 0.875323363 | 0.755004    |
| hsa-miR-6855-5p     | 0.028095346  | 0.965039019 | 0.892744    |
| hsa-miR-1294        | 0.847523101  | 0.463677636 | 0.1367132   |
| hsa-miR-6501-5p     | -2.160672629 | 0.813178453 | 0.444314    |
| novel-hsa-miR293-5p | 0.197024355  | 0.976484741 | 0.972458    |
| novel-hsa-miR236-3p | 0.028095346  | 0.93879395  | 0.832978    |
| hsa-miR-3157-5p     | 0.443132846  | 0.808095141 | 0.53151     |
| hsa-miR-154-3p      | 2.188767975  | 0.787322614 | 0.558972    |
| hsa-miR-1270        | 0.390665426  | 0.735070187 | 0.351116    |
| novel-hsa-miR260-5p | -1.046198436 | 8.44E-44    | 3.54E-45    |
| hsa-miR-769-3p      | 0.274850933  | 0.668296894 | 0.269156    |
| hsa-miR-143-3p      | -1.709990185 | 0           | 0           |
| hsa-miR-4665-5p     | 1.028095346  | 0.850769508 | 0.71336     |
| hsa-miR-302a-3p     | 0.350023441  | 0.957622374 | 0.898388    |
| hsa-miR-10b-5p      | 0.156621487  | 0.221059712 | 0.0537836   |

|                     |              |             |           |
|---------------------|--------------|-------------|-----------|
| hsa-miR-4677-5p     | 1.028095346  | 0.263965939 | 0.065674  |
| hsa-miR-148b-5p     | 0.028095346  | 0.951372253 | 0.914102  |
| hsa-miR-7705        | -0.167824864 | 0.537848489 | 0.173738  |
| hsa-miR-6755-5p     | -2.160672629 | 0.812156872 | 0.444314  |
| hsa-miR-6847-3p     | -3.160672629 | 0.603384178 | 0.209422  |
| novel-hsa-miR6-3p   | -0.293832748 | 0.746993871 | 0.47746   |
| hsa-miR-1843        | 0.41511847   | 0.837789484 | 0.692112  |
| hsa-miR-153-3p      | -0.156329225 | 0.804783724 | 0.405434  |
| hsa-miR-4454        | -0.068119969 | 0.748309304 | 0.480358  |
| hsa-miR-1343-5p     | -1.243206675 | 1.96E-05    | 2.30E-06  |
| hsa-miR-7110-3p     | 2.188767975  | 0.78656118  | 0.558972  |
| hsa-miR-423-3p      | 0.202983941  | 0.698835654 | 0.330446  |
| hsa-miR-331-5p      | 0.015039194  | 0.74322736  | 0.356034  |
| hsa-miR-3960        | -2.160672629 | 0.811137854 | 0.444314  |
| hsa-miR-190a-3p     | 0.028095346  | 0.964322584 | 0.892744  |
| novel-hsa-miR203-3p | -2.971904654 | 0.065655261 | 0.0132213 |
| hsa-miR-31-5p       | 0.688086662  | 1.35E-205   | 2.32E-207 |
| hsa-miR-935         | -0.034270535 | 4.40E-06    | 4.63E-07  |
| hsa-miR-6742-5p     | 2.188767975  | 0.785801217 | 0.558972  |
| hsa-miR-150-3p      | 2.188767975  | 0.785042722 | 0.558972  |
| hsa-miR-548aq-5p    | 0.028095346  | 0.843697145 | 0.698732  |
| hsa-miR-3130-5p     | 0.281851939  | 0.872162273 | 0.751678  |
| hsa-miR-126-5p      | -0.19801249  | 9.16E-08    | 8.50E-09  |
| hsa-miR-497-3p      | 0.028095346  | 0.950692216 | 0.914102  |
| hsa-miR-3138        | 1.028095346  | 0.850072727 | 0.71336   |
| hsa-miR-6818-5p     | 0.613057847  | 0.916209021 | 0.797826  |
| hsa-miR-676-3p      | 1.613057847  | 0.628668737 | 0.242826  |
| novel-hsa-miR149-5p | -0.360946944 | 0.241308517 | 0.0597052 |
| hsa-miR-3142        | -2.160672629 | 0.810121391 | 0.444314  |
| hsa-miR-3181        | -1.556867154 | 0.678798346 | 0.307442  |
| hsa-miR-6721-5p     | 2.188767975  | 0.784285689 | 0.558972  |
| novel-hsa-miR16-3p  | -2.160672629 | 0.809107472 | 0.444314  |
| hsa-miR-376b-3p     | -0.350416277 | 0.757997781 | 0.370924  |
| hsa-miR-139-3p      | -0.474404994 | 0.58727337  | 0.219168  |
| novel-hsa-miR257-5p | -3.160672629 | 0.602191719 | 0.209422  |
| hsa-miR-491-3p      | -0.386942153 | 0.700658007 | 0.292302  |
| hsa-miR-548e-5p     | -0.971904654 | 0.649958839 | 0.25775   |
| hsa-miR-6882-3p     | -2.160672629 | 0.808096088 | 0.444314  |
| hsa-miR-4642        | -2.160672629 | 0.806080885 | 0.444314  |
| hsa-miR-10397-3p    | -2.160672629 | 0.807087228 | 0.444314  |
| hsa-miR-422a        | 2.188767975  | 0.783530116 | 0.558972  |

|                     |              |             |           |
|---------------------|--------------|-------------|-----------|
| hsa-miR-376c-3p     | 0.172485256  | 0.962572302 | 0.953972  |
| novel-hsa-miR250-5p | -2.160672629 | 0.805077049 | 0.444314  |
| hsa-miR-4524a-3p    | 0.613057847  | 0.915486459 | 0.797826  |
| hsa-miR-30b-5p      | 0.100255048  | 0.00067525  | 9.42E-05  |
| hsa-miR-9-3p        | -0.556867154 | 0.840152392 | 0.427294  |
| hsa-miR-4758-3p     | 1.350023441  | 0.759960845 | 0.37084   |
| hsa-miR-362-3p      | 0.508088288  | 0.66181348  | 0.309756  |
| hsa-miR-6858-3p     | -0.556867154 | 0.753752025 | 0.583316  |
| novel-hsa-miR210-3p | -2.160672629 | 0.804075709 | 0.444314  |
| novel-hsa-miR62-3p  | 0.028095346  | 0.95001315  | 0.914102  |
| hsa-miR-3684        | -0.293832748 | 0.777836701 | 0.617458  |
| hsa-miR-1257        | -3.160672629 | 0.601003964 | 0.209422  |
| hsa-miR-4429        | 3.188767975  | 0.690151108 | 0.295508  |
| hsa-miR-3911        | 0.765060941  | 0.780233482 | 0.626868  |
| novel-hsa-miR266-5p | 0.291129752  | 0.944858977 | 0.93317   |
| hsa-miR-146b-5p     | -0.261411271 | 0.324851724 | 0.084841  |
| novel-hsa-miR200-3p | -0.556867154 | 0.753083212 | 0.583316  |
| hsa-miR-378a-3p     | 0.092454877  | 4.23E-15    | 3.05E-16  |
| hsa-miR-133b        | 2.188767975  | 0.782775996 | 0.558972  |
| hsa-miR-548ah-3p    | -0.971904654 | 0.755580256 | 0.364548  |
| hsa-miR-3191-3p     | -2.160672629 | 0.803076857 | 0.444314  |
| hsa-miR-4728-3p     | 0.327655628  | 0.924792121 | 0.818012  |
| novel-hsa-miR90-3p  | 0.350023441  | 0.956921332 | 0.898388  |
| hsa-miR-4664-3p     | -0.556867154 | 0.839018583 | 0.427294  |
| novel-hsa-miR239-3p | -2.160672629 | 0.802080484 | 0.444314  |
| hsa-miR-15b-5p      | 0.175647476  | 0.826885569 | 0.41941   |
| hsa-miR-548q        | 2.188767975  | 0.782023327 | 0.558972  |
| novel-hsa-miR228-3p | 2.188767975  | 0.781272104 | 0.558972  |
| hsa-miR-6726-5p     | 2.188767975  | 0.780522322 | 0.558972  |
| hsa-miR-4485-3p     | -0.109408177 | 0.776957628 | 0.627974  |
| hsa-miR-6797-3p     | 3.188767975  | 0.689045096 | 0.295508  |
| hsa-miR-1914-5p     | -0.50241937  | 0.663370564 | 0.266716  |
| hsa-miR-3648        | -1.81990156  | 0.016001522 | 0.0027604 |
| hsa-miR-330-5p      | -0.217017151 | 0.679833311 | 0.275204  |
| hsa-miR-139-5p      | -0.487158182 | 1.06E-06    | 1.05E-07  |
| hsa-miR-10401-3p    | -0.779259576 | 0.241305468 | 0.0595386 |
| novel-hsa-miR308-3p | -0.971904654 | 0.815706739 | 0.541562  |
| hsa-miR-941         | 0.259204985  | 0.704468882 | 0.294376  |
| hsa-miR-301a-5p     | -0.044054439 | 0.72480462  | 0.459292  |
| hsa-miR-181b-3p     | -0.971904654 | 0.814863195 | 0.541562  |
| hsa-miR-4795-5p     | 3.188767975  | 0.687942624 | 0.295508  |

|                     |              |             |             |
|---------------------|--------------|-------------|-------------|
| hsa-miR-937-5p      | 0.143572564  | 0.93396795  | 0.920488    |
| hsa-miR-10399-5p    | 0.864596614  | 0.523598442 | 0.166256    |
| novel-hsa-miR184-3p | -0.43487663  | 0.002872448 | 0.000434322 |
| hsa-miR-128-3p      | -0.062174842 | 1.25E-17    | 8.35E-19    |
| novel-hsa-miR97-5p  | -2.160672629 | 0.80108658  | 0.444314    |
| hsa-miR-6829-5p     | 0.028095346  | 0.949335054 | 0.914102    |
| novel-hsa-miR199-5p | -0.697708668 | 1.86E-171   | 3.84E-173   |
| hsa-miR-548ap-3p    | 1.443132846  | 0.569442481 | 0.209774    |
| novel-hsa-miR301-3p | -3.160672629 | 0.599820886 | 0.209422    |
| hsa-miR-340-3p      | 0.416867191  | 0.643089686 | 0.253258    |
| hsa-miR-3175        | 0.028095346  | 0.948657924 | 0.914102    |
| hsa-miR-3158-5p     | -4.160672629 | 0.197933605 | 0.0465246   |
| hsa-miR-126-3p      | 0.098269727  | 2.11E-07    | 2.00E-08    |
| hsa-miR-451a        | 1.631934821  | 0           | 0           |
| hsa-miR-1237-3p     | 0.086989035  | 0.911365385 | 0.78985     |
| hsa-miR-3194-3p     | 0.613057847  | 0.914765035 | 0.797826    |
| hsa-miR-4517        | 0.077004947  | 0.805449756 | 0.657092    |
| novel-hsa-miR217-3p | -0.779259576 | 0.693470915 | 0.286444    |
| hsa-miR-155-3p      | 0.613057847  | 0.720934834 | 0.448912    |
| hsa-miR-4661-3p     | 2.188767975  | 0.779773979 | 0.558972    |
| hsa-miR-2277-5p     | 0.613057847  | 0.805223347 | 0.54401     |
| hsa-miR-1268a       | 0.458612941  | 5.04E-09    | 4.57E-10    |
| novel-hsa-miR76-3p  | 2.188767975  | 0.779027069 | 0.558972    |
| hsa-miR-3125        | -3.160672629 | 0.598642456 | 0.209422    |
| hsa-miR-4498        | -2.160672629 | 0.800095136 | 0.444314    |
| hsa-miR-103a-3p     | 0.028095346  | 0.869303765 | 0.747422    |
| hsa-miR-6838-5p     | -3.160672629 | 0.597468647 | 0.209422    |
| hsa-let-7i-3p       | -6.400563923 | 0           | 0           |
| hsa-miR-501-5p      | 0.458729701  | 0.635799388 | 0.24995     |
| hsa-miR-342-5p      | 0.270170134  | 0.839854037 | 0.694972    |
| hsa-miR-199b-5p     | 0.613057847  | 0.767482742 | 0.606074    |
| hsa-miR-6758-5p     | -1.556867154 | 0.677769864 | 0.307442    |
| hsa-miR-7114-5p     | -0.556867154 | 0.752415585 | 0.583316    |
| novel-hsa-miR231-3p | 0.028095346  | 0.947981761 | 0.914102    |
| hsa-miR-6821-5p     | -0.971904654 | 0.754505462 | 0.364548    |
| hsa-miR-6879-3p     | -2.160672629 | 0.799106143 | 0.444314    |
| hsa-miR-1229-3p     | 1.291129752  | 0.520428414 | 0.155592    |
| hsa-miR-1284        | -0.173538515 | 0.805468068 | 0.404118    |
| hsa-miR-642a-3p     | 2.188767975  | 0.778281589 | 0.558972    |
| hsa-miR-1229-5p     | -0.971904654 | 0.814021395 | 0.541562    |
| novel-hsa-miR182-5p | 2.188767975  | 0.777537533 | 0.558972    |

|                     |              |             |           |
|---------------------|--------------|-------------|-----------|
| hsa-miR-450a-1-3p   | -0.971904654 | 0.572387811 | 0.186862  |
| novel-hsa-miR111-3p | -3.160672629 | 0.596299432 | 0.209422  |
| hsa-miR-556-5p      | -0.261411271 | 0.751370705 | 0.483356  |
| hsa-miR-4781-5p     | -2.160672629 | 0.798119593 | 0.444314  |
| hsa-miR-2276-5p     | -2.160672629 | 0.797135475 | 0.444314  |
| hsa-miR-5094        | -4.160672629 | 0.197356539 | 0.0465246 |
| hsa-miR-145-3p      | 2.188767975  | 0.7767949   | 0.558972  |
| hsa-miR-2116-5p     | 0.220740424  | 0.988841232 | 0.987482  |
| hsa-miR-4741        | -0.62398135  | 0.630449678 | 0.242214  |
| novel-hsa-miR51-3p  | 0.028095346  | 0.94730656  | 0.914102  |
| hsa-miR-1915-5p     | -0.078819857 | 0.752188564 | 0.48595   |
| novel-hsa-miR121-5p | -0.487546094 | 0.000166629 | 2.19E-05  |
| hsa-miR-548t-5p     | 2.835450268  | 0.237937458 | 0.058217  |
| hsa-miR-6789-5p     | 0.765060941  | 0.779566615 | 0.626868  |
| hsa-miR-29c-3p      | -0.504726706 | 1.18E-25    | 6.22E-27  |
| hsa-miR-6840-3p     | -2.160672629 | 0.796153781 | 0.444314  |
| novel-hsa-miR140-5p | 0.028095346  | 0.963607211 | 0.892744  |
| hsa-miR-483-5p      | -0.971904654 | 0.118324863 | 0.0255354 |
| hsa-let-7f-5p       | 0.306307031  | 2.04E-45    | 8.42E-47  |
| hsa-miR-6842-5p     | 2.188767975  | 0.776053683 | 0.558972  |
| hsa-miR-4745-5p     | 0.443132846  | 0.954156419 | 0.855134  |
| hsa-miR-6511b-5p    | 0.028095346  | 0.951043323 | 0.859534  |
| hsa-miR-144-3p      | -2.087381871 | 1.25E-05    | 1.40E-06  |
| hsa-let-7d-5p       | 0.491921276  | 8.27E-143   | 1.93E-144 |
| hsa-miR-4713-5p     | -0.556867154 | 0.510407056 | 0.1617166 |
| hsa-miR-499a-5p     | -0.31704014  | 0.106153938 | 0.0222522 |
| hsa-miR-10526-3p    | 0.028095346  | 0.822211482 | 0.674722  |
| hsa-miR-374a-3p     | -0.032786896 | 0.333275961 | 0.0872702 |
| hsa-miR-30e-5p      | -0.472204757 | 6.87E-06    | 7.46E-07  |
| novel-hsa-miR25-3p  | -3.160672629 | 0.595134785 | 0.209422  |
| novel-hsa-miR166-3p | 0.443132846  | 0.953425264 | 0.855134  |
| hsa-miR-141-3p      | -2.022530727 | 0.000346649 | 4.67E-05  |
| hsa-miR-1271-5p     | 1.028095346  | 0.849377087 | 0.71336   |
| novel-hsa-miR104-5p | -1.459569953 | 1.28E-11    | 1.01E-12  |
| hsa-miR-186-5p      | -0.13381148  | 1.49E-10    | 1.23E-11  |
| hsa-miR-339-5p      | -0.159967082 | 7.60E-12    | 5.95E-13  |
| hsa-miR-18a-3p      | 0.277454815  | 0.813222432 | 0.411362  |
| hsa-miR-486-5p      | 0.985026625  | 3.04E-18    | 1.96E-19  |
| hsa-miR-378b        | 0.691060359  | 0.574869282 | 0.1888574 |
| hsa-miR-548j-5p     | -0.164549732 | 0.502996868 | 0.1493434 |
| hsa-miR-548ay-5p    | 0.454910013  | 0.692050033 | 0.287284  |

|                     |              |             |             |
|---------------------|--------------|-------------|-------------|
| novel-hsa-miR129-5p | 2.188767975  | 0.77531388  | 0.558972    |
| hsa-miR-1273h-5p    | -2.160672629 | 0.795174502 | 0.444314    |
| hsa-miR-218-5p      | 0.131917184  | 0.348906175 | 0.0987968   |
| hsa-miR-663b        | -0.585436306 | 0.000164905 | 2.14E-05    |
| hsa-miR-369-5p      | 2.188767975  | 0.774575486 | 0.558972    |
| hsa-miR-6820-3p     | 1.028095346  | 0.813577682 | 0.55245     |
| novel-hsa-miR217-5p | -2.160672629 | 0.794197629 | 0.444314    |
| hsa-miR-135a-5p     | -0.739731211 | 0.009119903 | 0.001498046 |
| hsa-miR-6785-5p     | -2.160672629 | 0.793223153 | 0.444314    |
| hsa-miR-4745-3p     | 2.188767975  | 0.773838497 | 0.558972    |
| hsa-miR-93-5p       | 0.244243187  | 0.000434172 | 6.03E-05    |
| hsa-miR-548k        | 0.235928336  | 0.759860942 | 0.593266    |
| hsa-miR-4725-5p     | 2.188767975  | 0.773102909 | 0.558972    |
| hsa-miR-6736-5p     | 3.188767975  | 0.686843674 | 0.295508    |
| hsa-miR-6862-5p     | 2.188767975  | 0.772368718 | 0.558972    |
| hsa-miR-99a-3p      | 1.028095346  | 0.812755056 | 0.55245     |
| novel-hsa-miR275-3p | -0.556867154 | 0.83788783  | 0.427294    |
| hsa-miR-6511b-3p    | 0.40660697   | 0.865261728 | 0.743352    |
| novel-hsa-miR165-3p | 0.028095346  | 0.94663232  | 0.914102    |
| novel-hsa-miR145-3p | -0.436667527 | 5.82E-06    | 6.28E-07    |
| hsa-miR-130b-5p     | 0.210265767  | 0.926671327 | 0.820948    |
| hsa-miR-196a-1-3p   | 0.028095346  | 0.93806733  | 0.832978    |
| novel-hsa-miR134-5p | 0.028095346  | 0.94595904  | 0.914102    |
| hsa-miR-6799-3p     | -1.556867154 | 0.676744493 | 0.307442    |
| novel-hsa-miR263-3p | 0.613057847  | 0.914044748 | 0.797826    |
| hsa-miR-3064-3p     | -2.160672629 | 0.792251066 | 0.444314    |
| novel-hsa-miR208-3p | 0.291129752  | 0.93834007  | 0.83451     |
| novel-hsa-miR67-3p  | 2.188767975  | 0.77163592  | 0.558972    |
| hsa-miR-6509-3p     | 0.198020348  | 0.991013109 | 0.990332    |
| hsa-miR-939-5p      | -0.556867154 | 0.836760121 | 0.427294    |
| novel-hsa-miR193-5p | -2.160672629 | 0.791281359 | 0.444314    |
| hsa-miR-4772-3p     | 2.188767975  | 0.770904512 | 0.558972    |
| hsa-miR-9985        | 0.613057847  | 0.913325594 | 0.797826    |
| hsa-miR-3193        | 1.028095346  | 0.848682584 | 0.71336     |
| hsa-miR-10396a-5p   | -3.160672629 | 0.593974678 | 0.209422    |
| hsa-miR-6880-3p     | -2.160672629 | 0.790314022 | 0.444314    |
| hsa-miR-144-5p      | -2.160672629 | 0.789349048 | 0.444314    |
| hsa-miR-6734-3p     | 2.188767975  | 0.770174489 | 0.558972    |
| hsa-miR-122-5p      | 0.943206449  | 0.059581146 | 0.01187528  |
| hsa-miR-206         | -5.620104247 | 0.001634726 | 0.000240434 |
| hsa-miR-548f-5p     | 0.443132846  | 0.95269523  | 0.855134    |



|                     |              |             |             |
|---------------------|--------------|-------------|-------------|
| hsa-miR-6810-3p     | 0.028095346  | 0.945286716 | 0.914102    |
| hsa-miR-24-1-5p     | 0.229729208  | 0.954775042 | 0.944932    |
| hsa-miR-5584-3p     | -0.556867154 | 0.751749141 | 0.583316    |
| hsa-miR-5010-5p     | -0.109408177 | 0.776297511 | 0.627974    |
| hsa-miR-6125        | 2.188767975  | 0.769445847 | 0.558972    |
| novel-hsa-miR223-5p | 0.028095346  | 0.861828303 | 0.73981     |
| novel-hsa-miR148-3p | -0.174048391 | 0.019480159 | 0.00340066  |
| hsa-miR-652-5p      | 0.934985942  | 0.634986462 | 0.249194    |
| hsa-miR-1972        | -1.556867154 | 0.675722221 | 0.307442    |
| hsa-miR-340-5p      | 0.342211114  | 3.74E-06    | 3.90E-07    |
| hsa-miR-3183        | -4.745635129 | 0.053139788 | 0.01033578  |
| hsa-miR-485-3p      | 0.028095346  | 0.944615348 | 0.914102    |
| hsa-miR-25-3p       | 0.694582724  | 3.33E-35    | 1.55E-36    |
| novel-hsa-miR214-5p | -5.160672629 | 0.01341732  | 0.00229616  |
| novel-hsa-miR200-5p | -0.373267216 | 0.012699499 | 0.00215586  |
| hsa-miR-6812-5p     | 1.613057847  | 0.717569705 | 0.450762    |
| novel-hsa-miR272-3p | 3.188767975  | 0.68574823  | 0.295508    |
| hsa-miR-6728-5p     | 0.028095346  | 0.943944933 | 0.914102    |
| hsa-miR-556-3p      | 0.443132846  | 0.951966312 | 0.855134    |
| hsa-miR-548o-5p     | -3.160672629 | 0.592819086 | 0.209422    |
| hsa-miR-147b-5p     | -0.261411271 | 0.750568815 | 0.483356    |
| hsa-miR-3688-3p     | -1.386942153 | 0.364975028 | 0.0980792   |
| hsa-miR-548aq-3p    | -0.123907747 | 0.76341666  | 0.496352    |
| hsa-miR-5191        | 2.188767975  | 0.767992691 | 0.558972    |
| hsa-miR-4738-3p     | 2.188767975  | 0.768718582 | 0.558972    |
| novel-hsa-miR33-3p  | -0.164549732 | 0.764113651 | 0.49628     |
| hsa-miR-423-5p      | -0.924598939 | 0.002168631 | 0.000324922 |
| hsa-miR-455-3p      | 0.07932067   | 0.676073585 | 0.302026    |
| hsa-miR-425-5p      | 0.059722102  | 5.49E-06    | 5.84E-07    |
| novel-hsa-miR93-5p  | 0.028095346  | 0.962892898 | 0.892744    |
| hsa-miR-181c-5p     | 0.066163387  | 0.789118031 | 0.388322    |
| novel-hsa-miR292-5p | -2.160672629 | 0.788386427 | 0.444314    |
| novel-hsa-miR211-3p | -0.386942153 | 0.722674119 | 0.459432    |
| hsa-miR-9901        | -2.846373771 | 1.57E-16    | 1.09E-17    |
| hsa-miR-1272        | -0.234939059 | 0.781948554 | 0.624484    |
| hsa-miR-338-3p      | -1.556867154 | 0.065694147 | 0.01318398  |
| hsa-miR-200a-3p     | 0.211636665  | 0.78133876  | 0.62346     |
| novel-hsa-miR99-3p  | -1.7374394   | 0.00038511  | 5.27E-05    |
| hsa-miR-944         | 2.188767975  | 0.76726817  | 0.558972    |
| hsa-miR-3184-3p     | -0.472177988 | 1.07E-185   | 1.99E-187   |
| hsa-miR-219a-5p     | 1.028095346  | 0.847989216 | 0.71336     |

|                     |              |             |             |
|---------------------|--------------|-------------|-------------|
| hsa-miR-548e-3p     | -0.708870248 | 0.462831421 | 0.1361456   |
| hsa-miR-29b-1-5p    | 0.174194389  | 0.776814331 | 0.618782    |
| hsa-miR-548ac       | -2.160672629 | 0.787426151 | 0.444314    |
| hsa-miR-4436b-5p    | 0.028095346  | 0.947944831 | 0.845658    |
| hsa-miR-219a-1-3p   | 0.250487768  | 0.968004188 | 0.91345     |
| hsa-miR-3121-5p     | 0.028095346  | 0.950320646 | 0.859534    |
| hsa-miR-1343-3p     | 0.395466412  | 0.66607966  | 0.296188    |
| novel-hsa-miR117-3p | -0.194297075 | 0.776011528 | 0.628276    |
| hsa-miR-140-3p      | -0.57158866  | 1.78E-05    | 2.05E-06    |
| hsa-miR-3679-3p     | -3.160672629 | 0.591667981 | 0.209422    |
| hsa-miR-137-5p      | -0.180347516 | 0.042714865 | 0.0082494   |
| hsa-miR-625-5p      | 0.154808281  | 0.854577785 | 0.731824    |
| hsa-miR-10395-3p    | 2.188767975  | 0.766545014 | 0.558972    |
| hsa-miR-203b-5p     | -2.160672629 | 0.786468212 | 0.444314    |
| hsa-miR-369-3p      | 0.028095346  | 0.960131018 | 0.875006    |
| hsa-miR-410-3p      | -2.160672629 | 0.7855126   | 0.444314    |
| hsa-miR-132-3p      | 1.049156962  | 0.022039109 | 0.00393826  |
| novel-hsa-miR189-5p | -1.005782663 | 6.99E-53    | 2.64E-54    |
| novel-hsa-miR187-3p | -2.160672629 | 0.784559308 | 0.444314    |
| hsa-miR-3164        | -0.334474733 | 0.737215696 | 0.46969     |
| hsa-miR-365b-3p     | 4.9996389    | 1.12E-56    | 4.09E-58    |
| hsa-miR-216a-5p     | -1.971904654 | 0.057759039 | 0.01139302  |
| hsa-miR-1537-5p     | 0.198020348  | 0.990332    | 0.990332    |
| hsa-miR-3190-5p     | 2.188767975  | 0.76582322  | 0.558972    |
| hsa-miR-6734-5p     | -0.971904654 | 0.813181331 | 0.541562    |
| hsa-miR-1908-3p     | -3.293832748 | 0.000164656 | 2.12E-05    |
| hsa-miR-155-5p      | 0.221115296  | 0.828814465 | 0.420958    |
| hsa-miR-6514-3p     | -0.386942153 | 0.771004755 | 0.605146    |
| novel-hsa-miR161-5p | 3.773730476  | 0.511952236 | 0.1562246   |
| hsa-miR-3144-5p     | -2.160672629 | 0.783608327 | 0.444314    |
| hsa-miR-6738-3p     | -2.160672629 | 0.782659649 | 0.444314    |
| hsa-let-7d-3p       | 0.278850328  | 0.001116082 | 0.000161084 |
| novel-hsa-miR66-5p  | 2.188767975  | 0.765102785 | 0.558972    |
| novel-hsa-miR114-3p | 0.028095346  | 0.962179644 | 0.892744    |
| hsa-miR-130a-3p     | 0.37609442   | 7.01E-06    | 7.66E-07    |
| hsa-miR-7854-3p     | -2.160672629 | 0.780769167 | 0.444314    |
| hsa-miR-5088-3p     | -2.160672629 | 0.781713265 | 0.444314    |
| hsa-miR-1275        | -1.601955044 | 3.95E-101   | 1.17E-102   |
| hsa-miR-500a-3p     | 0.48410999   | 0.059639796 | 0.01184598  |
| hsa-miR-142-3p      | 0.443132846  | 0.893980684 | 0.77294     |
| hsa-miR-22-3p       | 0.075992262  | 1.85E-72    | 5.85E-74    |

|                     |              |             |            |
|---------------------|--------------|-------------|------------|
| hsa-miR-411-5p      | -0.261411271 | 0.749768635 | 0.483356   |
| hsa-miR-570-5p      | 3.773730476  | 0.510801782 | 0.1562246  |
| hsa-miR-1537-3p     | -0.014250944 | 0.401946367 | 0.115197   |
| hsa-miR-5187-5p     | -3.745635129 | 0.359049623 | 0.0987078  |
| hsa-miR-9898        | 1.028095346  | 0.757135836 | 0.36738    |
| hsa-miR-4646-3p     | 0.028095346  | 0.943275468 | 0.914102   |
| hsa-miR-5090        | -0.708870248 | 0.803820454 | 0.401634   |
| hsa-miR-365a-3p     | -11.32306396 | 3.47E-186   | 6.20E-188  |
| hsa-miR-27a-3p      | -0.433413909 | 0           | 0          |
| hsa-miR-3179        | -0.556867154 | 0.751083876 | 0.583316   |
| hsa-miR-671-5p      | -0.023827311 | 0.000372317 | 5.07E-05   |
| hsa-miR-744-3p      | 0.308203266  | 0.815179352 | 0.66615    |
| novel-hsa-miR289-5p | 0.04027006   | 0.628743789 | 0.246312   |
| hsa-miR-1285-5p     | 0.327655628  | 0.924074115 | 0.818012   |
| hsa-miR-539-5p      | 2.188767975  | 0.764383703 | 0.558972   |
| hsa-miR-138-2-3p    | -1.556867154 | 0.674703032 | 0.307442   |
| novel-hsa-miR72-5p  | -0.419363631 | 0.44554381  | 0.1289168  |
| hsa-miR-33b-5p      | -6.24813547  | 2.24E-05    | 2.64E-06   |
| novel-hsa-miR274-3p | -1.857262088 | 6.53E-16    | 4.67E-17   |
| hsa-miR-3916        | 1.028095346  | 0.84729698  | 0.71336    |
| hsa-miR-502-3p      | 0.427644338  | 0.071237388 | 0.01454124 |
| hsa-miR-3170        | 1.028095346  | 0.846605873 | 0.71336    |
| hsa-miR-4754        | 0.028095346  | 0.942606953 | 0.914102   |
| hsa-miR-3064-5p     | 1.613057847  | 0.627552096 | 0.242826   |
| hsa-miR-490-5p      | -1.708870248 | 0.013476676 | 0.00231558 |
| hsa-miR-34c-5p      | -2.293832748 | 0.344850832 | 0.0914862  |
| hsa-miR-522-3p      | -0.656747517 | 1.68E-09    | 1.46E-10   |
| hsa-miR-4306        | 0.37601865   | 0.815586091 | 0.668164   |
| hsa-miR-3918        | 3.773730476  | 0.509656487 | 0.1562246  |
| hsa-miR-365b-5p     | -1.556867154 | 0.673686913 | 0.307442   |
| hsa-miR-4755-5p     | 1.16559887   | 0.583759781 | 0.220264   |
| hsa-miR-3619-3p     | 0.835450268  | 0.779526994 | 0.507898   |
| novel-hsa-miR269-5p | 1.028095346  | 0.845915892 | 0.71336    |
| hsa-miR-192-3p      | 0.028095346  | 0.949599066 | 0.859534   |
| hsa-miR-3127-5p     | -0.252012573 | 0.79183525  | 0.391836   |
| hsa-miR-185-5p      | 0.064810585  | 0.020503837 | 0.00362164 |
| hsa-miR-5698        | 2.188767975  | 0.763665972 | 0.558972   |
| hsa-miR-2114-5p     | 2.188767975  | 0.762949587 | 0.558972   |
| hsa-miR-4477b       | -3.160672629 | 0.590521337 | 0.209422   |
| hsa-miR-222-5p      | -0.293832748 | 0.746191515 | 0.47746    |
| hsa-miR-542-3p      | 0.143572564  | 0.933317101 | 0.920488   |

|                     |              |             |             |
|---------------------|--------------|-------------|-------------|
| hsa-miR-4768-5p     | 0.691060359  | 0.751317039 | 0.360942    |
| hsa-miR-6807-3p     | -2.160672629 | 0.779827346 | 0.444314    |
| hsa-miR-589-5p      | 0.053332638  | 0.607715021 | 0.202154    |
| hsa-miR-16-1-3p     | 2.188767975  | 0.762234545 | 0.558972    |
| hsa-miR-624-3p      | 0.805702925  | 0.789076086 | 0.389386    |
| hsa-miR-181c-3p     | 0.028095346  | 0.941939384 | 0.914102    |
| hsa-miR-548o-3p     | -7.114868939 | 8.26E-10    | 7.04E-11    |
| hsa-miR-6766-5p     | 2.188767975  | 0.761520843 | 0.558972    |
| hsa-miR-181a-2-3p   | 0.067662431  | 0.203456939 | 0.0483822   |
| novel-hsa-miR178-5p | 1.028095346  | 0.845227036 | 0.71336     |
| hsa-miR-335-3p      | -0.164549732 | 0.623271935 | 0.239028    |
| hsa-miR-4732-3p     | 1.350023441  | 0.212754991 | 0.0513244   |
| hsa-miR-6814-5p     | -2.160672629 | 0.778887795 | 0.444314    |
| hsa-miR-4284        | 3.773730476  | 0.508516315 | 0.1562246   |
| novel-hsa-miR208-5p | 2.613057847  | 0.347942039 | 0.0992412   |
| hsa-miR-6890-5p     | -3.160672629 | 0.58937913  | 0.209422    |
| novel-hsa-miR115-5p | -0.688550263 | 4.97E-08    | 4.58E-09    |
| hsa-miR-5581-5p     | 2.188767975  | 0.760808475 | 0.558972    |
| hsa-miR-27a-5p      | 0.131825867  | 0.337114359 | 0.088507    |
| hsa-miR-942-3p      | -0.556867154 | 4.70E-05    | 5.71E-06    |
| hsa-miR-6884-5p     | 0.028095346  | 0.94127276  | 0.914102    |
| hsa-miR-450a-5p     | -0.319827957 | 0.027560763 | 0.0050386   |
| novel-hsa-miR300-3p | 0.139126659  | 0.96258534  | 0.88452     |
| hsa-miR-3163        | -0.556867154 | 0.750419788 | 0.583316    |
| hsa-miR-4797-5p     | 2.188767975  | 0.760097439 | 0.558972    |
| hsa-miR-663a        | -0.350416277 | 0.75693467  | 0.370924    |
| hsa-miR-18a-5p      | 0.101948782  | 0.189897913 | 0.0437222   |
| hsa-miR-9-5p        | -1.672344372 | 0.00367983  | 0.000574104 |
| novel-hsa-miR125-5p | 1.613057847  | 0.626439415 | 0.242826    |
| hsa-miR-378c        | 0.835450268  | 0.778705574 | 0.507898    |
| hsa-miR-7-1-3p      | 0.144516736  | 0.722263925 | 0.450236    |
| hsa-miR-125a-5p     | -0.026247586 | 1.44E-21    | 8.74E-23    |
| novel-hsa-miR44-5p  | 1.028095346  | 0.8445393   | 0.71336     |
| novel-hsa-miR81-3p  | -0.708870248 | 0.219271807 | 0.0530472   |
| hsa-miR-378e        | -0.386942153 | 0.753117133 | 0.362842    |
| novel-hsa-miR35-5p  | -2.509671987 | 0           | 0           |
| hsa-miR-3617-5p     | 2.028095346  | 0.169173969 | 0.037788    |
| hsa-miR-374a-5p     | -0.466237034 | 2.60E-09    | 2.30E-10    |
| hsa-miR-6513-3p     | -0.971904654 | 0.812343    | 0.541562    |
| novel-hsa-miR262-5p | -2.160672629 | 0.777950505 | 0.444314    |
| hsa-miR-3662        | 0.028095346  | 0.758230626 | 0.591472    |

|                     |              |             |            |
|---------------------|--------------|-------------|------------|
| hsa-miR-28-3p       | 0.038207736  | 0.118921076 | 0.0257458  |
| hsa-miR-3140-3p     | 1.250487768  | 0.66246     | 0.309148   |
| hsa-miR-4640-5p     | 0.613057847  | 0.912607571 | 0.797826   |
| hsa-miR-3611        | 1.613057847  | 0.716785475 | 0.450762   |
| hsa-miR-181b-2-3p   | 0.188560019  | 0.983610062 | 0.981582   |
| novel-hsa-miR20-3p  | -2.160672629 | 0.777015469 | 0.444314   |
| hsa-miR-10a-5p      | 0.180802197  | 0.678078908 | 0.27729    |
| hsa-miR-29b-2-5p    | -0.556867154 | 0.835635444 | 0.427294   |
| novel-hsa-miR115-3p | -0.556867154 | 0.60687     | 0.20229    |
| hsa-miR-99a-5p      | -0.488102992 | 6.15E-140   | 1.48E-141  |
| hsa-miR-561-3p      | -0.141829655 | 0.688722671 | 0.283536   |
| hsa-miR-196a-5p     | 0.32020002   | 2.57E-09    | 2.26E-10   |
| hsa-miR-6763-5p     | -1.556867154 | 0.67267385  | 0.307442   |
| hsa-miR-6516-5p     | 2.250487768  | 0.0728456   | 0.01491958 |
| novel-hsa-miR272-5p | -0.971904654 | 0.811506395 | 0.541562   |
| hsa-miR-3146        | 0.18009844   | 0.975137383 | 0.970446   |
| hsa-miR-10396b-3p   | 3.188767975  | 0.684656274 | 0.295508   |
| hsa-miR-4667-3p     | 0.028095346  | 0.961467446 | 0.892744   |
| hsa-miR-1247-5p     | 3.188767975  | 0.68356779  | 0.295508   |
| hsa-miR-548a-5p     | 0.765060941  | 0.778900888 | 0.626868   |
| hsa-miR-1180-5p     | -4.482600724 | 0.105300703 | 0.0219286  |
| hsa-miR-4669        | -0.708870248 | 0.802716305 | 0.401634   |
| hsa-miR-4726-5p     | 1.613057847  | 0.625330673 | 0.242826   |
| hsa-miR-497-5p      | -0.232795381 | 2.96E-05    | 3.54E-06   |
| hsa-miR-101-3p      | -0.282605493 | 0.027927826 | 0.0051249  |
| novel-hsa-miR9-3p   | -0.293832748 | 0.779920699 | 0.38326    |
| hsa-miR-301b-5p     | 0.765060941  | 0.778236297 | 0.626868   |
| hsa-miR-3134        | -0.293832748 | 0.74539088  | 0.47746    |
| hsa-miR-6889-5p     | 2.188767975  | 0.759387731 | 0.558972   |
| novel-hsa-miR197-5p | 1.902564464  | 0.240576528 | 0.0591934  |
| hsa-miR-363-3p      | 0.665525267  | 0.723747797 | 0.460612   |
| hsa-miR-193b-3p     | 0.257661261  | 0.011312744 | 0.00189712 |
| novel-hsa-miR11-3p  | 0.613057847  | 0.911890676 | 0.797826   |
| hsa-miR-3620-3p     | -2.160672629 | 0.776082677 | 0.444314   |
| novel-hsa-miR281-3p | 0.598411071  | 0.580413216 | 0.21581    |
| hsa-miR-589-3p      | 0.144288364  | 0.87547211  | 0.755734   |
| hsa-miR-6861-3p     | -2.160672629 | 0.775152122 | 0.444314   |
| hsa-miR-320a-5p     | 0.805702925  | 0.787978623 | 0.389386   |
| hsa-miR-6869-5p     | -3.745635129 | 0.358154237 | 0.0987078  |
| hsa-miR-6836-3p     | -2.160672629 | 0.774223796 | 0.444314   |
| hsa-miR-548x-5p     | -2.160672629 | 0.773297691 | 0.444314   |

|                     |              |             |            |
|---------------------|--------------|-------------|------------|
| hsa-miR-6853-3p     | -2.160672629 | 0.772373799 | 0.444314   |
| hsa-miR-6888-3p     | -2.160672629 | 0.771452112 | 0.444314   |
| novel-hsa-miR89-5p  | 2.188767975  | 0.758679347 | 0.558972   |
| hsa-miR-6793-5p     | -2.160672629 | 0.770532622 | 0.444314   |
| hsa-miR-493-5p      | 2.188767975  | 0.757972283 | 0.558972   |
| novel-hsa-miR125-3p | 0.821644469  | 0.562197235 | 0.1827624  |
| novel-hsa-miR44-3p  | -2.160672629 | 0.769615321 | 0.444314   |
| novel-hsa-miR95-5p  | -1.217017151 | 6.84E-05    | 8.42E-06   |
| hsa-miR-629-5p      | 0.135675234  | 0.839247752 | 0.715812   |
| hsa-miR-4423-5p     | -0.649976559 | 0.662896283 | 0.308896   |
| hsa-miR-6776-3p     | -0.971904654 | 0.810671512 | 0.541562   |
| hsa-miR-24-3p       | 0.584028496  | 0           | 0          |
| hsa-miR-6780b-3p    | 2.188767975  | 0.757266536 | 0.558972   |
| hsa-miR-3934-5p     | 0.575583142  | 0.744602906 | 0.47542    |
| hsa-miR-6825-5p     | -2.160672629 | 0.768700202 | 0.444314   |
| hsa-miR-181d-5p     | 0.404815914  | 0.58530538  | 0.222054   |
| novel-hsa-miR83-5p  | -0.556867154 | 0.749756873 | 0.583316   |
| hsa-miR-4443        | -0.663782358 | 0.340864063 | 0.08996    |
| novel-hsa-miR296-5p | 2.188767975  | 0.756562102 | 0.558972   |
| hsa-miR-2116-3p     | -0.386942153 | 0.77033021  | 0.605146   |
| hsa-miR-6895-5p     | -2.160672629 | 0.767787257 | 0.444314   |
| hsa-miR-22-5p       | -0.087785366 | 0.09439779  | 0.01952834 |
| hsa-miR-3190-3p     | -3.160672629 | 0.588241332 | 0.209422   |
| hsa-miR-182-3p      | -0.030798343 | 0.855867229 | 0.439404   |
| hsa-miR-28-5p       | -0.038661702 | 4.61E-18    | 3.01E-19   |
| hsa-miR-625-3p      | -1.035407596 | 5.06E-12    | 3.93E-13   |
| hsa-miR-323a-3p     | 2.028095346  | 0.363057213 | 0.0983124  |
| hsa-miR-616-5p      | 0.613057847  | 0.832758371 | 0.685094   |
| hsa-miR-138-5p      | 0.276785532  | 2.91E-05    | 3.46E-06   |
| hsa-miR-3173-3p     | -2.160672629 | 0.766876477 | 0.444314   |
| hsa-miR-6767-5p     | -3.160672629 | 0.587107919 | 0.209422   |
| hsa-miR-3065-3p     | -0.234939059 | 0.781276199 | 0.624484   |
| hsa-miR-3117-3p     | 0.028095346  | 0.940607079 | 0.914102   |
| novel-hsa-miR120-5p | 0.028095346  | 0.939942339 | 0.914102   |
| hsa-miR-6505-5p     | 2.188767975  | 0.755858978 | 0.558972   |
| hsa-miR-365a-5p     | -0.088944075 | 0.611698809 | 0.232908   |
| novel-hsa-miR112-5p | -2.160672629 | 0.765967855 | 0.444314   |
| hsa-miR-129-5p      | 0.396962664  | 0.039937071 | 0.00760314 |
| novel-hsa-miR14-5p  | -0.77099196  | 1.97E-13    | 1.43E-14   |
| hsa-miR-548n        | 0.16559887   | 0.943753935 | 0.93143    |
| hsa-miR-4733-5p     | 2.188767975  | 0.755157159 | 0.558972   |

|                     |              |             |             |
|---------------------|--------------|-------------|-------------|
| hsa-miR-9903        | 0.250487768  | 0.968981668 | 0.962322    |
| hsa-miR-3136-3p     | 3.773730476  | 0.507381234 | 0.1562246   |
| hsa-miR-6805-5p     | -3.745635129 | 0.357263306 | 0.0987078   |
| novel-hsa-miR198-5p | -1.194297075 | 0.007349057 | 0.001192012 |
| hsa-miR-182-5p      | 3.003008751  | 0           | 0           |
| hsa-let-7e-3p       | 0.123108461  | 0.67993424  | 0.304218    |
| novel-hsa-miR239-5p | -0.945752366 | 1.57E-16    | 1.10E-17    |
| hsa-miR-659-5p      | -1.971904654 | 0.526982968 | 0.1695038   |
| hsa-miR-3191-5p     | 3.188767975  | 0.682482762 | 0.295508    |
| hsa-miR-6886-3p     | 3.773730476  | 0.506251209 | 0.1562246   |
| hsa-miR-3180-3p     | 1.028095346  | 0.718405847 | 0.445856    |
| hsa-miR-2467-5p     | 0.028095346  | 0.939278538 | 0.914102    |
| hsa-miR-1288-3p     | -0.457331481 | 0.720667967 | 0.445774    |
| hsa-miR-3679-5p     | 0.562431774  | 0.704315567 | 0.294796    |
| hsa-miR-7111-3p     | -0.971904654 | 0.753433722 | 0.364548    |
| hsa-miR-548c-5p     | 4.188767975  | 0.319598489 | 0.0825904   |
| hsa-miR-6727-5p     | -0.971904654 | 0.809838345 | 0.541562    |
| hsa-miR-128-1-5p    | 0.095209542  | 0.923639883 | 0.816358    |
| hsa-miR-4714-3p     | 0.028095346  | 0.948878581 | 0.859534    |
| hsa-miR-4753-3p     | 3.188767975  | 0.681401173 | 0.295508    |
| hsa-miR-15b-3p      | -0.162193541 | 5.59E-06    | 6.00E-07    |
| hsa-miR-7704        | -1.556867154 | 0.001343835 | 0.000195803 |
| hsa-miR-664b-3p     | 0.758488287  | 0.175500672 | 0.0393218   |
| novel-hsa-miR82-3p  | -0.749512232 | 0.526597981 | 0.1682942   |
| hsa-miR-181b-5p     | 0.401044392  | 4.21E-33    | 2.06E-34    |
| hsa-miR-196b-5p     | 0.135642237  | 0.021731722 | 0.00385346  |
| hsa-miR-132-5p      | 0.015490306  | 9.34E-05    | 1.17E-05    |
| hsa-miR-219b-5p     | -0.082935966 | 0.754058002 | 0.487676    |
| hsa-miR-3934-3p     | -0.293832748 | 0.777163832 | 0.617458    |
| hsa-miR-6509-5p     | 1.028095346  | 0.811934091 | 0.55245     |
| hsa-miR-1266-5p     | 0.028095346  | 0.938615674 | 0.914102    |
| novel-hsa-miR23-3p  | -2.160672629 | 0.765061385 | 0.444314    |
| hsa-miR-147b-3p     | -1.13156132  | 5.16E-07    | 5.07E-08    |
| hsa-miR-1909-3p     | 2.188767975  | 0.754456642 | 0.558972    |
| hsa-miR-3909        | -0.109408177 | 0.4428244   | 0.1278256   |
| hsa-miR-30c-5p      | -0.200473505 | 3.09E-22    | 1.83E-23    |
| hsa-miR-4504        | -0.556867154 | 0.749095128 | 0.583316    |
| novel-hsa-miR223-3p | -2.160672629 | 0.764157057 | 0.444314    |
| hsa-miR-6850-5p     | -0.971904654 | 0.809006889 | 0.541562    |
| hsa-miR-455-5p      | 0.317301809  | 0.566686278 | 0.1846112   |
| novel-hsa-miR126-3p | 0.028095346  | 0.893603819 | 0.772       |

|                     |              |             |            |
|---------------------|--------------|-------------|------------|
| novel-hsa-miR66-3p  | -3.160672629 | 0.585978865 | 0.209422   |
| hsa-miR-5585-3p     | 0.106097858  | 0.947712402 | 0.846102   |
| hsa-miR-6893-3p     | 0.028095346  | 0.937953745 | 0.914102   |
| hsa-miR-6889-3p     | 0.028095346  | 0.960756302 | 0.892744   |
| hsa-miR-195-3p      | 0.945633186  | 0.572535751 | 0.212094   |
| hsa-miR-1303        | -0.67150972  | 3.36E-07    | 3.26E-08   |
| hsa-miR-10392-5p    | 2.188767975  | 0.753757424 | 0.558972   |
| hsa-miR-624-5p      | 0.411423986  | 0.762450685 | 0.596336   |
| hsa-miR-6804-3p     | -2.160672629 | 0.763254864 | 0.444314   |
| hsa-miR-548ap-5p    | 0.028095346  | 0.959407483 | 0.875006   |
| hsa-miR-1304-5p     | -1.087381871 | 0.267429799 | 0.0669034  |
| hsa-miR-193b-5p     | 0.16429973   | 0.958819895 | 0.878424   |
| hsa-miR-7155-3p     | 3.773730476  | 0.505126207 | 0.1562246  |
| novel-hsa-miR20-5p  | 2.028095346  | 0.681367652 | 0.27723    |
| hsa-miR-550a-5p     | 0.150373251  | 0.808673813 | 0.660278   |
| hsa-miR-3605-5p     | -0.234939059 | 0.780605    | 0.624484   |
| hsa-miR-1268b       | 0.477174419  | 0.198226796 | 0.0461848  |
| hsa-miR-376b-5p     | -2.160672629 | 0.7623548   | 0.444314   |
| novel-hsa-miR306-3p | -0.638344165 | 2.50E-87    | 7.55E-89   |
| hsa-miR-6800-5p     | 2.188767975  | 0.7530595   | 0.558972   |
| hsa-miR-6857-5p     | -2.160672629 | 0.761456855 | 0.444314   |
| hsa-miR-653-3p      | 2.350023441  | 0.524116713 | 0.167141   |
| novel-hsa-miR241-3p | -2.160672629 | 0.759667297 | 0.444314   |
| hsa-miR-6871-3p     | -2.160672629 | 0.760561024 | 0.444314   |
| hsa-miR-215-3p      | 3.188767975  | 0.680323006 | 0.295508   |
| hsa-miR-10398-5p    | 3.188767975  | 0.679248246 | 0.295508   |
| hsa-miR-4470        | -2.160672629 | 0.758775669 | 0.444314   |
| hsa-miR-30b-3p      | 0.255987946  | 0.815545214 | 0.66757    |
| hsa-miR-4687-3p     | 0.350023441  | 0.956221317 | 0.898388   |
| hsa-miR-615-3p      | -0.08836363  | 0.152519136 | 0.0338582  |
| novel-hsa-miR315-3p | -2.160672629 | 0.757886131 | 0.444314   |
| hsa-miR-6776-5p     | 2.188767975  | 0.752362868 | 0.558972   |
| hsa-miR-6727-3p     | 2.188767975  | 0.751667523 | 0.558972   |
| hsa-miR-7977        | -2.160672629 | 0.756998677 | 0.444314   |
| hsa-miR-4787-5p     | -6.067563224 | 9.38E-05    | 1.19E-05   |
| hsa-miR-5581-3p     | 0.479791316  | 0.579401402 | 0.215832   |
| hsa-miR-516a-5p     | 0.350023441  | 0.941176181 | 0.838326   |
| hsa-miR-6806-5p     | 2.188767975  | 0.750973463 | 0.558972   |
| hsa-miR-10b-3p      | -0.811439981 | 0.066114016 | 0.01340456 |
| hsa-miR-29b-3p      | 0.059611388  | 3.03E-17    | 2.04E-18   |
| novel-hsa-miR77-3p  | 0.468667938  | 0.768438931 | 0.602604   |



|                     |              |             |             |
|---------------------|--------------|-------------|-------------|
| hsa-miR-454-5p      | 0.801502937  | 0.010306954 | 0.0017072   |
| hsa-miR-10400-5p    | -2.160672629 | 0.756113298 | 0.444314    |
| hsa-miR-548ay-3p    | 0.613057847  | 0.832063247 | 0.685094    |
| hsa-miR-6513-5p     | 0.028095346  | 0.937292748 | 0.914102    |
| hsa-miR-7974        | -0.789040596 | 0.057454898 | 0.01129354  |
| hsa-miR-200b-3p     | 0.277437739  | 0.122927241 | 0.0266976   |
| hsa-miR-6768-5p     | 0.028095346  | 0.918186589 | 0.810276    |
| hsa-miR-548ar-5p    | -2.779259576 | 0.119184617 | 0.0254752   |
| novel-hsa-miR172-5p | -1.25569762  | 0.000164107 | 2.14E-05    |
| novel-hsa-miR313-3p | 0.613057847  | 0.831369283 | 0.685094    |
| hsa-miR-1249-5p     | 0.269103446  | 0.968900525 | 0.912964    |
| hsa-miR-337-3p      | 3.188767975  | 0.678176877 | 0.295508    |
| hsa-miR-1305        | 0.765060941  | 0.777572839 | 0.626868    |
| hsa-miR-92a-3p      | 0.543774156  | 0           | 0           |
| hsa-miR-6852-5p     | 2.188767975  | 0.750280683 | 0.558972    |
| hsa-miR-937-3p      | -0.016298773 | 0.80514373  | 0.405062    |
| hsa-miR-4763-3p     | -3.160672629 | 0.584854146 | 0.209422    |
| hsa-miR-6870-3p     | 2.188767975  | 0.74958918  | 0.558972    |
| novel-hsa-miR170-3p | 3.773730476  | 0.504006193 | 0.1562246   |
| hsa-miR-6510-3p     | 0.028095346  | 0.936632683 | 0.914102    |
| hsa-miR-660-5p      | 0.164784018  | 0.847636971 | 0.434596    |
| novel-hsa-miR18-3p  | -0.779259576 | 0.437251461 | 0.1259164   |
| hsa-miR-550b-3p     | -1.152476899 | 0.010836265 | 0.001809768 |
| hsa-miR-520a-5p     | -2.160672629 | 0.755229988 | 0.444314    |
| hsa-miR-421         | -0.856782037 | 6.82E-54    | 2.53E-55    |
| hsa-miR-3180        | -1.194297075 | 0.50993851  | 0.1608672   |
| hsa-miR-378g        | 1.835450268  | 0.51878308  | 0.1558132   |
| hsa-miR-151a-5p     | 0.245605501  | 3.32E-05    | 3.99E-06    |
| hsa-miR-29a-5p      | 0.575583142  | 0.61051681  | 0.205184    |
| hsa-miR-6894-3p     | 2.028095346  | 0.680218634 | 0.27723     |
| hsa-miR-521         | 0.671951536  | 0.662383914 | 0.308202    |
| hsa-miR-151a-3p     | -0.316120816 | 2.25E-36    | 1.04E-37    |
| hsa-miR-12136       | -1.040852007 | 9.98E-34    | 4.80E-35    |
| hsa-miR-3941        | 2.188767975  | 0.74889895  | 0.558972    |
| hsa-miR-3155b       | 0.028095346  | 0.960046208 | 0.892744    |
| hsa-miR-200c-5p     | 1.028095346  | 0.843852683 | 0.71336     |
| novel-hsa-miR224-3p | -0.114862607 | 0.687471658 | 0.282076    |
| hsa-miR-26b-3p      | 0.618219552  | 0.124953387 | 0.0273094   |
| hsa-miR-4788        | -3.745635129 | 0.356376797 | 0.0987078   |
| hsa-miR-590-5p      | -0.028287123 | 0.269486672 | 0.0677884   |
| hsa-miR-1468-5p     | 0.028095346  | 0.948159189 | 0.859534    |

|                     |              |             |             |
|---------------------|--------------|-------------|-------------|
| hsa-miR-4796-3p     | -2.160672629 | 0.75434874  | 0.444314    |
| hsa-miR-3657        | 0.613057847  | 0.911174906 | 0.797826    |
| hsa-miR-148a-3p     | 0.278791418  | 0.775236114 | 0.614328    |
| hsa-miR-106b-3p     | 1.198020348  | 0.6502      | 0.26008     |
| hsa-miR-4482-3p     | -1.556867154 | 0.671663829 | 0.307442    |
| hsa-miR-6851-3p     | -2.160672629 | 0.753469545 | 0.444314    |
| novel-hsa-miR230-3p | -0.457331481 | 0.719868113 | 0.445774    |
| hsa-miR-570-3p      | -0.642597028 | 0.007841922 | 0.001277344 |
| hsa-miR-4762-3p     | 2.188767975  | 0.748209991 | 0.558972    |
| hsa-miR-6736-3p     | -2.160672629 | 0.752592398 | 0.444314    |
| hsa-miR-942-5p      | 0.202821334  | 0.958395583 | 0.897796    |
| novel-hsa-miR179-3p | 0.028095346  | 0.959337164 | 0.892744    |
| hsa-miR-129-2-3p    | 0.837817283  | 1.63E-05    | 1.86E-06    |
| hsa-miR-324-3p      | -0.117102569 | 0.000970644 | 0.000138092 |
| novel-hsa-miR311-5p | -0.556867154 | 0.69413908  | 0.326794    |
| hsa-miR-3177-5p     | 0.028095346  | 0.947440886 | 0.859534    |
| hsa-miR-4492        | -1.194297075 | 0.508829948 | 0.1608672   |
| hsa-miR-4779        | 1.028095346  | 0.843167181 | 0.71336     |
| hsa-miR-3126-3p     | -0.148782416 | 0.804309728 | 0.405748    |
| hsa-miR-5001-3p     | -0.358927777 | 0.669694576 | 0.298716    |
| hsa-miR-3145-3p     | 0.028095346  | 0.958685038 | 0.875006    |
| hsa-miR-7109-3p     | 4.188767975  | 0.318750748 | 0.0825904   |
| hsa-miR-4670-5p     | 2.188767975  | 0.747522298 | 0.558972    |
| hsa-miR-31-3p       | 0.201941729  | 0.921475844 | 0.813812    |
| hsa-miR-98-5p       | 0.255361638  | 7.19E-05    | 8.89E-06    |
| hsa-miR-6827-5p     | 0.028095346  | 0.958629166 | 0.892744    |
| hsa-miR-29a-3p      | -0.197127889 | 1.47E-269   | 2.02E-271   |
| hsa-miR-362-5p      | -0.124307786 | 1.04E-34    | 4.95E-36    |
| hsa-miR-1286        | -0.293832748 | 0.776492126 | 0.617458    |
| hsa-miR-505-3p      | -0.468138236 | 6.47E-11    | 5.25E-12    |
| hsa-miR-6780a-5p    | -2.160672629 | 0.751717291 | 0.444314    |
| hsa-miR-6802-3p     | -3.745635129 | 0.355494676 | 0.0987078   |
| hsa-miR-15a-5p      | 0.132307191  | 0.005422179 | 0.000868294 |
| hsa-miR-484         | 0.305846993  | 2.27E-07    | 2.17E-08    |
| hsa-miR-6770-5p     | 2.188767975  | 0.746835868 | 0.558972    |
| hsa-miR-550a-3-5p   | 1.530595687  | 0.196595616 | 0.0453994   |
| hsa-miR-4701-5p     | 3.188767975  | 0.677108882 | 0.295508    |
| hsa-miR-6777-5p     | -3.745635129 | 0.354616911 | 0.0987078   |
| novel-hsa-miR264-3p | 0.793291095  | 2.91E-116   | 7.79E-118   |
| hsa-miR-6848-5p     | 0.028095346  | 0.935973547 | 0.914102    |
| hsa-miR-432-5p      | 0.028095346  | 0.935315338 | 0.914102    |

|                     |              |             |             |
|---------------------|--------------|-------------|-------------|
| hsa-miR-204-3p      | -2.160672629 | 0.750844216 | 0.444314    |
| hsa-miR-6724-5p     | -0.534324586 | 0.001774911 | 0.000263492 |
| hsa-miR-124-3p      | -2.160672629 | 0.749973167 | 0.444314    |
| novel-hsa-miR61-5p  | -0.556867154 | 0.647393885 | 0.255398    |
| hsa-miR-3923        | 2.188767975  | 0.746150697 | 0.558972    |
| hsa-miR-96-3p       | 0.305629322  | 0.871498514 | 0.749908    |
| hsa-miR-6886-5p     | -2.160672629 | 0.749104137 | 0.444314    |
| hsa-miR-3184-5p     | 2.188767975  | 0.745466783 | 0.558972    |
| hsa-miR-4676-5p     | 0.028095346  | 0.934658053 | 0.914102    |
| hsa-miR-320d        | 0.350023441  | 0.847695547 | 0.702626    |
| novel-hsa-miR171-5p | 2.028095346  | 0.679073485 | 0.27723     |
| hsa-miR-3620-5p     | 2.188767975  | 0.744784121 | 0.558972    |
| hsa-miR-95-3p       | 1.028095346  | 0.842482792 | 0.71336     |
| hsa-miR-4688        | -1.556867154 | 0.670656837 | 0.307442    |
| hsa-miR-222-3p      | 0.231495104  | 2.25E-07    | 2.17E-08    |
| hsa-miR-3176        | -0.686927695 | 0.002504513 | 0.000376968 |
| hsa-miR-6824-3p     | 0.443132846  | 0.951238509 | 0.855134    |
| hsa-miR-9986        | -0.556867154 | 0.834513785 | 0.427294    |
| novel-hsa-miR188-5p | -3.844029831 | 0           | 0           |
| hsa-miR-4796-5p     | -3.160672629 | 0.583733736 | 0.209422    |
| hsa-miR-1180-3p     | 0.034130333  | 3.75E-09    | 3.35E-10    |
| novel-hsa-miR138-3p | -1.556867154 | 0.669652859 | 0.307442    |
| hsa-miR-3944-5p     | 0.291129752  | 0.9461132   | 0.85963     |
| hsa-miR-548at-5p    | 0.420412769  | 0.780665578 | 0.510786    |
| hsa-miR-664a-3p     | 0.260541432  | 0.832776095 | 0.687398    |
| hsa-miR-143-5p      | -4.160672629 | 0.196782828 | 0.0465246   |
| hsa-miR-34c-3p      | -0.971904654 | 0.808177138 | 0.541562    |
| hsa-miR-503-5p      | 0.083897138  | 0.179540809 | 0.0405972   |
| hsa-miR-1234-3p     | -2.160672629 | 0.748237118 | 0.444314    |
| hsa-miR-6875-3p     | 0.028095346  | 0.957922212 | 0.892744    |
| hsa-miR-19a-5p      | 3.188767975  | 0.676044245 | 0.295508    |
| hsa-miR-6789-3p     | 0.613057847  | 0.910460259 | 0.797826    |
| novel-hsa-miR236-5p | 0.835450268  | 0.695680611 | 0.328476    |
| hsa-miR-1233-3p     | 2.188767975  | 0.744102708 | 0.558972    |
| novel-hsa-miR26-5p  | -0.846373771 | 0.517160764 | 0.1539042   |
| hsa-miR-193a-3p     | -0.271464935 | 0.070315923 | 0.01430482  |
| novel-hsa-miR88-3p  | 0.028095346  | 0.957963679 | 0.875006    |
| hsa-miR-6501-3p     | 1.028095346  | 0.841799513 | 0.71336     |
| novel-hsa-miR52-3p  | -4.482600724 | 0.104954319 | 0.0219286   |
| hsa-miR-1260b       | -3.474404994 | 5.84E-30    | 2.89E-31    |
| hsa-miR-4655-3p     | -2.160672629 | 0.747372104 | 0.444314    |

|                     |              |             |            |
|---------------------|--------------|-------------|------------|
| hsa-miR-1277-3p     | -0.103149187 | 0.704895762 | 0.333796   |
| hsa-miR-1538        | 0.41511847   | 0.837093067 | 0.692112   |
| hsa-miR-30c-2-3p    | 0.421552315  | 0.000392    | 5.42E-05   |
| hsa-miR-1243        | 1.835450268  | 0.517598644 | 0.1558132  |
| hsa-miR-3116        | 3.188767975  | 0.674982951 | 0.295508   |
| hsa-miR-30e-3p      | -0.105053964 | 0.024127565 | 0.00434462 |
| hsa-miR-149-5p      | 0.176297733  | 0.728359242 | 0.561162   |
| hsa-miR-3198        | 0.028095346  | 0.957216301 | 0.892744   |
| novel-hsa-miR168-3p | 0.028095346  | 0.957243406 | 0.875006   |
| novel-hsa-miR295-3p | -2.160672629 | 0.746509088 | 0.444314   |
| hsa-miR-221-3p      | 0.54926572   | 2.02E-107   | 5.83E-109  |
| hsa-miR-6835-5p     | -2.160672629 | 0.745648062 | 0.444314   |
| hsa-miR-3139        | 0.765060941  | 0.776910511 | 0.626868   |
| novel-hsa-miR229-3p | -2.334474733 | 7.84E-06    | 8.62E-07   |
| novel-hsa-miR138-5p | -1.556867154 | 0.668651883 | 0.307442   |
| hsa-miR-449b-5p     | 1.613057847  | 0.716002959 | 0.450762   |
| hsa-miR-4636        | 0.028095346  | 0.934001692 | 0.914102   |
| novel-hsa-miR102-3p | 0.028095346  | 0.933346253 | 0.914102   |
| hsa-miR-4652-5p     | -0.386942153 | 0.769656844 | 0.605146   |
| hsa-miR-652-3p      | 0.37458337   | 1.55E-05    | 1.76E-06   |
| novel-hsa-miR131-3p | -5.861112347 | 0.000388588 | 5.34E-05   |
| hsa-miR-1262        | -0.194297075 | 0.775353333 | 0.628276   |
| novel-hsa-miR240-5p | -0.971904654 | 0.807349088 | 0.541562   |
| hsa-miR-4662a-5p    | -1.556867154 | 0.445335255 | 0.1294686  |
| hsa-miR-4795-3p     | 2.188767975  | 0.743422541 | 0.558972   |
| hsa-miR-29c-5p      | -0.320799796 | 0.031272477 | 0.00580314 |
| hsa-miR-374b-5p     | 7.616612744  | 0           | 0          |
| novel-hsa-miR78-5p  | -2.160672629 | 0.744789021 | 0.444314   |
| hsa-miR-30c-1-3p    | 0.572149904  | 0.058519595 | 0.01158326 |
| hsa-miR-616-3p      | 0.350023441  | 0.955522325 | 0.898388   |
| hsa-miR-212-3p      | -0.045905235 | 0.607801602 | 0.203436   |
| hsa-miR-1224-5p     | 2.188767975  | 0.742743616 | 0.558972   |
| hsa-miR-561-5p      | 0.083948581  | 0.777793353 | 0.632926   |
| hsa-miR-10396b-5p   | -2.779259576 | 0.118802615 | 0.0254752  |
| hsa-miR-4772-5p     | -2.160672629 | 0.743931956 | 0.444314   |
| hsa-miR-4786-3p     | -2.160672629 | 0.743076862 | 0.444314   |
| hsa-miR-6764-3p     | 2.188767975  | 0.742065931 | 0.558972   |
| hsa-miR-3158-3p     | -3.293832748 | 0.019836842 | 0.00347656 |
| hsa-miR-23b-5p      | 0.383190305  | 0.799482929 | 0.525296   |
| hsa-miR-3913-5p     | -2.160672629 | 0.742223731 | 0.444314   |
| novel-hsa-miR283-5p | -1.64006109  | 1.03E-46    | 4.11E-48   |

|                     |              |             |             |
|---------------------|--------------|-------------|-------------|
| hsa-miR-125b-5p     | -0.122031375 | 1.45E-27    | 7.37E-29    |
| hsa-miR-592         | 0.091289173  | 0.822695784 | 0.674554    |
| hsa-miR-6741-5p     | 0.028095346  | 0.956511429 | 0.892744    |
| hsa-miR-3189-5p     | -2.971904654 | 0.065431944 | 0.0132213   |
| hsa-miR-3651        | 2.188767975  | 0.74138948  | 0.558972    |
| hsa-miR-6804-5p     | -3.745635129 | 0.35374347  | 0.0987078   |
| hsa-miR-545-5p      | 1.613057847  | 0.715222148 | 0.450762    |
| novel-hsa-miR53-3p  | -2.160672629 | 0.741372557 | 0.444314    |
| novel-hsa-miR161-3p | -3.745635129 | 0.352874322 | 0.0987078   |
| hsa-miR-940         | -1.667898467 | 2.27E-66    | 7.34E-68    |
| hsa-miR-33b-3p      | -1.556867154 | 0.667653896 | 0.307442    |
| novel-hsa-miR72-3p  | 3.487526965  | 0.033938945 | 0.0063446   |
| hsa-miR-588         | -3.160672629 | 0.58261761  | 0.209422    |
| novel-hsa-miR135-5p | 3.773730476  | 0.502891135 | 0.1562246   |
| hsa-miR-302c-3p     | -3.745635129 | 0.352009434 | 0.0987078   |
| hsa-miR-671-3p      | 0.477898264  | 0.719370476 | 0.342628    |
| hsa-miR-545-3p      | 0.411423986  | 0.761781282 | 0.596336    |
| hsa-miR-184         | 2.188767975  | 0.740714262 | 0.558972    |
| novel-hsa-miR24-3p  | -2.160672629 | 0.740523333 | 0.444314    |
| novel-hsa-miR152-3p | 0.028095346  | 0.955807594 | 0.892744    |
| hsa-miR-449c-5p     | 0.835450268  | 0.777885884 | 0.507898    |
| hsa-miR-93-3p       | 0.142111607  | 0.799059992 | 0.65133     |
| hsa-miR-135b-5p     | -0.134319513 | 0.003947154 | 0.000621236 |
| novel-hsa-miR191-3p | 0.250487768  | 0.968311556 | 0.962322    |
| hsa-miR-195-5p      | -0.993599725 | 5.68E-18    | 3.75E-19    |
| novel-hsa-miR151-5p | -1.293832748 | 0.586770055 | 0.22019     |
| hsa-miR-6800-3p     | -2.160672629 | 0.739676053 | 0.444314    |
| hsa-miR-3913-3p     | 0.443132846  | 0.950511818 | 0.855134    |
| hsa-miR-548j-3p     | 2.188767975  | 0.740040273 | 0.558972    |
| hsa-miR-1292-3p     | -1.971904654 | 0.185061934 | 0.0421      |
| hsa-miR-6814-3p     | 0.443132846  | 0.949786237 | 0.855134    |
| novel-hsa-miR158-3p | 0.332949928  | 0.900531833 | 0.779842    |
| hsa-miR-125a-3p     | -0.354761747 | 4.67E-06    | 4.94E-07    |
| novel-hsa-miR130-3p | -0.62398135  | 0.629323875 | 0.242214    |
| hsa-miR-6735-3p     | 2.188767975  | 0.739367509 | 0.558972    |
| novel-hsa-miR246-5p | -2.160672629 | 0.738830709 | 0.444314    |
| hsa-miR-548av-3p    | 6.996122897  | 1.99E-07    | 1.88E-08    |
| hsa-miR-328-5p      | 3.773730476  | 0.501781    | 0.1562246   |
| novel-hsa-miR40-5p  | 0.513522174  | 0.854257548 | 0.732724    |
| hsa-let-7a-2-3p     | 0.357663504  | 0.190463856 | 0.0437216   |
| hsa-miR-3187-5p     | 1.613057847  | 0.714443039 | 0.450762    |

|                     |              |             |             |
|---------------------|--------------|-------------|-------------|
| hsa-miR-6820-5p     | 1.487526965  | 0.429570998 | 0.1234094   |
| hsa-miR-6819-3p     | 1.613057847  | 0.624225848 | 0.242826    |
| hsa-miR-3121-3p     | 0.613057847  | 0.909746732 | 0.797826    |
| hsa-miR-450b-5p     | 0.350023441  | 0.853156326 | 0.729434    |
| novel-hsa-miR128-3p | 1.028095346  | 0.841117342 | 0.71336     |
| hsa-miR-6894-5p     | 0.028095346  | 0.932691732 | 0.914102    |
| novel-hsa-miR40-3p  | 2.188767975  | 0.738695967 | 0.558972    |
| hsa-miR-4683        | 1.028095346  | 0.756064922 | 0.36738     |
| hsa-miR-6737-5p     | 1.350023441  | 0.758891983 | 0.37084     |
| hsa-miR-1228-5p     | 3.188767975  | 0.673924984 | 0.295508    |
| hsa-miR-642a-5p     | -0.188716043 | 0.619583568 | 0.236336    |
| hsa-miR-6753-3p     | -2.160672629 | 0.737987295 | 0.444314    |
| hsa-miR-299-3p      | -2.160672629 | 0.73630623  | 0.444314    |
| novel-hsa-miR168-5p | -2.160672629 | 0.737145804 | 0.444314    |
| hsa-miR-636         | -0.355233293 | 0.52631743  | 0.168928    |
| novel-hsa-miR224-5p | 3.188767975  | 0.672870329 | 0.295508    |
| hsa-miR-4254        | 2.188767975  | 0.738025644 | 0.558972    |
| hsa-miR-6783-5p     | 1.028095346  | 0.71761115  | 0.445856    |
| hsa-miR-580-3p      | -0.971904654 | 0.648834343 | 0.25775     |
| hsa-miR-3174        | 0.028095346  | 0.932038129 | 0.914102    |
| hsa-miR-6834-5p     | -3.160672629 | 0.581505744 | 0.209422    |
| hsa-miR-25-5p       | -0.323276526 | 1.10E-06    | 1.11E-07    |
| novel-hsa-miR213-3p | 0.350023441  | 0.85247106  | 0.729434    |
| hsa-miR-137-3p      | 0.103801281  | 1.04E-05    | 1.16E-06    |
| hsa-miR-3939        | 0.250487768  | 0.944764485 | 0.933726    |
| novel-hsa-miR246-3p | -3.160672629 | 0.580398114 | 0.209422    |
| hsa-miR-424-5p      | 0.108540053  | 0.003527864 | 0.000545546 |
| hsa-miR-194-5p      | 0.492498923  | 0.072790779 | 0.01495838  |
| hsa-miR-548b-3p     | 0.106950767  | 0.730622674 | 0.563408    |
| hsa-miR-6842-3p     | -0.971904654 | 0.806522733 | 0.541562    |
| hsa-miR-5189-3p     | -1.556867154 | 0.444284936 | 0.1294686   |
| hsa-miR-148a-5p     | -0.293832748 | 0.77582158  | 0.617458    |
| hsa-miR-4742-3p     | 1.250487768  | 0.661485794 | 0.309148    |
| hsa-miR-190b-5p     | -0.011433018 | 0.789064561 | 0.388838    |
| hsa-miR-4781-3p     | 0.028095346  | 0.931385441 | 0.914102    |
| novel-hsa-miR292-3p | -2.160672629 | 0.735468567 | 0.444314    |
| hsa-miR-3944-3p     | 0.468667938  | 0.714708652 | 0.451912    |
| novel-hsa-miR27-5p  | 0.613057847  | 0.909034323 | 0.797826    |
| hsa-miR-4440        | -0.386942153 | 0.768984655 | 0.605146    |
| hsa-miR-378h        | -2.160672629 | 0.734632807 | 0.444314    |
| hsa-miR-1255a       | 1.613057847  | 0.471697497 | 0.1397262   |

|                     |              |             |             |
|---------------------|--------------|-------------|-------------|
| hsa-miR-7976        | -0.234939059 | 0.751865085 | 0.487808    |
| hsa-miR-99b-5p      | -0.150778128 | 1.03E-208   | 1.70E-210   |
| novel-hsa-miR169-3p | 0.028095346  | 0.930733667 | 0.914102    |
| hsa-miR-548au-5p    | 0.028095346  | 0.946723671 | 0.859534    |
| hsa-miR-494-3p      | -2.160672629 | 0.733798944 | 0.444314    |
| novel-hsa-miR289-3p | -1.293832748 | 0.585697349 | 0.22019     |
| hsa-miR-221-5p      | 0.38039709   | 0.782533505 | 0.512546    |
| novel-hsa-miR266-3p | -2.293832748 | 0.343959744 | 0.0914862   |
| hsa-miR-548at-3p    | 0.028095346  | 0.937341833 | 0.832978    |
| hsa-miR-3664-3p     | -0.62398135  | 0.179811384 | 0.0405348   |
| hsa-let-7f-2-3p     | -2.160672629 | 0.732966973 | 0.444314    |
| hsa-miR-551a        | -3.160672629 | 0.579294696 | 0.209422    |
| hsa-miR-4749-5p     | -2.160672629 | 0.732136886 | 0.444314    |
| hsa-miR-4660        | 2.188767975  | 0.737356537 | 0.558972    |
| novel-hsa-miR70-3p  | -1.556867154 | 0.666658882 | 0.307442    |
| hsa-miR-619-5p      | -0.054366814 | 0.768563614 | 0.607984    |
| hsa-miR-215-5p      | 3.188767975  | 0.671818969 | 0.295508    |
| hsa-miR-1292-5p     | -0.690133685 | 1.89E-05    | 2.19E-06    |
| hsa-miR-597-5p      | -3.745635129 | 0.351148775 | 0.0987078   |
| hsa-miR-550a-3p     | -0.301610099 | 0.124058716 | 0.0270286   |
| hsa-miR-150-5p      | -0.428418789 | 7.55E-05    | 9.39E-06    |
| hsa-miR-6758-3p     | -2.160672629 | 0.730482339 | 0.444314    |
| novel-hsa-miR226-5p | -2.160672629 | 0.731308676 | 0.444314    |
| hsa-miR-361-3p      | 0.85525875   | 0.019776633 | 0.0034796   |
| hsa-miR-3127-3p     | 0.568663728  | 0.797184434 | 0.52269     |
| hsa-let-7e-5p       | 0.662896829  | 3.25E-211   | 5.13E-213   |
| hsa-miR-628-5p      | 0.156419443  | 0.958090793 | 0.896852    |
| novel-hsa-miR287-5p | -3.160672629 | 0.578195465 | 0.209422    |
| hsa-miR-5189-5p     | 0.028095346  | 0.930082804 | 0.914102    |
| hsa-let-7f-1-3p     | 0.443132846  | 0.949061762 | 0.855134    |
| hsa-miR-100-3p      | 0.555545389  | 0.006076142 | 0.000977194 |
| hsa-miR-760         | 0.488936535  | 0.456669852 | 0.1337054   |
| hsa-let-7c-3p       | 0.765060941  | 0.691383184 | 0.286532    |
| hsa-miR-6777-3p     | 0.443132846  | 0.948338392 | 0.855134    |
| hsa-miR-323a-5p     | -3.160672629 | 0.577100398 | 0.209422    |
| hsa-miR-345-5p      | -0.072377446 | 1.85E-06    | 1.92E-07    |
| hsa-miR-877-5p      | -0.006530997 | 0.128434082 | 0.0281584   |
| hsa-miR-5008-5p     | -1.971904654 | 0.525859337 | 0.1695038   |
| hsa-miR-27b-5p      | 0.0944096    | 0.621318959 | 0.237852    |
| hsa-miR-301b-3p     | -0.380918365 | 0.000364784 | 4.94E-05    |
| novel-hsa-miR37-3p  | -0.556867154 | 0.74843455  | 0.583316    |

|                     |              |             |            |
|---------------------|--------------|-------------|------------|
| hsa-miR-5000-3p     | 2.188767975  | 0.736688641 | 0.558972   |
| hsa-miR-1227-3p     | 0.301113841  | 0.917156087 | 0.79739    |
| novel-hsa-miR278-3p | -0.386942153 | 0.768313639 | 0.605146   |
| hsa-miR-6843-3p     | 2.188767975  | 0.736021955 | 0.558972   |
| hsa-miR-659-3p      | -0.971904654 | 0.647713731 | 0.25775    |
| hsa-miR-3929        | 0.028095346  | 0.769108958 | 0.608944   |
| hsa-miR-6813-5p     | 1.613057847  | 0.713665626 | 0.450762   |
| hsa-miR-1256        | 3.028095346  | 0.153287196 | 0.033818   |
| hsa-miR-4755-3p     | -3.745635129 | 0.350292315 | 0.0987078  |
| hsa-miR-199a-3p     | -8.183040442 | 8.90E-21    | 5.51E-22   |
| hsa-miR-6737-3p     | 2.188767975  | 0.735356474 | 0.558972   |
| hsa-miR-30d-3p      | 0.199028168  | 0.978975341 | 0.976284   |
| hsa-miR-125b-1-3p   | -2.607941339 | 1.39E-116   | 3.63E-118  |
| hsa-miR-32-3p       | -0.234939059 | 0.779934953 | 0.624484   |
| hsa-miR-1307-5p     | -5.275685402 | 2.39E-22    | 1.40E-23   |
| hsa-miR-4435        | -0.556867154 | 0.605621296 | 0.20229    |
| hsa-miR-708-5p      | -2.431336272 | 0.037074247 | 0.00700716 |
| hsa-miR-4466        | -1.117982913 | 5.59E-17    | 3.84E-18   |
| hsa-miR-4769-3p     | 1.613057847  | 0.623124921 | 0.242826   |
| hsa-miR-1910-5p     | 0.274255934  | 0.914628655 | 0.794564   |
| hsa-miR-6764-5p     | 3.773730476  | 0.500675756 | 0.1562246  |
| novel-hsa-miR124-5p | 3.188767975  | 0.670770889 | 0.295508   |
| hsa-miR-548y        | 1.028095346  | 0.840436275 | 0.71336    |
| hsa-miR-181a-3p     | 0.022631736  | 0.000328062 | 4.37E-05   |
| hsa-miR-664a-5p     | 3.773730476  | 0.499575369 | 0.1562246  |
| hsa-miR-34a-5p      | 0.138224291  | 0.271605286 | 0.068508   |
| hsa-miR-335-5p      | 0.613057847  | 0.766815365 | 0.606074   |
| hsa-miR-9899        | -1.556867154 | 0.66566683  | 0.307442   |
| hsa-miR-219b-3p     | -3.160672629 | 0.576009471 | 0.209422   |
| hsa-miR-99b-3p      | 0.195665595  | 0.975000829 | 0.96964    |
| hsa-miR-26a-5p      | 0.115411141  | 3.62E-20    | 2.26E-21   |
| novel-hsa-miR242-5p | 0.613057847  | 0.908323028 | 0.797826   |
| hsa-miR-16-2-3p     | -0.343271681 | 0.019423387 | 0.0033774  |
| hsa-miR-1225-5p     | 1.028095346  | 0.839756311 | 0.71336    |
| hsa-miR-181a-5p     | 0.029206666  | 6.96E-41    | 3.01E-42   |
| hsa-miR-4662a-3p    | -2.160672629 | 0.729657867 | 0.444314   |
| hsa-miR-6747-3p     | 1.835450268  | 0.516419604 | 0.1558132  |
| hsa-miR-190a-5p     | -0.032025646 | 0.859014104 | 0.44161    |
| hsa-miR-4766-3p     | -0.779259576 | 0.69231897  | 0.286444   |
| hsa-miR-6749-3p     | 2.198020348  | 0.246497958 | 0.0611586  |
| hsa-miR-6728-3p     | -3.160672629 | 0.57492266  | 0.209422   |



|                     |              |             |             |
|---------------------|--------------|-------------|-------------|
| hsa-miR-4647        | 2.188767975  | 0.734692195 | 0.558972    |
| hsa-miR-3165        | 1.028095346  | 0.811114783 | 0.55245     |
| novel-hsa-miR94-3p  | -0.386942153 | 0.767643793 | 0.605146    |
| hsa-miR-374c-3p     | -1.750863907 | 0           | 0           |
| hsa-miR-4701-3p     | 2.188767975  | 0.734029116 | 0.558972    |
| hsa-miR-3130-3p     | -0.252012573 | 0.592787523 | 0.2253      |
| hsa-miR-6845-3p     | 2.188767975  | 0.733367232 | 0.558972    |
| hsa-miR-320b        | 0.999713545  | 0.000347206 | 4.65E-05    |
| hsa-miR-122b-5p     | 2.188767975  | 0.732706541 | 0.558972    |
| hsa-miR-505-5p      | 0.161361877  | 0.956052684 | 0.89363     |
| novel-hsa-miR146-3p | -0.944358327 | 7.47E-41    | 3.29E-42    |
| hsa-miR-5583-3p     | -0.971904654 | 0.646596983 | 0.25775     |
| hsa-let-7a-5p       | 0.359983345  | 1.91E-110   | 5.37E-112   |
| hsa-miR-3664-5p     | 1.028095346  | 0.839077445 | 0.71336     |
| hsa-miR-192-5p      | 0.253707436  | 0.671164619 | 0.314594    |
| hsa-miR-7-5p        | -7.725982335 | 0           | 0           |
| hsa-miR-548l        | 0.390665426  | 0.838789928 | 0.715998    |
| novel-hsa-miR63-5p  | -1.75917533  | 1.02E-23    | 5.69E-25    |
| hsa-miR-9902        | 3.188767975  | 0.669726075 | 0.295508    |
| hsa-miR-6830-3p     | 3.773730476  | 0.498479809 | 0.1562246   |
| hsa-miR-3136-5p     | 0.350023441  | 0.954824354 | 0.898388    |
| hsa-miR-1283        | 0.674458392  | 0.580755167 | 0.215538    |
| hsa-miR-629-3p      | -3.878795249 | 0.000796626 | 0.000112239 |
| hsa-miR-5689        | 2.188767975  | 0.732047039 | 0.558972    |
| hsa-miR-130b-3p     | 0.072489466  | 0.758692076 | 0.369178    |
| hsa-let-7c-5p       | -0.551716119 | 9.39E-64    | 3.16E-65    |
| hsa-miR-548z        | -2.160672629 | 0.728835254 | 0.444314    |
| hsa-miR-203a-3p     | -1.708870248 | 9.96E-06    | 1.10E-06    |
| hsa-miR-377-3p      | -1.556867154 | 0.664677727 | 0.307442    |
| hsa-miR-6783-3p     | -0.386942153 | 0.766975113 | 0.605146    |
| novel-hsa-miR57-3p  | -0.971904654 | 0.805698067 | 0.541562    |
| novel-hsa-miR26-3p  | 0.291129752  | 0.780381724 | 0.62216     |
| hsa-miR-6815-5p     | 0.876092253  | 0.621358273 | 0.23744     |
| hsa-miR-6746-5p     | 3.188767975  | 0.66868451  | 0.295508    |
| hsa-miR-374c-5p     | -1.556867154 | 0.44323956  | 0.1294686   |
| hsa-miR-6772-3p     | -2.160672629 | 0.728014493 | 0.444314    |
| novel-hsa-miR99-5p  | -3.160672629 | 0.573839944 | 0.209422    |
| hsa-miR-874-3p      | -2.160672629 | 0.727195579 | 0.444314    |
| hsa-miR-130a-5p     | 0.607644351  | 0.016712869 | 0.0028946   |
| hsa-miR-199b-3p     | 3.028095346  | 0.152811149 | 0.033818    |
| hsa-miR-454-3p      | 0.034090971  | 0.00382628  | 0.000599582 |

|                     |              |             |             |
|---------------------|--------------|-------------|-------------|
| hsa-miR-1278        | -0.261411271 | 0.74897016  | 0.483356    |
| hsa-miR-331-3p      | -3.095287069 | 1.68E-24    | 9.25E-26    |
| hsa-miR-187-3p      | 0.787087247  | 0.62929645  | 0.246096    |
| hsa-miR-3150a-3p    | 0.835450268  | 0.777067918 | 0.507898    |
| hsa-miR-5699-3p     | 2.188767975  | 0.731388723 | 0.558972    |
| hsa-miR-6746-3p     | 0.613057847  | 0.830676475 | 0.685094    |
| novel-hsa-miR201-3p | -3.141829655 | 0.036129774 | 0.00680382  |
| hsa-miR-577         | -0.1306024   | 0.689485084 | 0.283376    |
| hsa-miR-6505-3p     | -2.160672629 | 0.726378506 | 0.444314    |
| hsa-miR-579-3p      | 0.21201362   | 0.969606345 | 0.891638    |
| hsa-miR-382-5p      | 0.028095346  | 0.929432851 | 0.914102    |
| novel-hsa-miR206-3p | -5.620104247 | 0.001627123 | 0.000240434 |
| novel-hsa-miR233-3p | 3.188767975  | 0.66764618  | 0.295508    |
| hsa-miR-4473        | -0.164549732 | 0.805922709 | 0.4049      |
| hsa-miR-1973        | -4.181358019 | 2.02E-09    | 1.76E-10    |
| hsa-miR-218-1-3p    | 1.613057847  | 0.319688135 | 0.083053    |
| hsa-miR-3129-3p     | 3.188767975  | 0.66661107  | 0.295508    |
| hsa-miR-6866-5p     | -2.160672629 | 0.725563266 | 0.444314    |
| hsa-miR-3115        | 0.960981151  | 0.520912127 | 0.1553786   |
| hsa-miR-4746-5p     | -2.293832748 | 0.34307325  | 0.0914862   |
| hsa-miR-107         | -0.457331481 | 0.719070033 | 0.445774    |
| hsa-miR-5010-3p     | -0.350416277 | 0.608559713 | 0.204108    |
| hsa-miR-188-5p      | -1.862549919 | 3.31E-167   | 7.05E-169   |
| novel-hsa-miR28-5p  | 2.188767975  | 0.73073159  | 0.558972    |
| hsa-miR-6873-3p     | -2.779259576 | 0.118423054 | 0.0254752   |
| hsa-miR-4775        | 0.380080675  | 0.803966337 | 0.402812    |
| hsa-miR-4507        | 3.773730476  | 0.497389044 | 0.1562246   |
| hsa-miR-495-3p      | -2.293832748 | 0.342191314 | 0.0914862   |
| hsa-miR-4658        | 2.188767975  | 0.730075637 | 0.558972    |
| hsa-miR-933         | 1.028095346  | 0.838399677 | 0.71336     |
| hsa-miR-4516        | -1.272209937 | 5.03E-22    | 3.01E-23    |
| hsa-miR-1910-3p     | -0.971904654 | 0.804875087 | 0.541562    |
| novel-hsa-miR1-3p   | -2.160672629 | 0.724749854 | 0.444314    |
| hsa-miR-152-5p      | 0.028095346  | 0.928783806 | 0.914102    |
| hsa-miR-409-3p      | -1.556867154 | 0.663691558 | 0.307442    |
| hsa-miR-204-5p      | -2.194297075 | 3.48E-16    | 2.46E-17    |
| hsa-miR-3940-3p     | 0.493758919  | 0.744938167 | 0.477682    |
| novel-hsa-miR164-3p | 3.835450268  | 0.007037185 | 0.00113659  |
| hsa-miR-1249-3p     | 1.543933487  | 1.37E-09    | 1.17E-10    |
| hsa-miR-4787-3p     | -0.19207925  | 2.92E-05    | 3.45E-06    |
| hsa-miR-548az-3p    | -2.160672629 | 0.723938264 | 0.444314    |

|                     |              |             |            |
|---------------------|--------------|-------------|------------|
| hsa-miR-212-5p      | 1.398463796  | 1.79E-05    | 2.07E-06   |
| novel-hsa-miR169-5p | 0.613057847  | 0.907612846 | 0.797826   |
| hsa-miR-183-5p      | 2.501712871  | 0           | 0          |
| hsa-miR-6878-3p     | 2.188767975  | 0.729420861 | 0.558972   |
| hsa-miR-6732-3p     | 0.028095346  | 0.956524215 | 0.875006   |
| hsa-miR-15a-3p      | -5.431336272 | 1.31E-12    | 9.89E-14   |
| hsa-miR-135b-3p     | -0.234939059 | 0.779266055 | 0.624484   |
| novel-hsa-miR91-5p  | 1.198020348  | 0.649084734 | 0.26008    |
| hsa-miR-3614-3p     | 3.773730476  | 0.496303041 | 0.1562246  |
| hsa-miR-548ai       | -4.745635129 | 0.052952676 | 0.01033578 |
| hsa-miR-501-3p      | 0.130519604  | 0.65339964  | 0.262258   |
| hsa-miR-574-5p      | 0.285673344  | 0.039736893 | 0.00753772 |
| novel-hsa-miR60-3p  | -1.219832167 | 0.078818029 | 0.01625114 |
| hsa-miR-103b        | 0.368210893  | 1.30E-07    | 1.21E-08   |
| hsa-miR-1226-5p     | 1.028095346  | 0.684247224 | 0.306618   |
| hsa-miR-4657        | -0.971904654 | 0.804053786 | 0.541562   |
| hsa-miR-4767        | -3.160672629 | 0.572761297 | 0.209422   |
| hsa-miR-296-3p      | 0.765060941  | 0.776249311 | 0.626868   |
| hsa-miR-214-3p      | -2.878795249 | 0.003626427 | 0.00056328 |
| hsa-miR-877-3p      | 0.338435467  | 0.841626782 | 0.718998   |
| hsa-miR-519c-5p     | -4.745635129 | 0.052766877 | 0.01033578 |
| novel-hsa-miR247-5p | 1.492087305  | 1.10E-58    | 3.76E-60   |
| hsa-miR-27b-3p      | 0.138811295  | 0.198053757 | 0.0469612  |
| hsa-miR-6885-3p     | 0.028095346  | 0.955806104 | 0.875006   |
| hsa-miR-21-5p       | 0.019794322  | 3.51E-144   | 7.97E-146  |
| novel-hsa-miR241-5p | 3.188767975  | 0.665579164 | 0.295508   |
| hsa-miR-197-3p      | 0.266749306  | 0.030419236 | 0.0056239  |
| novel-hsa-miR30-3p  | -4.266525402 | 1.38E-158   | 3.04E-160  |
| novel-hsa-miR180-3p | -0.556867154 | 0.646267983 | 0.255398   |
| hsa-miR-326         | 0.005727533  | 0.722624723 | 0.457414   |
| hsa-miR-24-2-5p     | -0.386942153 | 0.591988183 | 0.1961088  |
| hsa-miR-4786-5p     | -0.971904654 | 0.803234159 | 0.541562   |
| hsa-miR-4485-5p     | 1.028095346  | 0.71681821  | 0.445856   |
| hsa-miR-5582-3p     | 0.331164414  | 0.818557484 | 0.538954   |
| hsa-miR-548g-5p     | 2.188767975  | 0.728767258 | 0.558972   |
| hsa-miR-145-5p      | -2.127834786 | 0           | 0          |
| novel-hsa-miR162-3p | 1.713661788  | 2.44E-13    | 1.79E-14   |
| hsa-miR-602         | -3.745635129 | 0.349440022 | 0.0987078  |
| novel-hsa-miR154-5p | -3.160672629 | 0.571686698 | 0.209422   |
| hsa-miR-3529-3p     | 8.114262437  | 0           | 0          |
| hsa-miR-4661-5p     | 1.16559887   | 0.5826984   | 0.220264   |

|                     |              |             |            |
|---------------------|--------------|-------------|------------|
| hsa-miR-6817-5p     | -2.160672629 | 0.72312849  | 0.444314   |
| hsa-miR-16-5p       | -0.072622152 | 1.54E-259   | 2.22E-261  |
| hsa-miR-5582-5p     | -3.160672629 | 0.570616124 | 0.209422   |
| hsa-miR-3159        | 2.188767975  | 0.728114825 | 0.558972   |
| hsa-miR-10401-5p    | -2.160672629 | 0.722320525 | 0.444314   |
| novel-hsa-miR294-3p | -3.628251788 | 1.11E-65    | 3.66E-67   |
| novel-hsa-miR159-5p | 1.028095346  | 0.810297127 | 0.55245    |
| hsa-miR-217-5p      | 2.188767975  | 0.72746356  | 0.558972   |
| hsa-miR-1293        | 0.028095346  | 0.928135666 | 0.914102   |
| hsa-miR-4785        | -2.160672629 | 0.72071     | 0.444314   |
| hsa-miR-4723-5p     | -2.160672629 | 0.721514364 | 0.444314   |
| hsa-miR-7706        | 0.337045587  | 0.812826518 | 0.550264   |
| novel-hsa-miR92-5p  | -4.968027551 | 0.026747951 | 0.00487162 |
| hsa-miR-4749-3p     | -1.556867154 | 0.662708311 | 0.307442   |
| hsa-miR-4502        | -3.160672629 | 0.569549551 | 0.209422   |
| novel-hsa-miR278-5p | -2.160672629 | 0.719907428 | 0.444314   |
| hsa-miR-302d-3p     | -1.293832748 | 0.584628558 | 0.22019    |
| hsa-miR-210-3p      | 1.008986523  | 0.021855898 | 0.0038905  |
| novel-hsa-miR73-5p  | 2.188767975  | 0.726813458 | 0.558972   |
| hsa-miR-191-5p      | -0.109047751 | 0           | 0          |
| novel-hsa-miR204-5p | -0.164549732 | 0.776122379 | 0.629966   |
| hsa-miR-1976        | 1.028095346  | 0.837723002 | 0.71336    |
| hsa-miR-6762-5p     | 2.188767975  | 0.726164518 | 0.558972   |
| hsa-miR-3177-3p     | 1.537108994  | 0.000131354 | 1.67E-05   |
| hsa-miR-4687-5p     | 1.613057847  | 0.62202787  | 0.242826   |
