# Supplementary material
Source: publisher figshare collection journal article supplement (https://diabetesjournals.figshare.com/articles/dataset/_/23552883)
Supplement: Supplementary file 7 [file 1]

**Supplementary Table S1 Clinical characteristics of 25 PDR patients and 40 sex-age matched MH patients for exosomal sequencing**

| <b>Characteristic</b> | <b>Number</b>      |                      | <b>P value</b> |
|-----------------------|--------------------|----------------------|----------------|
|                       | <b>PDR</b>         | <b>MH</b>            |                |
| <b>Age (years)</b>    | <b>60.44 ± 7.6</b> | <b>62.28 ± 8.243</b> | <b>0.372</b>   |
| <b>Gender</b>         |                    |                      |                |
| <b>Male</b>           | <b>11</b>          | <b>14</b>            | <b>0.4681</b>  |
| <b>Female</b>         | <b>14</b>          | <b>26</b>            |                |

**Sex was not considered a factor in the statistical analysis of the data.**
